# Supplementary material for: Mapping the phenotypic repertoire of the cytoplasmic 2-Cys peroxiredoxin – Thioredoxin system. 1. Understanding commonalities and differences among cell types
Source: PubMed Central journal article supplement — Redox Biol. 2017 Dec 21;15:297–315. doi: 10.1016/j.redox.2017.12.008 (PMC5975082; doi:10.1016/j.redox.2017.12.008), 2017-12-21
Supplement: mmc1.pdf [file mmc1.pdf]

1 Supplementary Information for:  
2 Selvaggio, G., Coelho, P.M.B.M., Salvador, A. (2017) “Mapping the  
3 phenotypic repertoire of the cytoplasmic 2-Cys peroxiredoxin –  
4 thioredoxin system. 1. Understanding commonalities and  
5 differences among cell types”

---

## 6 Table of Contents

|    |                                                                                         |    |
|----|-----------------------------------------------------------------------------------------|----|
| 7  | 1. The systems design space methodology for characterizing the phenotypic repertoire of |    |
| 8  | biochemical circuits                                                                    | 2  |
| 9  | 1.1. Basic framework                                                                    | 2  |
| 10 | 1.2. Finding all the quasi-equilibrium subsystems                                       | 10 |
| 11 | 1.3. Handling multiple alternative subdominant terms                                    | 13 |
| 12 | 1.4. Handling subdeterminate subdominant subsystems                                     | 14 |
| 13 | 2. Design space analysis of the PTTRS model                                             | 16 |
| 14 | 2.1. Characterization of phenotypic regions and determination of region borders         | 16 |
| 15 | 2.2. Inventory of the qualitatively distinct arrangements of phenotypic regions and     |    |
| 16 | responses                                                                               | 19 |
| 17 | 3. Parameter Estimations                                                                | 23 |
| 18 | 3.1. Estimation of protein concentrations in human cells from proteomic datasets        | 23 |
| 19 | 3.2. Estimations for Jurkat T Cells                                                     | 25 |
| 20 | 3.2.1. H <sub>2</sub> O <sub>2</sub> Permeability                                       | 25 |
| 21 | 3.2.2. Alternative H <sub>2</sub> O <sub>2</sub> sinks                                  | 28 |
| 22 | 3.2.3. Peroxiredoxin concentrations and rate constants                                  | 32 |
| 23 | 3.2.4. Peroxiredoxin glutathionylation                                                  | 35 |
| 24 | 3.2.5. Sulfiredoxin concentration and activity                                          | 37 |
| 25 | 3.2.6. Thioredoxin concentration                                                        | 38 |
| 26 | 3.2.7. Thioredoxin oxidation                                                            | 39 |
| 27 | 3.2.8. Thioredoxin reductase concentration and activity                                 | 40 |
| 28 | 3.2.9. NADP <sup>+</sup> reduction capacity                                             | 41 |
| 29 | 3.3. Estimations for other human cells                                                  | 42 |
| 30 | 3.4. Estimations for <i>Saccharomyces cerevisiae</i>                                    | 44 |
| 31 | 3.4.1. H <sub>2</sub> O <sub>2</sub> Permeability                                       | 44 |
| 32 | 3.4.2. Alternative H <sub>2</sub> O <sub>2</sub> sinks                                  | 44 |
| 33 | 3.4.3. Peroxiredoxin concentrations and rate constants                                  | 46 |
| 34 | 3.4.4. Sulfiredoxin concentration and activity                                          | 49 |
| 35 | 3.4.5. Thioredoxin concentration                                                        | 49 |
| 36 | 3.4.6. Thioredoxin reductase concentration and activity                                 | 50 |
| 37 | 3.5. Summary of protein concentrations and kinetic parameters                           | 51 |
| 38 | 4. Numerical model considering PrxI and PrxII separately                                | 52 |
| 39 | 5. Simulation of experimental results                                                   | 53 |
| 40 | 6. Additional design space slices and responses                                         | 60 |
| 41 | 7. References                                                                           | 65 |
| 42 |                                                                                         |    |

# 1. The systems design space methodology for characterizing the phenotypic repertoire of biochemical circuits

## 1.1. Basic framework

The analysis of the dynamic properties of the PTTRS is based on the systems design space methodology [1–6], with the modifications described below relative to the published technique. These modifications aim to improve the handling of cycles and moiety conservation relationships.

The model in Figure 1 translates into the following system of ordinary differential equations:

$$\begin{aligned}
 \frac{d H_2O_2}{dt} &= v_{\text{sup}} - k_{\text{Alt}} H_2O_2 - k_{\text{Ox}} Prx-S^- H_2O_2 - k_{\text{Sulf}} Prx-SO^- H_2O_2 \\
 \frac{d Prx-S^-}{dt} &= k_{\text{Red}} Trx-S^- Prx-SS - k_{\text{Ox}} Prx-S^- H_2O_2 \\
 \frac{d Prx-SO^-}{dt} &= k_{\text{Ox}} Prx-S^- H_2O_2 + k_{\text{Srx}} Prx-SO_2^- - k_{\text{Sulf}} Prx-SO^- H_2O_2 - k_{\text{Cond}} Prx-SO^- \\
 \frac{d Prx-SO_2^-}{dt} &= k_{\text{Sulf}} Prx-SO^- H_2O_2 - k_{\text{Srx}} Prx-SO_2^- \\
 \frac{d Prx-SS}{dt} &= k_{\text{Cond}} Prx-SO^- - k_{\text{Red}} Trx-S^- Prx-SS \\
 \frac{d Trx-S^-}{dt} &= \frac{V_{\text{Max}}^{\text{App}} Trx-SS}{K_M + Trx-SS} - k_{\text{Red}} Trx-S^- Prx-SS \\
 \frac{d Trx-SS}{dt} &= k_{\text{Red}} Trx-S^- Prx-SS - \frac{V_{\text{Max}}^{\text{App}} Trx-SS}{K_M + Trx-SS}
 \end{aligned} \tag{1}$$

In order to apply the system design space methodology we must recast this system to a canonical form, called a Generalized Mass Action (GMA) system [7], such that each term in the right hand side of the equations becomes a product of power laws. In the present case, this can be straightforwardly accomplished by defining a new ancillary variable  $X = K_M + Trx-SS$ . Further, we note that

$$\begin{aligned}
 \frac{d Prx-S^-}{dt} + \frac{d Prx-SO^-}{dt} + \frac{d Prx-SO_2^-}{dt} + \frac{d Prx-SS}{dt} &= \\
 = \frac{d(Prx-S^- + Prx-SO^- + Prx-SO_2^- + Prx-SS)}{dt} &= 0
 \end{aligned}$$

This shows that  $Prx-S^- + Prx-SO^- + Prx-SO_2^- + Prx-SS = Prx_T$  is a conserved quantity, corresponding to the total concentration of peroxiredoxin. Likewise,

60  $\frac{d Trx-S^-}{dt} + \frac{d Trx-SS}{dt} = \frac{d(Trx-S^- + Trx-SS)}{dt} = 0$ , showing that  $Trx-S^- + Trx-SS = Trx_T$  is also a  
61 conserved quantity, corresponding to the total concentration of thioredoxin. We can simplify  
62 the ordinary differential equations (ODE) system (1) by replacing two of the differential  
63 equations by these conservation relationships. Upon recasting and simplification, the equations  
64 are transformed to the equivalent form:

$$\begin{aligned}
\frac{d H_2O_2}{dt} &= v_{sup} - k_{Alt} H_2O_2 - k_{Ox} Prx-S^- H_2O_2 - k_{Sulf} Prx-SO^- H_2O_2 \\
\frac{d Prx-SO^-}{dt} &= k_{Ox} Prx-S^- H_2O_2 + k_{Srx} Prx-SO_2^- - k_{Sulf} Prx-SO^- H_2O_2 - k_{Cond} Prx-SO^- \\
\frac{d Prx-SO_2^-}{dt} &= k_{Sulf} Prx-SO^- H_2O_2 - k_{Srx} Prx-SO_2^- \\
\frac{d Prx-SS}{dt} &= k_{Cond} Prx-SO^- - k_{Red} Trx-S^- Prx-SS \\
\frac{d Trx-SS}{dt} &= k_{Red} Trx-S^- Prx-SS - V_{Max}^{App} Trx-SS X^{-1} \\
0 &= K_M + Trx-SS - X \\
0 &= Prx-S^- + Prx-SO^- + Prx-SO_2^- + Prx-SS - Prx_T \\
0 &= Trx-S^- + Trx-SS - Trx_T
\end{aligned} \tag{2}$$

66 Although not necessary for application of the system design space methodology, one can reduce  
67 the dimensionality of the parameters space by scaling all parameters and variables. We used  
68 the following scaling, which makes all variables and parameters dimensionless:

$$\begin{aligned}
\tau &= k_{Cond} t, \\
h &= \frac{H_2O_2}{Prx_T}, \quad x = \frac{Prx-S^-}{Prx_T}, \quad y = \frac{Prx-SO^-}{Prx_T}, \quad w = \frac{Prx-SO_2^-}{Prx_T}, \quad z = \frac{Prx-SS}{Prx_T}, \\
r &= \frac{Trx-S^-}{Trx_T}, \quad s = \frac{Trx-SS}{Trx_T}, \quad u = \frac{X}{Trx_T} \\
\alpha &= \frac{k_{Ox} Prx_T}{k_{Cond}}, \quad \beta = \frac{k_{Alt}}{k_{Cond}}, \quad \chi = \frac{K_M}{Trx_T}, \quad \phi = \frac{v_{Sup}}{k_{Cond} Prx_T}, \quad \eta = \frac{k_{Srx}}{k_{Cond}}, \\
\mu &= \frac{Trx_T}{Prx_T}, \quad \rho = \frac{k_{Red} Trx_T}{k_{Cond}}, \quad \sigma = \frac{V_{Max}^{App}}{k_{Cond} Prx_T}, \quad \psi = \frac{k_{Sulf} Prx_T}{k_{Cond}}.
\end{aligned} \tag{3}$$

70 Scaled variables  $x$ ,  $y$ ,  $w$  and  $z$  represent the fractions of the peroxiredoxin pool in each  
71 form, and scaled variables  $r$ ,  $s$  represent the fractions of the thioredoxin pool in each form.  
72 Upon this scaling, equations (2) become:

$$\frac{d h}{d \tau} = \phi - (\alpha x h + \beta h + \psi y h)$$

$$\frac{d y}{d \tau} = (\alpha x h + \eta w) - (y + \psi y h)$$

$$\frac{d w}{d \tau} = \psi y h - \eta w$$

$$73 \quad \frac{d z}{d \tau} = y - \rho r z \quad (4)$$

$$\mu \frac{d s}{d \tau} = \rho r z - \sigma s u^{-1}$$

$$0 = (\chi + s) - u$$

$$0 = (x + y + w + z) - 1$$

$$0 = (r + s) - 1$$

74 The parameters space is thereby reduced from 11 ( $v_{\text{sup}}, k_{\text{Alt}}, k_{\text{Ox}}, k_{\text{Cond}}, k_{\text{Sulf}}, k_{\text{Red}}, k_{\text{Srx}}, K_M,$   
 75  $V_{\text{Max}}^{\text{App}}, Pr_{x_T}, Tr_{x_T}$ ) to 9 dimensions, of which one (corresponding to  $\mu$ ) is immaterial for steady  
 76 state analysis.

77 The parentheses in equations (4) highlight that the right-hand parts of these equations are  
 78 differences between two positive-coefficient linear combinations of non-negative terms. Under  
 79 most conditions the value of each of these linear combinations is dominated by one of its terms.  
 80 Henceforth we will denote by *dominant positive term* and *dominant negative term* the dominant  
 81 terms in the positive and negative linear combinations (respectively) in an equation. For  
 82 instance, if  $\alpha = 20, x = 0.9, h = 0.05, \eta = 0.001, w = 0.01, y = 0.05, \psi = 0.1$ , then  $\alpha x h$  is the  
 83 dominant positive term and  $y$  is the dominant negative term for the second equation in (4).

84 We will denote by *dominant subsystem* any subsystem of (4) that retains only the dominant  
 85 terms of the whole system. For instance, in the case where the second consumption term for  $h$   
 86 and all the first terms in all other linear combinations are the dominant ones we obtain the  
 87 dominant subsystem:

$$\frac{dh}{d\tau} = \phi - \beta h$$

$$\frac{dy}{d\tau} = \alpha x h - y$$

$$\frac{dw}{d\tau} = \psi y h - \eta w$$

$$88 \quad \frac{dz}{d\tau} = y - \rho r z \quad (5)$$

$$\mu \frac{ds}{d\tau} = \rho r z - \sigma s u^{-1}$$

$$0 = \chi - u$$

$$0 = x - 1$$

$$0 = r - 1$$

89 Each system can generate  $S = \prod_{i=1}^e P_i N_i$  dominant subsystems, where  $e$  stands for the number

90 of equations, and  $P_i, N_i$  stand for the number of positive and negative terms (respectively) in

91 equation  $i$ . For instance, the present system can generate  $S = (1 \times 3)(2 \times 2)(1 \times 1)(1 \times 1)(1 \times 1)(2 \times 1)$

92  $(4 \times 1)(2 \times 1) = 192$  dominant subsystems.

93 Importantly, all dominant subsystems share a canonical nonlinear form such that the right-hand

94 side of the differential equations is a difference between products of power laws. Systems

95 exhibiting this canonical form are known as S systems [8–10] and have many desirable

96 mathematical properties [7]. Most relevant of these, closed form analytical steady state

97 solutions can be straightforwardly obtained upon a logarithmic transformation of all variables

98 and parameters. For dominant subsystem (5), defining  $a^* = \text{Log}(a)$ , we obtain:

$$\phi^* = \beta^* + h^*$$

$$\alpha^* + x^* + h^* = y^*$$

$$\psi^* + y^* + h^* = \eta^* + w^*$$

$$99 \quad y^* = \rho^* + r^* + z^* \quad (6)$$

$$\rho^* + r^* + z^* = \sigma^* + s^* - u^*$$

$$\chi^* = u^*$$

$$x^* = 0$$

$$r^* = 0$$

100 which yields the solution:

$$\begin{aligned}
h^* &= \phi^* - \beta^* \\
x^* &= 0 \\
y^* &= \alpha^* + \phi^* - \beta^* \\
101 \quad z^* &= \alpha^* + \phi^* - \beta^* - \rho^* & (7) \\
w^* &= 2\phi^* + \alpha^* + \psi^* - 2\beta^* - \eta^* \\
r^* &= 0 \\
s^* &= \alpha^* + \chi^* + \phi^* - \beta^* - \sigma^*
\end{aligned}$$

102 Each dominant subsystem approximates the behavior of the system in the region where the  
103 respective *dominance conditions* are valid. These conditions are the inequalities that define  
104 where each dominant term is higher than every other one in the respective positive or negative  
105 linear combination. For instance, the dominant subsystem (5) holds where the following set of  
106 dominance conditions is valid:

$$\begin{aligned}
&\beta h > \alpha x h \wedge \beta h > \psi y h \wedge \\
&\alpha x h > \eta w \wedge y > \psi y h \wedge \\
107 \quad &\chi > s \wedge & (8) \\
&x > y \wedge x > w \wedge x > z \wedge \\
&r > s
\end{aligned}$$

108 The dominance conditions define a *dominance region* in the phase space, which depends on  
109 parameters. A dominant subsystem may or may not be able to reach a steady state within its  
110 dominance region. In order to define the region of the parameters space where a dominant  
111 subsystem can attain a steady state within its dominance region, we replace its steady state  
112 solution into the dominance conditions. Again, we can transform these nonlinear inequalities  
113 to linear ones by applying the logarithmic transformation. The replaced inequalities thus  
114 become:

$$\begin{aligned}
&\beta^* - (\alpha^* + \phi^*) > 0 \\
&(\beta^* + \rho^*) - (\alpha^* + \phi^*) > 0 \\
&(\beta^* + \sigma^*) - (\alpha^* + \chi^* + \phi^*) > 0 \\
115 \quad &(2\beta^* + \eta^*) - (2\phi^* + \alpha^* + \psi^*) > 0 & (9) \\
&\beta^* - \alpha^* > 0 \\
&\beta^* - (\psi^* + \phi^*) > 0 \\
&(\beta^* + \sigma^*) - (\alpha^* + \phi^*) > 0
\end{aligned}$$

116 We will call these the *boundary conditions* for the dominant subsystem, and we will call the  
 117 dominant subsystem *valid* if its boundary conditions are feasible.

118 The boundary conditions for all the valid dominant subsystems pave the parameters space into  
 119 up to  $S$  discrete regions whose topology and geometry is determined by the system's  
 120 interaction structure (*design*). We call this partitioned space the *system design space*.

121

122 Some dominant subsystems can be sub-determinate. This happens in systems where a fast  
 123 (quasi-equilibrium) subsystem establishes under some conditions. These cases require special  
 124 consideration, and can be handled in a more expedite way through the matrix formulation  
 125 presented below.

126 System (4) can be represented in matrix form as:

127 
$$\dot{\mathbf{X}} = \mathbf{T}\mathbf{f}, \quad (10)$$

128 where  $\dot{\mathbf{X}}$  is the vector of time derivatives (possibly 0 for constant quantities),  $\mathbf{T}$  is the  $E \times T$ ,  
 129 with  $T$  the number of different terms, is *term coefficients matrix*, and  $\mathbf{f}$  is the *terms vector*.

130 Here,

131 
$$\mathbf{T} = \begin{bmatrix} 1 & -1 & -1 & -1 & 0 & 0 & 0 & 0 & 0 & 0 & 0 & 0 & 0 & 0 & 0 \\ 0 & 1 & 0 & -1 & 1 & -1 & 0 & 0 & 0 & 0 & 0 & 0 & 0 & 0 & 0 \\ 0 & 0 & 0 & 1 & -1 & 0 & 0 & 0 & 0 & 0 & 0 & 0 & 0 & 0 & 0 \\ 0 & 0 & 0 & 0 & 0 & 1 & -1 & 0 & 0 & 0 & 0 & 0 & 0 & 0 & 0 \\ 0 & 0 & 0 & 0 & 0 & 0 & 1 & -1 & 0 & 0 & 0 & 0 & 0 & 0 & 0 \\ 0 & 0 & 0 & 0 & 0 & 0 & 0 & 0 & 1 & 1 & -1 & 0 & 0 & 0 & 0 \\ 0 & 0 & 0 & 0 & 0 & 1 & 0 & 0 & 0 & 0 & 0 & 1 & 1 & 1 & 0 & -1 \\ 0 & 0 & 0 & 0 & 0 & 0 & 0 & 0 & 1 & 0 & 0 & 0 & 0 & 1 & -1 \end{bmatrix}, \quad (11)$$

$$\mathbf{f} = \begin{bmatrix} \phi \\ \alpha x h \\ \beta h \\ \psi y h \\ \eta w \\ y \\ \rho r z \\ \sigma s u^{-1} \\ \chi \\ s \\ u \\ x \\ w \\ z \\ r \\ 1 \end{bmatrix} \quad (12)$$

132

133 The upper left 5×8 submatrix of  $\mathbf{T}$  is the reduced stoichiometric matrix of the system, and the  
 134 remaining rows account for the ancillary variable and for the conservation relationships. Term  
 135 coefficients matrices for dominant subsystems are obtained by selecting from each row in  $\mathbf{T}$   
 136 one positive and one negative element and setting all other elements to 0. We identify each  
 137 dominant subsystem by a signature in the form  $(p_1, n_1, p_2, n_2, \dots, p_e, n_e)$  where  $p_i$  and  $n_i$  are  
 138 the indexes of the selected positive and negative elements in the  $i^{\text{th}}$  row of  $\mathbf{T}$ . Thus,

$$\mathbf{T}_{(1,3,2,6,4,5,6,7,7,8,9,11,12,16,15,16)} = \begin{bmatrix} 1 & 0 & -1 & 0 & 0 & 0 & 0 & 0 & 0 & 0 & 0 & 0 & 0 & 0 & 0 \\ 0 & 1 & 0 & 0 & 0 & -1 & 0 & 0 & 0 & 0 & 0 & 0 & 0 & 0 & 0 \\ 0 & 0 & 0 & 1 & -1 & 0 & 0 & 0 & 0 & 0 & 0 & 0 & 0 & 0 & 0 \\ 0 & 0 & 0 & 0 & 0 & 1 & -1 & 0 & 0 & 0 & 0 & 0 & 0 & 0 & 0 \\ 0 & 0 & 0 & 0 & 0 & 0 & 1 & -1 & 0 & 0 & 0 & 0 & 0 & 0 & 0 \\ 0 & 0 & 0 & 0 & 0 & 0 & 0 & 0 & 1 & 0 & -1 & 0 & 0 & 0 & 0 \\ 0 & 0 & 0 & 0 & 0 & 0 & 0 & 0 & 0 & 0 & 0 & 1 & 0 & 0 & 0 \\ 0 & 0 & 0 & 0 & 0 & 0 & 0 & 0 & 0 & 0 & 0 & 0 & 0 & 0 & -1 \\ 0 & 0 & 0 & 0 & 0 & 0 & 0 & 0 & 0 & 0 & 0 & 0 & 0 & 0 & 1 \\ 0 & 0 & 0 & 0 & 0 & 0 & 0 & 0 & 0 & 0 & 0 & 0 & 0 & 0 & -1 \end{bmatrix} \quad (13)$$

139

140 is the term coefficients matrix for the dominant subsystem (5). The rows of this matrix are  
 141 linearly independent, and therefore this dominant subsystem has a unique steady state solution  
 142 as seen above. However, this is not the case for, say, the dominant subsystem  
 143  $(1,3,5,4,4,5,6,7,8,7,9,11, 12,16,15,16)$ :



144 
$$\mathbf{T}_{(1,3,5,4,4,5,6,7,8,7,9,11,12,16,15,16)} =$$

$$= \begin{bmatrix} 1 & 0 & -1 & 0 & 0 & 0 & 0 & 0 & 0 & 0 & 0 & 0 & 0 & 0 & 0 \\ 0 & 0 & 0 & -1 & 1 & 0 & 0 & 0 & 0 & 0 & 0 & 0 & 0 & 0 & 0 \\ 0 & 0 & 0 & 1 & -1 & 0 & 0 & 0 & 0 & 0 & 0 & 0 & 0 & 0 & 0 \\ 0 & 0 & 0 & 0 & 0 & 1 & -1 & 0 & 0 & 0 & 0 & 0 & 0 & 0 & 0 \\ 0 & 0 & 0 & 0 & 0 & 0 & -1 & 1 & 0 & 0 & 0 & 0 & 0 & 0 & 0 \\ 0 & 0 & 0 & 0 & 0 & 0 & 0 & 0 & 1 & 0 & -1 & 0 & 0 & 0 & 0 \\ 0 & 0 & 0 & 0 & 0 & 0 & 0 & 0 & 0 & 0 & 0 & 1 & 0 & 0 & -1 \\ 0 & 0 & 0 & 0 & 0 & 0 & 0 & 0 & 0 & 0 & 0 & 0 & 0 & 1 & -1 \end{bmatrix}, \quad (14)$$

145 Here, the second and third rows, corresponding to the differential equations for  $y$  and  $w$ , are  
 146 linearly dependent. This sub-determinate dominant subsystem thus does not permit the  
 147 simultaneous determination of both  $y$  and  $w$ , but yields instead an algebraic relationship  
 148 among these variables:

149 
$$\frac{w}{y} = \frac{\psi}{\eta} h . \quad (15)$$

150 This translates the fact that under the conditions where this dominant subsystem holds a quasi-  
 151 equilibrium establishes between Prx-SO<sup>-</sup> and Prx-SO<sub>2</sub><sup>-</sup> owing to rapid recycling between the  
 152 sulfonylation and the sulfiredoxin-catalyzed reduction of the sulfinic acid (physiologically  
 153 implausible but possible). Prx-SO<sup>-</sup> and Prx-SO<sub>2</sub><sup>-</sup> thus form an aggregated pool whose total  
 154 concentration moves in a slower time scale and is determined by subdominant processes in the  
 155 system. The subdominant terms that can potentially determine the concentration of the  
 156 aggregated pool are those that do not cancel out upon addition of the differential equations for  
 157  $y$  and  $w$ , which expresses  $\frac{d(w+y)}{dt}$ . That is, those terms corresponding to non-null elements  
 158 in the sum of the second and third rows of  $\mathbf{T}$ . By replacing one of the linearly dependent rows  
 159 in  $T_{(1,3,5,4,4,5,6,7,8,7,9,11,6,16,10,16)}$  by this sum, one obtains a full-rank matrix:

160 
$$\mathbf{T}_{(1,3,(5,2),(4,6),4,5,6,7,8,7,9,11,12,16,15,16)} =$$

$$= \begin{bmatrix} 1 & 0 & -1 & 0 & 0 & 0 & 0 & 0 & 0 & 0 & 0 & 0 & 0 & 0 & 0 \\ 0 & 1 & 0 & 0 & 0 & -1 & 0 & 0 & 0 & 0 & 0 & 0 & 0 & 0 & 0 \\ 0 & 0 & 0 & 1 & -1 & 0 & 0 & 0 & 0 & 0 & 0 & 0 & 0 & 0 & 0 \\ 0 & 0 & 0 & 0 & 0 & 1 & -1 & 0 & 0 & 0 & 0 & 0 & 0 & 0 & 0 \\ 0 & 0 & 0 & 0 & 0 & 0 & -1 & 1 & 0 & 0 & 0 & 0 & 0 & 0 & 0 \\ 0 & 0 & 0 & 0 & 0 & 0 & 0 & 0 & 1 & 0 & -1 & 0 & 0 & 0 & 0 \\ 0 & 0 & 0 & 0 & 0 & 0 & 0 & 0 & 0 & 0 & 0 & 1 & 0 & 0 & -1 \\ 0 & 0 & 0 & 0 & 0 & 0 & 0 & 0 & 0 & 0 & 0 & 0 & 0 & 1 & -1 \end{bmatrix} \quad (16)$$



184 determinate dominant subsystem with term coefficients matrix  $\mathbf{T}_{(\dots)}$ . In order to do this and  
 185 generate the term coefficients matrices for the subdominant subsystems we proceed as follows:

186 1. We first compute the left null space of  $\mathbf{T}_{(\dots)}$ , i.e., the  $D \times E$  matrix  $\mathbf{U}$  such that  
 187  $\mathbf{U} \cdot \mathbf{T}_{(\dots)} = \mathbf{0}$  We then apply to  $\mathbf{T}_{(\dots)}$  the algorithm for finding all extreme semi-positive  
 188 conservation relations developed by Schuster and Höfer [11]. This algorithm returns a  
 189  $F \times E, (F \leq D + 1)$  matrix  $\mathbf{V}$  of non-negative elements whose rows are the generating  
 190 vectors of the convex polyhedral cone describing all the semi-  
 191 positive conservation relations admissible by  $\mathbf{T}_{(\dots)}$ . If  $F \geq D$  or  
 192 all the rows of  $\mathbf{U}$  are linearly dependent from those of  $\mathbf{V}$  we  
 193 select the first  $D$  rows from  $\mathbf{V}$ , and call the resulting matrix  $\mathbf{B}$   
 194 . If  $U$  rows from  $\mathbf{U}$  cannot be expressed as a linear  
 195 combination of those of  $\mathbf{V}$  one picks those  $U$  rows from  $\mathbf{U}$   
 196 and  $D - U$  rows from  $\mathbf{V}$  to form  $\mathbf{B}$ . The  $D \times T$  matrix  
 197  $\mathbf{Q} = \mathbf{B} \cdot \mathbf{T}$  carries the coefficients of the potentially  
 198 subdominant terms establishing the dynamics of each quasi-  
 199 equilibrium pool.

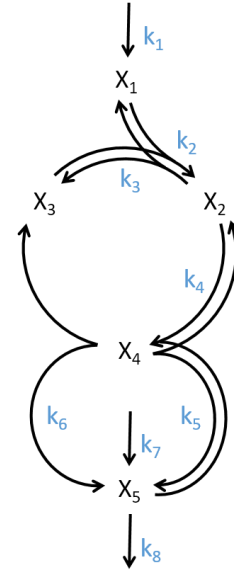

Supplementary Figure 1

200 2. From each row of  $\mathbf{B}$  we select the index of a positive  
 201 coordinate such that all selected indices are distinct: set  $C = \{c_1, c_2, \dots, c_D\}$ .  
 202  
 203 3. Then, for each  $c_i \in C$  we replace row  $c_i$  of  $\mathbf{T}_{(\dots)}$  by row  $i$  of  $\mathbf{Q}$ .

204 This procedure can be illustrated by the example circuit in Supplementary Figure 1. The  
 205 dynamics can be expressed by the system of equations:

$$\begin{aligned}
 \frac{d X_1}{d t} &= k_1 + k_3 X_2 - k_2 X_1 X_3 \\
 \frac{d X_2}{d t} &= k_2 X_1 X_3 + k_5 X_4 - k_3 X_2 - k_4 X_2 X_5 \\
 \frac{d X_4}{d t} &= k_4 X_2 X_5 - k_5 X_4 - k_6 X_4 \\
 \frac{d X_5}{d t} &= k_5 X_4 + k_6 X_4 + k_7 - k_4 X_2 X_5 - k_8 X_5 \\
 0 &= X_2 + X_3 + X_4 - X_6
 \end{aligned} \tag{19}$$

207 The steady state equations for this system can be expressed as  $\mathbf{T} \mathbf{f} = \mathbf{0}$  term coefficients matrix:

$$208 \quad \mathbf{T} = \begin{bmatrix} 1 & 1 & -1 & 0 & 0 & 0 & 0 & 0 & 0 & 0 & 0 & 0 \\ 0 & -1 & 1 & 1 & -1 & 0 & 0 & 0 & 0 & 0 & 0 & 0 \\ 0 & 0 & 0 & -1 & 1 & -1 & 0 & 0 & 0 & 0 & 0 & 0 \\ 0 & 0 & 0 & 1 & -1 & 1 & 1 & -1 & 0 & 0 & 0 & 0 \\ 0 & 0 & 0 & 0 & 0 & 0 & 0 & 0 & 1 & 1 & 1 & -1 \end{bmatrix}. \quad (20)$$

209 and terms vector

$$210 \quad \mathbf{f} = \begin{bmatrix} k_1 \\ k_3 X_2 \\ k_2 X_1 X_3 \\ k_5 X_4 \\ k_4 X_2 X_5 \\ k_6 X_4 \\ k_7 \\ k_8 X_5 \\ X_2 \\ X_3 \\ X_4 \\ X_6 \end{bmatrix} \quad (21)$$

211 Focusing on dominant subsystem (2,3,3,2,5,4,4,5,10,12), whose dominance region is defined by

$$212 \quad R_{(2,3,3,2,5,4,4,5,10,12)} = f_2 > f_1 \wedge f_3 > f_4 \wedge f_4 > f_6 \wedge f_4 > f_7 \wedge f_{10} > f_9 \wedge f_{10} > f_{11} \wedge f_2 > f_5 \wedge f_5 > f_8$$

213 we find:

$$214 \quad \mathbf{T}_{(2,3,3,2,5,4,4,5,10,12)} = \begin{bmatrix} 0 & 1 & -1 & 0 & 0 & 0 & 0 & 0 & 0 & 0 & 0 & 0 \\ 0 & -1 & 1 & 0 & 0 & 0 & 0 & 0 & 0 & 0 & 0 & 0 \\ 0 & 0 & 0 & -1 & 1 & 0 & 0 & 0 & 0 & 0 & 0 & 0 \\ 0 & 0 & 0 & 1 & -1 & 0 & 0 & 0 & 0 & 0 & 0 & 0 \\ 0 & 0 & 0 & 0 & 0 & 0 & 0 & 0 & 0 & 1 & 0 & -1 \end{bmatrix}. \quad (22)$$

215 This matrix has rank deficiency  $D=2$ , and accordingly we find

$$216 \quad \mathbf{B} = \begin{bmatrix} 0 & 0 & 1 & 1 & 0 \\ 1 & 1 & 0 & 0 & 0 \end{bmatrix}, \quad (23)$$

217 identifying  $X_1 + X_2$  and  $X_4 + X_5$  as slow aggregated variables. Matrix  $\mathbf{Q}$  is then

$$218 \quad \mathbf{Q} = \begin{bmatrix} 0 & 0 & 0 & 0 & 0 & 0 & 1 & -1 & 0 & 0 & 0 & 0 \\ 1 & 0 & 0 & 1 & -1 & 0 & 0 & 0 & 0 & 0 & 0 & 0 \end{bmatrix}. \quad (24)$$

219 The third element in the first row and the first element in the second row of  $\mathbf{Q}$  are non-zero.  
 220 Thus, we can replace the third rows of both  $\mathbf{T}$  and  $\mathbf{T}'_{(2,3,3,2,5,4,4,5,10,12)}$  by the first row of  $\mathbf{Q}$  and  
 221 the first row in the former matrices by the second row of the latter to obtain:

$$222 \quad \mathbf{T}' = \begin{bmatrix} 1 & 0 & 0 & 1 & -1 & 0 & 0 & 0 & 0 & 0 & 0 & 0 \\ 0 & -1 & 1 & 1 & -1 & 0 & 0 & 0 & 0 & 0 & 0 & 0 \\ 0 & 0 & 0 & 0 & 0 & 0 & 1 & -1 & 0 & 0 & 0 & 0 \\ 0 & 0 & 0 & 1 & -1 & 1 & 1 & -1 & 0 & 0 & 0 & 0 \\ 0 & 0 & 0 & 0 & 0 & 0 & 0 & 0 & 1 & 1 & 1 & -1 \end{bmatrix}, \quad (25)$$

$$223 \quad \mathbf{T}'_{(2,3,3,2,5,4,4,5,10,12)} = \begin{bmatrix} 1 & 0 & 0 & 1 & -1 & 0 & 0 & 0 & 0 & 0 & 0 & 0 \\ 0 & -1 & 1 & 0 & 0 & 0 & 0 & 0 & 0 & 0 & 0 & 0 \\ 0 & 0 & 0 & 0 & 0 & 0 & 1 & -1 & 0 & 0 & 0 & 0 \\ 0 & 0 & 0 & 1 & -1 & 0 & 0 & 0 & 0 & 0 & 0 & 0 \\ 0 & 0 & 0 & 0 & 0 & 0 & 0 & 0 & 0 & 1 & 0 & -1 \end{bmatrix}. \quad (26)$$

### 224 1.3. Handling multiple alternative subdominant terms

225 The first row of  $\mathbf{T}'_{(2,3,3,2,5,4,4,5,10,12)}$  contains two positive elements reflecting the  
 226 contributions of both reactions 1 and 4 to the aggregated pool  $X_1 + X_2$ , and therefore there  
 227 are two subdominant subsystems:  $((2,1),(3,5),3,2,(5,7),(4,8),4,5,10,12)$  and  
 228  $((2,4),(3,5),3,2,(5,7),(4,8),4,5,10,12)$ .

229 In general, each sub-determinate dominant subsystem  $(p_1, n_1, \dots, p_k, n_k, \dots, p_E, n_E)$  can generate  
 230  $A \times B$  subdominant subsystems:  $(p_1, n_1, \dots, (p_k, p_{i_1}), (n_k, n_{j_1}), \dots, p_E, n_E), \dots,$   
 231  $(p_1, n_1, \dots, (p_k, p_{i_A}), (n_k, n_{j_B}), \dots, p_E, n_E)$ , where  $A$  and  $B$  are the numbers of potentially  
 232 subdominant production and consumption terms, respectively. Each of these subdominant  
 233 subsystems in turn corresponds to a different dominant subsystem —  
 234  $(p_1, n_1, \dots, p_{i_1}, n_{j_1}, \dots, p_E, n_E), \dots, (p_1, n_1, \dots, p_{i_A}, n_{j_B}, \dots, p_E, n_E)$ , respectively — which may be  
 235 valid or invalid. The dominance region of a subdominant subsystem  
 236  $(p_1, n_1, \dots, (p_k, p_{i_l}), (n_k, n_{j_m}), \dots, p_E, n_E)$  is the intersection between that for its originating  
 237 dominant subsystem  $(p_1, n_1, \dots, p_k, n_k, \dots, p_E, n_E)$  and the *sub-dominance region* defining where  
 238 the subdominant terms  $f_{p_{i_l}}$  and  $f_{n_{j_m}}$  are higher than every other potentially subdominant  
 239 term. More precisely,  $t_{k,p_{i_l}} f_{p_{i_l}} > t_{k,p_{i_c}} f_{p_{i_c}} \wedge -t_{k,n_{j_m}} f_{n_{j_m}} > -t_{k,n_{j_d}} f_{n_{j_d}}$ ,

240  $\forall_{c \in \{1,2,\dots,A\} \setminus \{c\}, d \in \{1,2,\dots,B\} \setminus \{m\}}$ . The boundary conditions for the subdominant subsystem  
 241  $(p_1, n_1, \dots, (p_k, p_{i_l}), (n_k, n_{j_m}), \dots, p_E, n_E)$  are obtained by replacing into the conditions defining its

242 dominance region the steady state solution for the dominant subsystem  
 243  $(p_1, n_1, \dots, p_i, n_{j_m}, \dots, p_E, n_E)$ .

244 Thus, the subdominance region for the subdominant subsystem  $((2,4),(3,5),3,2,(5,7),(4,8),4,5,$   
 245  $10,12)$  in the present example is defined by  $f_4 > f_1$ , and its dominance region is defined by  
 246  $R_{((2,4),(3,5),3,2,(5,7),(4,8),4,5,10,12)} = R_{(2,3,3,2,5,4,4,5,10,12)} \wedge f_4 > f_1$ .

#### 247 1.4. Handling subdeterminate subdominant subsystems

248 Simple inspection of  $\mathbf{T}'_{(2,3,3,2,5,4,4,5,10,12)}$  shows that  $\mathbf{T}_{((2,4),(3,5),3,2,(5,7),(4,8),4,5,10,12)}$  is  
 249 again subdeterminate, with  $D=1$ . In general, the subdetermination of  
 250  $\mathbf{T}_{(p_1, n_1, \dots, (p_k, p_{i_j}), (n_k, n_{j_m}), \dots, p_E, n_E)}$  can be dealt with by iterating the steps above — treating  $\mathbf{T}'$  as  
 251 if it was  $\mathbf{T}$  and  $\mathbf{T}_{(p_1, n_1, \dots, (p_k, p_{i_j}), (n_k, n_{j_m}), \dots, p_E, n_E)}$  as if it was  $\mathbf{T}_{(p_1, n_1, \dots, p_k, n_k, \dots, p_E, n_E)}$  — until no more  
 252 sub-determinate dominant subsystems are generated.

253 In the present example, applying the procedure in point 1 we find that in this case it is not  
 254 possible to express the slow aggregated variable as a positive linear combination of  
 255 concentrations. We have instead:

$$256 \quad \mathbf{B} = [1 \ 0 \ 0 \ -1 \ 0], \quad (27)$$

257 Identifying  $X_1 + X_2 - X_4$  as the new slow variable. [Note that the first row of  
 258  $\mathbf{T}_{((2,4),(3,5),3,2,(5,7),(4,8),4,5,10,12)}$  contains the term coefficients for  $\frac{d(X_1 + X_2)}{dt}$ .] Multiplying  $\mathbf{B}$   
 259 by  $\mathbf{T}'$  yields

$$260 \quad \mathbf{Q} = [1 \ 0 \ 0 \ 0 \ 0 \ -1 \ -1 \ 1 \ 0 \ 0 \ 0 \ 0], \quad (28)$$

261 which can replace the first row of  $\mathbf{T}_{((2,4),(3,5),3,2,(5,7),(4,8),4,5,10,12)}$  to give

$$262 \quad \mathbf{T}'_{((2,4),(3,5),3,2,(5,7),(4,8),4,5,10,12)} = \begin{bmatrix} 1 & 0 & 0 & 0 & -1 & -1 & 1 & 0 & 0 & 0 & 0 & 0 \\ 0 & -1 & 1 & 0 & 0 & 0 & 0 & 0 & 0 & 0 & 0 & 0 \\ 0 & 0 & 0 & 0 & 0 & 0 & 1 & -1 & 0 & 0 & 0 & 0 \\ 0 & 0 & 0 & 1 & -1 & 0 & 0 & 0 & 0 & 0 & 0 & 0 \\ 0 & 0 & 0 & 0 & 0 & 0 & 0 & 0 & 0 & 1 & 0 & -1 \end{bmatrix}. \quad (29)$$

263 There are now four sub-sub-dominant subsystems. Namely  
 264  $((2,4,1),(3,5,5),3,2,(5,7,7),(4,8,8),4,5,10,12)$ , with  
 265  $R_{((2,4,1),(3,5,5),3,2,(5,7,7),(4,8,8),4,5,10,12)} = R_{((2,4),(3,5),3,2,(5,7),(4,8),4,5,10,12)} \wedge f_1 > f_7 \wedge f_6 > f_5$ ,

266  $((2,4,1),(3,5,6),3,2,(5,7,7),(4,8,8),4,5,10,12),$  with

267  $R_{((2,4,1),(3,5,6),3,2,(5,7,7),(4,8,8),4,5,10,12)} = R_{((2,4),(3,5),3,2,(5,7),(4,8),4,5,10,12)} \wedge f_1 > f_7 \wedge f_5 > f_6 ,$

268  $((2,4,7),(3,5,5),3,2,(5,7,7),(4,8,8),4,5,10,12),$  with

269  $R_{((2,4,7),(3,5,5),3,2,(5,7,7),(4,8,8),4,5,10,12)} = R_{((2,4),(3,5),3,2,(5,7),(4,8),4,5,10,12)} \wedge f_7 > f_1 \wedge f_6 > f_5 ,$  and

270  $((2,4,7),(3,5,6),3,2,(5,7,7),(4,8,8),4,5,10,12),$  with

271  $R_{((2,4,7),(3,5,6),3,2,(5,7,7),(4,8,8),4,5,10,12)} = R_{((2,4),(3,5),3,2,(5,7),(4,8),4,5,10,12)} \wedge f_7 > f_1 \wedge f_5 > f_6 .$

272 All these subsystems are fully determinate, but only subsystem

273  $((2,4,1),(3,5,6),3,2,(5,7,7),(4,8,8),4,5,10,12)$  has a steady state solution within its boundaries.

274 Namely,

$$\begin{aligned}
 X_1^* &= k_1^* - k_2^* + k_3^* - k_4^* + k_5^* - k_6^* - k_7^* + k_8^* - X_6^* \\
 X_2^* &= k_1^* - k_4^* + k_5^* - k_6^* - k_7^* + k_8^* \\
 X_3^* &= X_6^* \\
 X_4^* &= k_1^* - k_6^* \\
 X_5^* &= k_7^* - k_8^*
 \end{aligned}
 \tag{30}$$

276 with boundaries

$$\begin{aligned}
 k_1^* - k_7^* &> 0 \wedge \\
 k_5^* - k_6^* &> 0 \wedge \\
 k_3^* - k_4^* - k_7^* + k_8^* &> 0 \wedge \\
 -k_1^* + k_6^* + X_6^* &> 0 \wedge \\
 -k_1^* + k_4^* - k_5^* + k_6^* + k_7^* - k_8^* + X_6^* &> 0.
 \end{aligned}
 \tag{31}$$

## 278 2. Design space analysis of the PTTRS model

### 279 2.1. Characterization of phenotypic regions and determination of region 280 borders

281 The approach described in Section 1 yields the 13 valid dominant subsystems whose  
282 steady state properties and boundary conditions are listed in Supplementary Table 1 and  
283 Supplementary Table 2, respectively. Not all of these are representative of the phenotypes of  
284 real cells, though. To select the biologically plausible regions, one must consider the ranges of  
285 kinetic parameters and protein concentrations found in real cells. We consider the following  
286 three plausibility criteria cumulatively, which are justified in the main text.

287 First, reduction of sulfenylated form of peroxiredoxin is the least active process the system:

$$288 \quad k_{\text{Srx}} < \min(k_{\text{Alt}}, k_{\text{Ox}} \text{Prx}_T, k_{\text{Sulf}} \text{Prx}_T, k_{\text{Cond}}, k_{\text{Red}} \text{Trx}_T, \frac{V_{\text{Max}}^{\text{App}}}{\text{Prx}_T}, \frac{V_{\text{Max}}^{\text{App}}}{\text{Prx}_T} \frac{\text{Trx}_T}{K_M})$$

289 Second, the pseudo-first order-rate constant for Prx-S<sup>•</sup> oxidation by H<sub>2</sub>O<sub>2</sub> strongly exceeds the  
290 rate constant for Prx-SO<sup>•</sup> condensation:

$$291 \quad k_{\text{Ox}} \text{Prx}_T > k_{\text{Cond}}$$

292 Third, Prx sulfenylation is the slowest among all H<sub>2</sub>O<sub>2</sub>-consuming processes in the model:

$$293 \quad k_{\text{Sulf}} \text{Prx}_T < \min(k_{\text{Alt}}, k_{\text{Ox}} \text{Prx}_T)$$

294 The steady state properties of the eight regions that satisfy these plausibility conditions are  
295 listed in Supplementary Table 1 in mathematical form in terms of unscaled variables and  
296 parameters. The boundary conditions defining each region within the parameters space are  
297 shown in Supplementary Table 2.



298 **Supplementary Table 1. Steady state concentrations for the biologically relevant phenotypic regions.** Color code is as for Figure 2.

| Region | $H_2O_2$                                          | $Prx-S^-$                                                            | $Prx-SO^-$                                       | $Prx-SS$                                                                | $Prx-SO_2^-$                                                                | $Trx-S^-$                                       | $Trx-SS$                                                                    |
|--------|---------------------------------------------------|----------------------------------------------------------------------|--------------------------------------------------|-------------------------------------------------------------------------|-----------------------------------------------------------------------------|-------------------------------------------------|-----------------------------------------------------------------------------|
| HTPU   | $\frac{k_{Cond} k_{Srx} Prx_T}{k_{Sulf} v_{sup}}$ | $\frac{k_{Sulf} v_{sup}^2}{k_{Cond} k_{Ox} k_{Srx} Prx_T}$           | $\frac{v_{sup}}{k_{Cond}}$                       | $\frac{v_{sup}}{k_{Red} Trx_T}$                                         | $Prx_T$                                                                     | $Trx_T$                                         | $\frac{K_M v_{sup}}{V_{Max}^{App}}$                                         |
| TTPU   | $\frac{v_{sup}}{k_{Ox} Prx_T}$                    | $Prx_T$                                                              | $\frac{v_{sup}}{k_{Cond}}$                       | $\frac{v_{sup}}{k_{Red} Trx_T}$                                         | $\frac{k_{Sulf} v_{sup}^2}{k_{Cond} k_{Ox} k_{Srx} Prx_T}$                  | $Trx_T$                                         | $\frac{K_M v_{sup}}{V_{Max}^{App}}$                                         |
| STAU   | $\frac{v_{sup}}{k_{Alt}}$                         | $\frac{k_{Alt} k_{Cond} Prx_T}{k_{Ox} v_{sup}}$                      | $Prx_T$                                          | $\frac{k_{Cond} Prx_T}{k_{Red} Trx_T}$                                  | $\frac{k_{Sulf} Prx_T v_{sup}}{k_{Alt} k_{Srx}}$                            | $Trx_T$                                         | $\frac{k_{Cond} K_M Prx_T}{V_{Max}^{App}}$                                  |
| HTAU   | $\frac{v_{sup}}{k_{Alt}}$                         | $\frac{k_{Alt}^2 k_{Cond} k_{Srx} Prx_T}{k_{Ox} k_{Sulf} v_{sup}^2}$ | $\frac{k_{Alt} k_{Srx} Prx_T}{k_{Sulf} v_{sup}}$ | $\frac{k_{Alt} k_{Cond} k_{Srx} Prx_T}{k_{Red} k_{Sulf} v_{sup} Trx_T}$ | $Prx_T$                                                                     | $Trx_T$                                         | $\frac{k_{Alt} k_{Cond} k_{Srx} Prx_T K_M}{k_{Sulf} V_{Max}^{App} v_{sup}}$ |
| TTAU   | $\frac{v_{sup}}{k_{Alt}}$                         | $Prx_T$                                                              | $\frac{k_{Ox} Prx_T v_{sup}}{k_{Alt} k_{Cond}}$  | $\frac{k_{Ox} Prx_T v_{sup}}{k_{Alt} k_{Red} Trx_T}$                    | $\frac{k_{Ox} k_{Sulf} Prx_T v_{sup}^2}{k_{Alt}^2 k_{Cond} k_{Srx}}$        | $Trx_T$                                         | $\frac{k_{Ox} K_M Prx_T v_{sup}}{k_{Alt} V_{Max}^{App}}$                    |
| DTAU   | $\frac{v_{sup}}{k_{Alt}}$                         | $\frac{k_{Alt} k_{Red} Prx_T Trx_T}{k_{Ox} v_{sup}}$                 | $\frac{k_{Red} Prx_T Trx_T}{k_{Cond}}$           | $Prx_T$                                                                 | $\frac{k_{Red} k_{Sulf} Prx_T v_{sup} Trx_T}{k_{Alt} k_{Cond} k_{Srx}}$     | $Trx_T$                                         | $\frac{k_{Red} K_M Prx_T Trx_T}{V_{Max}^{App}}$                             |
| DDAU   | $\frac{v_{sup}}{k_{Alt}}$                         | $\frac{k_{Alt} V_{Max}^{App} Trx_T}{k_{Ox} K_M v_{sup}}$             | $\frac{V_{Max}^{App} Trx_T}{k_{Cond} K_M}$       | $Prx_T$                                                                 | $\frac{k_{Sulf} Trx_T v_{sup} V_{Max}^{App}}{k_{Alt} k_{Cond} k_{Srx} K_M}$ | $\frac{V_{Max}^{App} Trx_T}{k_{Red} K_M Prx_T}$ | $Trx_T$                                                                     |
| DDAS   | $\frac{v_{sup}}{k_{Alt}}$                         | $\frac{k_{Alt} V_{Max}^{App}}{k_{Ox} v_{sup}}$                       | $\frac{V_{Max}^{App}}{k_{Cond}}$                 | $Prx_T$                                                                 | $\frac{k_{Sulf} V_{Max}^{App} v_{sup}}{k_{Alt} k_{Cond} k_{Srx}}$           | $\frac{V_{Max}^{App}}{k_{Red} Prx_T}$           | $Trx_T$                                                                     |

299

| Region      | Boundary conditions                                                                                                                                                                                                                                                                                                                                                                                                                                               |
|-------------|-------------------------------------------------------------------------------------------------------------------------------------------------------------------------------------------------------------------------------------------------------------------------------------------------------------------------------------------------------------------------------------------------------------------------------------------------------------------|
| <b>HTPU</b> | $\max \left( k_{Srx} Prx_T, \sqrt{\frac{k_{Alt} k_{Cond} k_{Srx} Prx_T}{k_{Sulf}}} \right) < v_{sup} <$ $< \min \left( k_{Cond} Prx_T, \sqrt{\frac{k_{Cond} k_{Ox} k_{Srx} Prx_T}{k_{Sulf}}}, k_{Red} Prx_T Trx_T, V_{Max}^{App}, \frac{V_{Max}^{App}}{K_M} Trx_T \right)$                                                                                                                                                                                        |
| <b>TTPU</b> | $v_{sup} < \min \left( k_{Cond} Prx_T, \sqrt{\frac{k_{Cond} k_{Ox} k_{Srx} Prx_T}{k_{Sulf}}}, \frac{k_{Cond} k_{Ox} Prx_T}{k_{Sulf}}, k_{Red} Prx_T Trx_T, V_{Max}^{App}, \frac{V_{Max}^{App}}{K_M} Trx_T \right) \wedge k_{Alt} < k_{Ox} Prx_T$                                                                                                                                                                                                                  |
| <b>STAU</b> | $V_{Max}^{App} > k_{Cond} Prx_T \max \left( 1, \frac{K_M}{Trx_T} \right) \wedge Trx_T > \frac{k_{Cond}}{k_{Red}} \wedge k_{Alt} > k_{Sulf} Prx_T \wedge$ $\wedge k_{Cond} \max \left( \frac{k_{Alt}}{k_{Ox}}, Prx_T \right) < v_{sup} < \frac{k_{Alt} k_{Srx}}{k_{Sulf}}$                                                                                                                                                                                         |
| <b>HTAU</b> | $v_{sup} > \frac{k_{Alt} k_{Srx}}{k_{Sulf}} \max \left( 1, \sqrt{\frac{k_{Cond} k_{Sulf}}{k_{Ox} k_{Srx}}}, \frac{k_{Cond}}{k_{Red} Trx_T}, \frac{k_{Cond} Prx_T}{V_{Max}^{App}}, \frac{k_{Cond} Prx_T K_M}{V_{Max}^{App} Trx_T} \right) \wedge$ $\wedge \left( \sqrt{\frac{k_{Alt} k_{Cond} k_{Srx} Prx_T}{k_{Sulf}}} < v_{sup} < \frac{k_{Alt} k_{Cond}}{k_{Sulf}} \vee v_{sup} > \max \left( \frac{k_{Alt} k_{Cond}}{k_{Sulf}}, k_{Srx} Prx_T \right) \right)$ |
| <b>TTAU</b> | $v_{sup} < \frac{k_{Alt}}{k_{Ox} Prx_T} \min \left( k_{Cond} Prx_T, \frac{k_{Cond} k_{Alt}}{k_{Sulf}}, \sqrt{\frac{k_{Cond} k_{Ox} k_{Srx} Prx_T}{k_{Sulf}}}, k_{Red} Prx_T Trx_T, V_{Max}^{App}, \frac{V_{Max}^{App}}{K_M} Trx_T \right) \wedge k_{Alt} > k_{Ox} Prx_T$                                                                                                                                                                                          |
| <b>DTAU</b> | $k_{Red} Trx_T \max \left( \frac{k_{Alt}}{k_{Ox}}, Prx_T \right) < v_{sup} < \frac{k_{Alt} k_{Cond} k_{Srx}}{k_{Red} k_{Sulf} Trx_T} \wedge$ $\wedge V_{Max}^{App} > k_{Red} K_M Prx_T \wedge Trx_T < \frac{k_{Cond}}{k_{Red}} \min \left( 1, \frac{k_{Alt}}{k_{Sulf} Prx_T}, \frac{V_{Max}^{App}}{k_{Cond} Prx_T} \right)$                                                                                                                                       |
| <b>DDAU</b> | $\frac{V_{Max}^{App}}{K_M} Trx_T \max \left( 1, \frac{k_{Alt}}{k_{Ox} Prx_T} \right) < v_{sup} < \frac{k_{Alt} k_{Cond} k_{Srx} K_M Prx_T}{k_{Sulf} V_{Max}^{App} Trx_T} \wedge$ $\wedge Trx_T < K_M \min \left( 1, \frac{k_{Alt} k_{Cond}}{k_{Sulf} V_{Max}^{App}}, \frac{k_{Cond} Prx_T}{V_{Max}^{App}}, \frac{k_{Red} Prx_T Trx_T}{V_{Max}^{App}} \right)$                                                                                                     |
| <b>DDAS</b> | $V_{Max}^{App} \max \left( 1, \frac{k_{Alt}}{k_{Ox} Prx_T} \right) < v_{sup} < \frac{k_{Alt} k_{Cond} k_{Srx} Prx_T}{k_{Sulf} V_{Max}^{App}} \wedge$ $\wedge V_{Max}^{App} < \min \left( \frac{k_{Alt} k_{Cond}}{k_{Sulf}}, k_{Cond} Prx_T, k_{Red} Prx_T Trx_T \right) \wedge Trx_T > K_M$                                                                                                                                                                       |

301 2.2. Inventory of the qualitatively distinct arrangements of phenotypic  
 302 regions and responses

303 The qualitatively distinct arrangements (relative positions) of the phenotypic regions in  
 304 the various slices of the  $(v_{sup}, V_{Max}^{App})$  plane [or similarly, in the  $(\phi^*, \sigma^*)$  plane, in logarithmic  
 305 scaled coordinates, as per Section 1] determines a set of qualitatively different responses to  $v_{sup}$   
 306 and to TrxR inhibition. In what follows we are only interested in *generic* arrangements; that is in  
 307 those that do not hold just for a specific pointwise condition. In order to enumerate all the  
 308 qualitatively distinct arrangements we proceeded as follows. These relative positions are

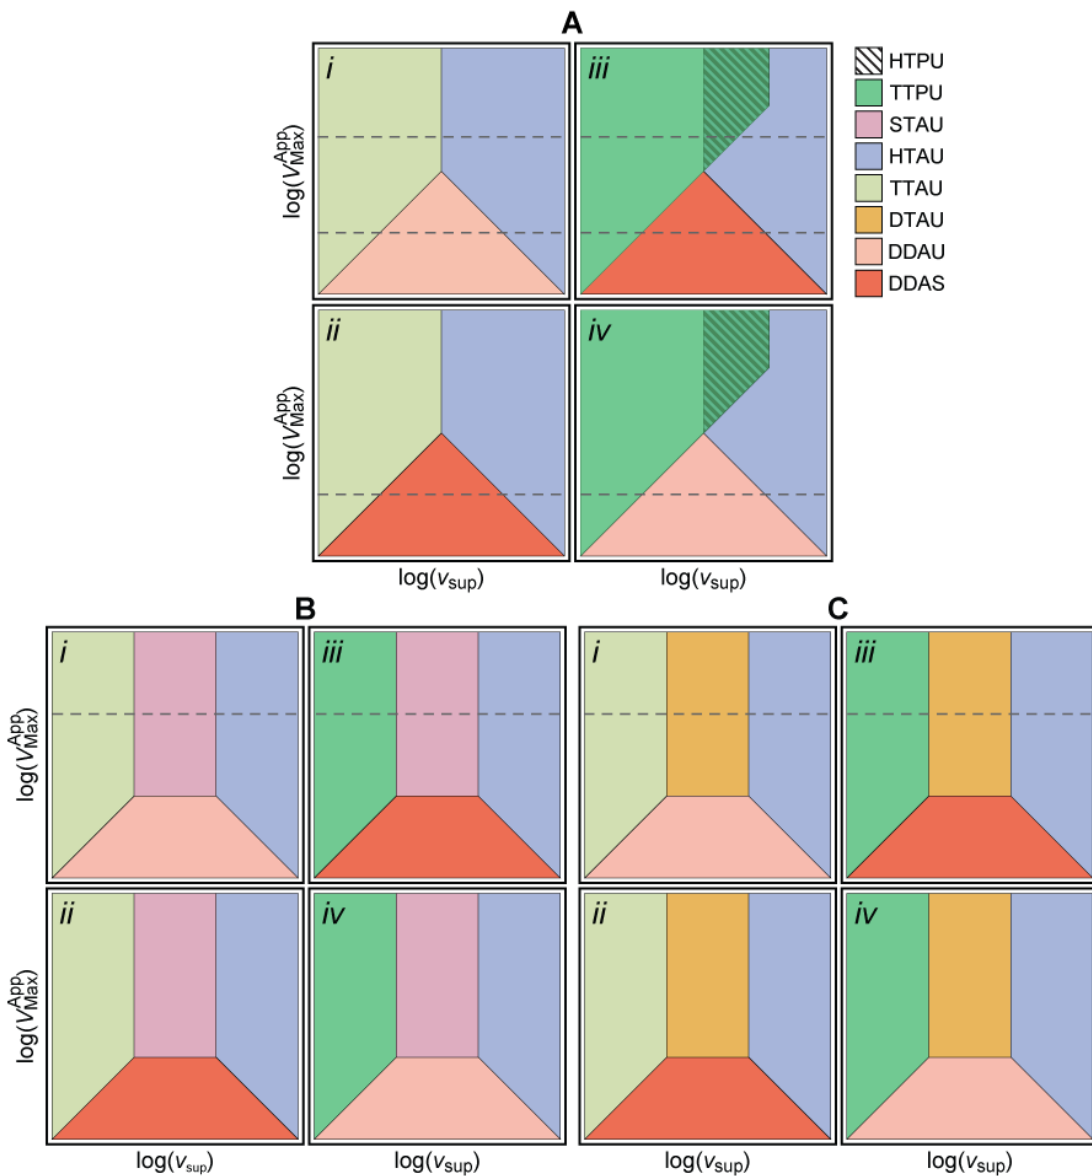

**Supplementary Figure 2.** The generic qualitatively different arrangements of phenotypic regions for slices in the  $(v_{sup}, V_{Max}^{App})$  plane. The gray dashed lines illustrate the ten generic qualitatively different responses to  $v_{sup}$ .

309 determined by the set of relationships in Supplementary Table 2. More concretely, by the  
 310 relative values of the various sub-expressions entering the inequalities. Expressed in terms of  
 311 the logarithms of the scaled parameters introduced in Section 1, these inequalities can be  
 312 written as function of the following 9 quantities:

$$313 \quad \rho^*, \chi^*, 0, \alpha^* - \beta^*, \alpha^* - \psi^* + \eta^*, \beta^* - \psi^* + \eta^*, \frac{\alpha^* - \beta^*}{2}, \frac{\alpha^* - \psi^* + \eta^*}{2}, \frac{\beta^* - \psi^* + \eta^*}{2} \quad (32)$$

314 There can be  $9! = 362\,880$  distinct orderings of these quantities, (e.g.,  $\rho^* < \chi^* < 0 < \alpha^* - \beta^* <$   
 315  $< \alpha^* - \psi^* + \eta^* < \beta^* - \psi^* + \eta^* < \frac{\alpha^* - \beta^*}{2} < \frac{\alpha^* - \psi^* + \eta^*}{2} < \frac{\beta^* - \psi^* + \eta^*}{2}$ ), each of which  
 316 corresponding to one subsector of the full-dimensional design space. However, only 1152 of  
 317 these orderings (subsectors) satisfy the plausibility constraints introduced in Section 2.1. Each  
 318 ordering is consistent with one and only one arrangement of the phenotypic regions in the  
 319  $(\phi^*, \sigma^*)$  plane. After examining all the 1152 biologically plausible orderings, we find that only  
 320 the 12 arrangements shown in Supplementary Figure 2 are possible. Combining this analysis  
 321 with that of the properties that characterize each region (as per Supplementary Table 1 and  
 322 Table 1) these 12 arrangements can be grouped by similarity of the responses at high  $V_{Max}^{App}$  into  
 323 three major families (A, B, C) as follows. In family A (Supplementary Figure 2A), increasing  $v_{sup}$   
 324 leads directly from a region where Prx-S<sup>-</sup> is the dominant Prx form (TTPU or TTAU) to region  
 325 HTAU, where Prx-SO<sub>2</sub><sup>-</sup> is the dominant Prx form. In turn, families B (Supplementary Figure 2B)  
 326 and C (Supplementary Figure 2C) are characterized by regions at intermediate  $v_{sup}$  where Prx  
 327 accumulates in Prx-SO<sup>-</sup> or Prx-SS forms, respectively. Each of these families has four variants  
 328 (*i-iv*), characterized by the nature of the basal (*i.e.*, low  $v_{sup}$ ) state and by TrxR saturation at  
 329 intermediate  $v_{sup}$  and low  $V_{Max}^{App}$ .

330 The necessary and sufficient conditions for each arrangement to hold are straightforwardly  
 331 derived as the reunion of all subsectors that are consistent with it (*i.e.*, ORing all the consistent  
 332 ordering conditions). The conditions for the four arrangements that are represented in our  
 333 sample of cell types are presented in Figure 2.

334 One can recognize 10 qualitatively different generic responses to  $v_{sup}$  (Supplementary Figure 2,  
 335 Figure 2), defined by as many different region sequences. The conditions for occurrence of each  
 336 of these responses are shown in Supplementary Table 3.

| Response* | Sequence             | Condition                                                                                                                                                                                                                                                    |
|-----------|----------------------|--------------------------------------------------------------------------------------------------------------------------------------------------------------------------------------------------------------------------------------------------------------|
| A         | TTAU → HTAU          | $\frac{k_{Ox}}{k_{Cond} k_{Sulf}} k_{Srx} < \frac{k_{Ox} Prx_T}{k_{Alt}} < 1 \wedge \sqrt{\frac{k_{Cond} k_{Ox}}{k_{Sulf}}} k_{Srx} Prx_T < \min \left( k_{Red} Trx_T Prx_T, V_{Max}^{App}, V_{Max}^{App} \frac{Trx_T}{K_M} \right)$                         |
| P         | TTPU → (HTPU) → HTAU | $\max \left( k_{Srx} Prx_T, \sqrt{\frac{k_{Cond}}{k_{Sulf}}} k_{Srx} k_{Alt} Prx_T \right) < \min \left( k_{Cond} Prx_T, \sqrt{\frac{k_{Cond} k_{Ox}}{k_{Sulf}}} k_{Srx} Prx_T, k_{Red} Prx_T Trx_T, V_{Max}^{App}, \frac{V_{Max}^{App}}{K_M} Trx_T \right)$ |
| AS        | TTAU → STAU → HTAU   | $k_{Cond} Prx_T < \min \left( k_{Red} Trx_T Prx_T, \frac{k_{Ox} k_{Srx}}{k_{Sulf}} Prx_T, V_{Max}^{App}, V_{Max}^{App} \frac{Trx_T}{K_M} \right) \wedge k_{Alt} > \max(k_{Ox}, k_{Sulf}) Prx_T$                                                              |
| PS        | TTPU → STAU → HTAU   | $k_{Cond} Prx_T < \min \left( k_{Red} Trx_T Prx_T, \frac{k_{Alt} k_{Srx}}{k_{Sulf}}, V_{Max}^{App}, V_{Max}^{App} \frac{Trx_T}{K_M} \right) \wedge k_{Sulf} Prx_T < k_{Alt} < k_{Ox} Prx_T$                                                                  |
| AD        | TTAU → DTAU → HTAU   | $k_{Red} Trx_T Prx_T < \min \left( k_{Cond} Prx_T, \frac{k_{Cond}}{k_{Sulf}} k_{Alt}, \sqrt{\frac{k_{Cond} k_{Ox}}{k_{Sulf}}} k_{Srx} Prx_T, V_{Max}^{App}, V_{Max}^{App} \frac{Trx_T}{K_M} \right) \wedge k_{Alt} > k_{Ox} Prx_T$                           |
| PD        | TTPU → DTAU → HTAU   | $k_{Red} Trx_T Prx_T < \min \left( k_{Cond} Prx_T, \frac{k_{Cond}}{k_{Sulf}} k_{Alt}, \sqrt{\frac{k_{Cond}}{k_{Sulf}}} k_{Srx} k_{Alt} Prx_T, V_{Max}^{App}, V_{Max}^{App} \frac{Trx_T}{K_M} \right) \wedge k_{Alt} < k_{Ox} Prx_T$                          |
| ADU       | TTAU → DDAU → HTAU   | $V_{Max}^{App} < \frac{K_M}{Trx_T} \min \left( k_{Cond} Prx_T, k_{Red} Trx_T Prx_T, \frac{k_{Cond}}{k_{Sulf}} k_{Alt}, \sqrt{\frac{k_{Cond} k_{Ox}}{k_{Sulf}}} k_{Srx} Prx_T \right) \wedge k_{Alt} > k_{Ox} Prx_T \wedge Trx_T < K_M$                       |
| PDU       | TTPU → DDAU → HTAU   | $V_{Max}^{App} < \frac{K_M}{Trx_T} \min \left( k_{Cond} Prx_T, k_{Red} Trx_T Prx_T, \frac{k_{Cond}}{k_{Sulf}} k_{Alt}, \sqrt{\frac{k_{Cond}}{k_{Sulf}}} k_{Srx} k_{Alt} Prx_T \right) \wedge k_{Alt} < k_{Ox} Prx_T \wedge Trx_T < K_M$                      |
| ADS       | TTAU → DDAS → HTAU   | $V_{Max}^{App} < \min \left( k_{Cond} Prx_T, k_{Red} Trx_T Prx_T, \frac{k_{Cond}}{k_{Sulf}} k_{Alt}, \sqrt{\frac{k_{Cond} k_{Ox}}{k_{Sulf}}} k_{Srx} Prx_T \right) \wedge k_{Alt} > k_{Ox} Prx_T \wedge Trx_T > K_M$                                         |
| PDS       | TTPU → DDAS → HTAU   | $V_{Max}^{App} < \min \left( k_{Cond} Prx_T, k_{Red} Trx_T Prx_T, \frac{k_{Cond}}{k_{Sulf}} k_{Alt}, \sqrt{\frac{k_{Cond}}{k_{Sulf}}} k_{Srx} k_{Alt} Prx_T \right) \wedge k_{Alt} < k_{Ox} Prx_T \wedge Trx_T > K_M$                                        |

338 \*Responses are named as follows: 1<sup>st</sup> character: basal (low  $v_{sup}$ ) state: A = TTAU, P = TTPU. 2<sup>nd</sup> character: dominant Prx form in the intermediate  $v_{sup}$  region  
339 if one exists: S = Prx-SO, D = Prx-SS. 3<sup>rd</sup> character: TrxR saturation if Trx-SS is the dominant Trx form in the intermediate region: S = saturated, U = unsaturated.



### 340 3. Parameter Estimations

#### 341 3.1. Estimation of protein concentrations in human cells from proteomic 342 datasets

343 Where more reliable determinations were lacking, we estimated protein concentrations  
344 in human cell lines based on the proteomic dataset from Geiger *et al.* [12] as reported in the  
345 Proteomaps database (<http://www.proteomaps.net/>) [13]. Geiger *et al.* [12] report the  
346 absolute protein abundance estimates for eleven human cell lines. The data for all these cell  
347 types was obtained through the same methods in a single lab, and applying the most accurate  
348 approach for proteome-scale absolute protein quantification. Furthermore, most proteins of  
349 the PTTRS are very abundant and can thus be more precisely quantified than most other  
350 proteins.

351 The estimates follow the method of Milo *et al.* [14]. They are based on the observation that  
352 most mammalian cells have a mean protein density of 0.2 g/mL cell volume [15,16]. For  
353 instance, Jurkat T cells contain 0.14 mg protein/ $10^6$  cells [17], which translates into  $C_p = 0.21$   
354 g/mL, considering a mean Jurkat T cell volume of  $6.6 \pm 0.46 \times 10^{-13} \text{ dm}^3$  [18]. Then, considering  
355 that an average human protein contains 375 aminoacyl residues ( $\overline{Laa}$  below) [19], and a mean  
356 molecular weight of 110 Da per aminoacid, and that only about  $f_{water} = 0.7$  of the cell volume  
357 is occupied by water [20] we obtain the following average concentration of total protein in a  
358 human cell:

$$359 \quad C_{tot} = \frac{0.21 \text{ (g/mL)}}{0.7 \times 110 \text{ (Da)} \times 375 \text{ (aa)}} = 7.0 \text{ mM} \quad (33)$$

360 Knowing the mass fraction ( $\varphi_{Prot}$ , expressed as “size weighted abundance” in the Proteomaps  
361 database) and its primary sequence length ( $Laa_{Prot}$ ) one can then calculate its concentration  
362 by applying the following formula:

$$363 \quad C_{Prot} = \frac{\varphi_{Prot} C_{tot}}{\frac{Laa_{Prot}}{\overline{Laa}}} \quad (34)$$

364 Wiśniewski *et al.* [21] performed a quantitative proteomic analysis of human hepatocytes and  
365 of HepG2 cells and expressed their results ( $c_{Prot}$ ) as nmol/mg total protein. In order to refer  
366 these concentrations to cell water volume we apply the following conversion:

$$C_{\text{Prot}} = \frac{C_p}{f_{\text{water}}} c_{\text{Prot}} = 2.9 \times 10^2 (\text{g dm}^{-3}) \times 10^{-9} (\text{mol nmol}^{-1}) \times c_{\text{Prot}} .$$

368 Many of the proteins of interest in this study are confined to the cytoplasm. Their cytoplasmic  
 369 concentration can be readily estimated by dividing  $C_{\text{Prot}}$  by the cytoplasm volume fraction,  
 370  $f_{\text{cytoplasm}}$ . A few other proteins are distributed by other compartments as well, and in these  
 371 cases we assume that their concentration is identical in the various compartments. Therefore,  
 372 unless otherwise stated we estimate their cytoplasmic concentration by dividing  $C_{\text{Prot}}$  by the  
 373 sum of the volumes of the compartments where the protein is present. Subcellular localizations  
 374 were obtained from the Uniprot database (<http://www.uniprot.org/>) [22], neglecting those that  
 375 were just electronically inferred and not confirmed experimentally. Compartment volume  
 376 fractions were estimated from the literature, or  $f_{\text{cytoplasm}} = f_{\text{nucleus}} = 0.5$  was assumed when no  
 377 data was available (Supplementary Table 4).

378 **Supplementary Table 4. Cell volume fractions of nucleus and cytoplasm for human cells.**

|                   | <b>Cell type</b>         | $f_{\text{nucleus}}$ | $f_{\text{cytoplasm}}$ | <b>Ref.</b>         |
|-------------------|--------------------------|----------------------|------------------------|---------------------|
| <b>Jurkat T</b>   | Acute T-Cell leukemia    | 0.6                  | 0.3                    | [18] <sup>a</sup>   |
| <b>A549</b>       | Lung carcinoma           | 0.28                 | 0.72                   | [23]                |
| <b>GaMG</b>       | Glioblastoma             | 0.5                  | 0.5                    | <sup>b</sup>        |
| <b>HEK293</b>     | Embryonic kidney cells   | 0.56                 | 0.44                   | [24]                |
| <b>HeLa</b>       | Cervical carcinoma       | 0.18                 | 0.78                   | [25]                |
| <b>HepG2</b>      | Hepatoma                 | 0.25                 | 0.63                   | [21] <sup>c,d</sup> |
| <b>K562</b>       | Chronic myeloid leukemia | 0.5                  | 0.5                    | [26] <sup>e</sup>   |
| <b>LnCap</b>      | Prostate carcinoma       | 0.44                 | 0.56                   | [27] <sup>f</sup>   |
| <b>MCF-7</b>      | Mammary carcinoma        | 0.53                 | 0.47                   | [28]                |
| <b>RKO</b>        | Colon carcinoma          | 0.5                  | 0.5                    | <sup>b</sup>        |
| <b>U2-OS</b>      | Osteosarcoma             | 0.5                  | 0.5                    | [29] <sup>f</sup>   |
| <b>Hepatocyte</b> |                          | 0.10                 | 0.53                   | [21] <sup>c,g</sup> |

379 <sup>a</sup> Mitochondria account for 5% of cell volume.

380 <sup>b</sup> Assumed.

381 <sup>c</sup> Estimate based on relative protein masses in each compartment.

382 <sup>d</sup> Mitochondria account for 12% of cell volume, as inferred from protein mass.

383 <sup>e</sup> Estimated by visual inspection of microscopy images.

384 <sup>f</sup> Estimated using 2D-area data to approximate the partition of the intracellular space in cytoplasm and nucleus.

385 <sup>g</sup> Mitochondria and endoplasmic reticulum + Golgi account for 25% and 12% of cell volume, respectively, as inferred  
 386 from protein mass.



### 387 3.2. Estimations for Jurkat T Cells

388 Jurkat T are arguably the nucleated human cells where the PTTRS has been most  
 389 thoroughly characterized. For this reason, we used them as a reference for the estimation of the  
 390 parameters for other nucleated human cell types. In the sections below we also discuss  
 391 information for these other cells, where available.

#### 392 3.2.1. H<sub>2</sub>O<sub>2</sub> Permeability

393 Cells' permeability to H<sub>2</sub>O<sub>2</sub> can be determined from the experimentally observable  
 394 decay exponent of extracellular H<sub>2</sub>O<sub>2</sub> provided that the internal H<sub>2</sub>O<sub>2</sub> consumption activity is  
 395 either known or sufficient to outcompete the H<sub>2</sub>O<sub>2</sub> efflux and the morphometric parameters are  
 396 available (see *eg.* [30]). Based on the diagram in Supplementary Figure 3, the dynamics of  
 397 permeation can be described by the following model:

$$\begin{aligned}
 \frac{d H_2O_{2,out}}{dt} &= \frac{n_{cells} \kappa_p S}{V_{medium}} (H_2O_{2,in} - H_2O_{2,out}) \\
 \frac{d H_2O_{2,in}}{dt} &= \frac{\kappa_p S}{V_{in}} (H_2O_{2,out} - H_2O_{2,in}) - k_{sink} H_2O_{2,in}.
 \end{aligned}
 \tag{35}$$

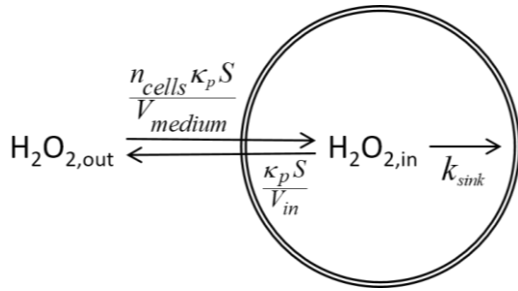

Supplementary Figure 3. Model for cell permeation by H<sub>2</sub>O<sub>2</sub>.

Here,  $n_{cells}$  stands for the number of cells per medium volume  $V_{medium}$ ,  $\kappa_p$  stands for the permeability constant,  $S$  and  $V_{in}$  stand for the permeant surface area and cytoplasmic water volume, and  $k_{sink}$  stands for the pseudo-first order rate constant for H<sub>2</sub>O<sub>2</sub> consumption in the cytoplasm. After a short time period in the order

406 of  $1 / \left( k_{sink} + \frac{\kappa_p S}{V_{in}} \right)$ ,  $H_2O_{2,in}$  approaches a quasi-steady state

$$H_2O_{2,in}(t) = \frac{H_2O_{2,out}(t)}{1 + \frac{k_{sink} V_{in}}{\kappa_p S}}.$$

408 Replacing this equation into equation (35) and integrating yields

$$H_2O_{2,out}(t) = H_2O_{2,out}(0) e^{-k_{cells} t}, \tag{36}$$

410 with

411 
$$k_{cells} = \frac{n_{cells}}{V_{medium}} \frac{\kappa_p S}{1 + \frac{\kappa_p S}{k_{sink} V_{in}}} \quad (37)$$

412 being the decay exponent. It follows from this equation that under experimental conditions  
 413 where cells retain sufficient cytoplasmic H<sub>2</sub>O<sub>2</sub> clearance activity to strongly outcompete the H<sub>2</sub>O<sub>2</sub>  
 414 efflux (*i.e.*,  $k_{sink} \gg \frac{\kappa_p S}{V_{in}}$ ) the permeability per cell —  $\kappa_p \times S$  — and the pseudo-first order rate  
 415 constant for H<sub>2</sub>O<sub>2</sub> influx ( $k_{inf}$ ) can be straightforwardly computed from  $k_{cells}$  :

416 
$$\kappa_p \times S = \frac{V_{medium}}{n_{cells}} k_{cells}, \quad (38)$$

417 
$$k_{inf} = \frac{\kappa_p S}{V_{in}} . \quad (39)$$

418 These conditions are met in experiments where H<sub>2</sub>O<sub>2</sub> concentrations in the medium are kept  
 419 low enough to avoid extensive oxidation of the Prx and other peroxidases, or where cells have  
 420 a high cytoplasmic catalase activity. A  $k_{sink} \geq 100 \text{ s}^{-1}$  would warrant accurate determinations.  
 421 This is achieved if the Prx are no more than 70% oxidized or inhibited, or if cells contain abundant  
 422 cytoplasmic Cat activity. The latter is the case for human erythrocytes, which permitted  
 423 estimating  $\kappa_p = 5.8 \times 10^{-5} \text{ dm s}^{-1}$  and  $k_{inf} = 11. \text{ s}^{-1}$  [31].

424 However, the following observations indicate that the conditions above are not met in most  
 425 determinations of  $k_{cells}$  published so far [e.g. ,32–35]. Determinations of  $k_{cells}$  for a variety of  
 426 cell lines strongly correlate with cells' Cat activity [35], and inhibition of Cat with 3-aminotriazole  
 427 decreases the value of  $k_{cells}$  by 1.2 to 4.6-fold, for determinations based on high H<sub>2</sub>O<sub>2</sub> doses per  
 428 cell [34,35]. Should these values of  $k_{cells}$  be determined by the cells' permeability they would  
 429 be virtually independent of the Cat activity.

430 Likewise, all the determinations of  $k_{cells}$  of HEK293 in ref. [33] were done under conditions  
 431 where PrxII (and presumably also PrxI) was mostly oxidized. Because in HEK293 cells, as in most  
 432 other human cells, Cat is confined within peroxisomes, it cannot effectively compete with the  
 433 H<sub>2</sub>O<sub>2</sub> efflux. The value of  $k_{cells}$  should thus reflect not the permeability of the cell membrane  
 434 but the activity of Cat (limited by permeation of the peroxisomal membrane) plus some residual  
 435 peroxidase activity.

436 In lack of information about the value of  $k_{sink}$  that applies under these conditions, the value of  
 437  $k_{cells}$  can provide just lower bounds for the permeability and influx rate constant ( $k_{inf}$ ). Such a  
 438 lower bound for  $k_{inf}$  in HEK293 cells can be obtained based on the observation [33] that  $1.5 \times 10^6$   
 439 cells grown on 2.5 mL of medium consume  $H_2O_2$  with  $k_{cells} = 1.35 \times 10^{-3} s^{-1}$ , considering a  
 440  $V_{cytoplasm} = 8.22 \times 10^{-13} dm^3$  [24] and a water content of 0.7 mL water/mL cell:

$$441 \quad k_{inf} > \frac{V_{medium}}{n_{cells} f_{water} V_{cytoplasm}} k_{cells} = \frac{2.5 \times 10^{-3} dm^3}{(1.5 \times 10^6 \text{ cells}) \times 0.7 \times (8.22 \times 10^{-13} dm^3)} 1.35 \times 10^{-3} s^{-1} = 3.9 s^{-1}.$$

442

443 On the other hand, if the  $H_2O_2$  efflux cannot be neglected but  $k_{sink}$  is known, equation (37)  
 444 yields:

$$445 \quad \kappa_p S = \frac{1}{\frac{n_{cells}}{k_{cells} V_{medium}} - \frac{1}{k_{sink} V_{in}}}. \quad (40)$$

446 Under the assumption that at the high extracellular  $H_2O_2$  used  $k_{sink}$  is determined by the joint  
 447 activities of GPx and Cat, Antunes and Cadenas [30] determined the permeability of the Jurkat  
 448 T cell membrane as  $\kappa_p = 2 \times 10^{-5} dms^{-1}$ . Considering a mean Jurkat T cell volume  
 449  $V = 6.6 \times 10^{-13} dm^3$ , a surface area  $S = 3.7 \pm 1.7 \times 10^{-8} dm^2$ , a cytoplasmic to cell volume fraction  
 450  $f_{Cytoplasm} \approx 0.3$  [18] and a water content of 0.7 mL water/mL cell, one obtains a first order rate  
 451 constant for  $H_2O_2$  influx from the extracellular medium into the cytoplasm of:

$$452 \quad k_{inf} = \frac{\kappa_p \times S}{f_{water} \times f_{cytoplasm} \times V_{cell}} = \frac{2 \times 10^{-5} (dms^{-1}) \times 3.7 \times 10^{-8} (dm^2)}{0.7 \times 0.3 \times 6.6 \times 10^{-13} (dm^3)} = 5.2 s^{-1}. \quad (41)$$

453 The values of  $\kappa_p$  and  $k_{inf}$  for HeLa and MCF-7 cells can also be estimated under the same  
 454 assumption about  $k_{sink}$  from data provided by references [36] and [37]. For HeLa cells, replacing

$$455 \quad \frac{V_{medium}}{n_{cells}} k_{cells} = (0.50 \pm 0.017) mL / 10^6 \text{ cells} / \text{min} = (8.3 \pm 0.28) \times 10^{-12} dm^3 \text{ cell}^{-1} s^{-1} \quad [36],$$

$$456 \quad k_{sink} = k_{GPx} + k_{Cat} = 86. s^{-1} \quad (\text{Sections } 3.2.2.1 \quad \text{and} \quad 3.2.2.4) \quad \text{and}$$

$$457 \quad V_{in} = f_{water} \times V_{cytoplasm} = 0.7 \times 9.4 \times 10^{-13} dm^3 = 6.6 \times 10^{-13} dm^3 \quad [25] \text{ into equations (40) and (39)}$$

458 yields

$$459 \quad \kappa_p S = 9.7 \times 10^{-12} dm^3 \text{ cell}^{-1} s^{-1},$$

$$k_{inf} = 15. s^{-1}.$$

460 Considering a surface area  $S = 3.7 \times 10^{-8} \text{ dm}^2$  [25] one obtains  $\kappa_p = 2.6 \times 10^{-4} \text{ dm s}^{-1}$ .

461 Huang & Sikes [32] performed similar experiments for HeLa cells, which through similar  
462 calculations yield values in good agreement:  $\kappa_p S = 5.1 \times 10^{-12} \text{ dm}^3 \text{ cell}^{-1} \text{ s}^{-1}$ ,  $k_{inf} = 9.9 \text{ s}^{-1}$ ,  
463  $\kappa_p = 1.4 \times 10^{-4} \text{ dm s}^{-1}$ . We will thus consider the geometric mean  $k_{inf} = 12.0 \text{ s}^{-1}$  as reference for  
464 these cells.

465 For MCF-7 cells, from the values  $\frac{V_{medium}}{n_{cells}} k_{cells} = (0.43 \pm 0.015) \text{ mL} / 10^6 \text{ cells} / \text{min} =$   
466  $= (7.1 \pm 0.25) \times 10^{-12} \text{ dm}^3 \text{ cell}^{-1} \text{ s}^{-1}$  [37],  $k_{sink} = k_{GPx} + k_{Cat} = 14. \text{ s}^{-1}$  (Sections 3.2.2.1 and 3.2.2.4)  
467 and  $V_{in} = f_{water} \times V_{cytoplasm} = 0.7 \times 1.0 \times 10^{-12} \text{ dm}^3 = 7.3 \times 10^{-13} \text{ dm}^3$ ,  $S = 7.6 \times 10^{-8} \text{ dm}^2$  [28] we  
468 obtain:

$$\begin{aligned} \kappa_p S &= 1.4 \times 10^{-11} \text{ dm}^3 \text{ cell}^{-1} \text{ s}^{-1}, \\ 469 \quad k_{inf} &= 14. \text{ s}^{-1}, \\ \kappa_p &= 1.9 \times 10^{-4} \text{ dm s}^{-1}. \end{aligned}$$

470 As we are unaware of  $k_{inf}$  estimations for any other human cells and the results above suggest  
471 that this parameter does not vary widely among cell types, we assume a  $k_{inf} = 10. \text{ s}^{-1}$ , the  
472 geometric mean of the values for the four cell types discussed above, for all other human cells  
473 in this work.

### 474 3.2.2. Alternative H<sub>2</sub>O<sub>2</sub> sinks

475 The capacity of Jurkat T cells to clear cytoplasmic H<sub>2</sub>O<sub>2</sub> through processes other than  
476 reduction by PrxI and PrxII is arguably the most uncertain parameter in the model. However,  
477 despite all the uncertainties one can ascertain that at low oxidative loads their aggregated  
478 contribution is much lower than the pseudo-first order rate constant for H<sub>2</sub>O<sub>2</sub> reduction by Prx:  
479  $k_{Prx} = 4. \times 10^7 \text{ M}^{-1} \text{ s}^{-1} \times (1.2 \times 10^{-4} + 4.6 \times 10^{-5}) \text{ M} = 6.6 \times 10^3 \text{ s}^{-1}$ . (This calculation is based on the  
480 PrxI and PrxII concentrations estimated in Section 3.2.3.) At least five other processes that will  
481 be discussed in the subsections below may contribute for H<sub>2</sub>O<sub>2</sub> clearance.

#### 482 3.2.2.1. Reduction by glutathione peroxidase

483 At low to moderate H<sub>2</sub>O<sub>2</sub> supply rates the kinetics of glutathione peroxidase 1 (GPx1) is  
484 well approximated by a simple mass action rate expression, as demonstrated by the following  
485 considerations. GPx1 follows ping-pong kinetics with rate expression [38]

$$486 \quad v_{GPx1} = \frac{GPx1}{\frac{\Phi_1}{H_2O_2} + \frac{\Phi_2}{GSH}}.$$

487 This rate expression can be rearranged as

$$488 \quad v_{GPx1} = \frac{\frac{GPx1}{\Phi_2} GSH \times H_2O_2}{\frac{\Phi_1}{\Phi_2} GSH + H_2O_2},$$

489 highlighting that the apparent Michaelis constant for  $H_2O_2$  is given by  $K_M^{App}(H_2O_2) = \frac{\Phi_1}{\Phi_2} GSH$ .

490 Considering the value  $\Phi_1 / \Phi_2 = 5.6 \times 10^{-3}$  determined for human GPx1 [39] and 3 mM GSH, one  
 491 obtains  $K_M^{App}(H_2O_2) = 17. \mu M$ . Such a high intracellular  $H_2O_2$  concentration is unlikely to be  
 492 approached except under strong oxidative stress.

493 Antunes and Cadenas [30] determined the pseudo-first-order rate constant for this process in  
 494 Jurkat T cells as  $4.1 s^{-1}$ . From the activity per cell determinations for HeLa [36] and MCF-7 [37]  
 495 —  $3.18 \pm 0.45 \text{ mL/min}/10^6 \text{ cells}$  and  $0.41 \pm 0.063 \text{ mL/min}/10^6 \text{ cells}$ , respectively — we estimate the  
 496 pseudo-first-order rate constants  $80. s^{-1}$  and  $6.8 s^{-1}$ , considering the respective cell volumes  
 497  $9.4 \times 10^{-13} \text{ dm}^3$  [25] and  $1.1 \times 10^{-12} \text{ dm}^3$  [28], the cytoplasm volume fractions in Supplementary  
 498 Table 4 and a cell water volume fraction of 0.7. Huang & Sikes [32] made similar determinations  
 499 for HeLa cells, which through similar calculations yield a pseudo-first order rate constant of  
 500  $67. s^{-1}$ . We will thus consider the geometric mean of these determinations —  $73. s^{-1}$  — as  
 501 reference for this parameter in HeLa cells.

### 502 3.2.2.2. Reduction by peroxiredoxin VI

503 Recent proteomic studies [12] point to a substantial concentration of the 1-Cys  
 504 peroxiredoxin PrxVI in Jurkat T cells. Using the estimation method described in Section 3.1 we  
 505 obtain:

$$506 \quad PrxVI = \frac{\varphi_{PrxVI} C_{tot}^{Jurkat}}{f_{cytoplasm} \frac{Laa_{PrxVI}}{Laa}} = \frac{6.4 \times 10^{-4} \times 7.0 \times 10^{-3} (M)}{0.3 \frac{224}{375}} = 25. \mu M$$

507 Considering a rate constant for  $H_2O_2$  reduction of  $k_{Ox,PrxVI} = 3 \times 10^6 M^{-1} s^{-1}$  [40], this translates  
 508 into a pseudo-first-order rate constant of  $k_{PrxVI} = 3.0 \times 10^6 (M^{-1} s^{-1}) \times 25. \times 10^{-6} (M) = 75. s^{-1}$   
 509 when all the protein is in thiolate form.

510 Upon reaction with  $H_2O_2$  the active site thiolate is oxidized to a sulfenate whose reduction is  
 511 dependent on glutathionylation by GSH-loaded glutathione S-transferase  $\pi$  [41,42], which is also  
 512 abundant in Jurkat T cells [13]. At high  $H_2O_2$  concentrations the rate-limiting step in the catalytic  
 513 cycle is quite likely the reduction of the glutathionylated PrxVI molecule by another GSH

514 molecule [41]. Therefore, the contribution of PrxVI for H<sub>2</sub>O<sub>2</sub> reduction will decrease when GSH  
515 is depleted.

### 516 3.2.2.3. Reduction by other thiol proteins

517 Hansen *et al.* [43] showed that the concentration of oxidizable protein thiols in human  
518 cell lines is in the order of 10 mM, which is comparable or higher than GSH concentrations.  
519 However, the use of diamide as oxidizing agent in this study may have caused a substantial over-  
520 estimation of the concentration of thiols that can potentially react with H<sub>2</sub>O<sub>2</sub>. This because  
521 diamide can oxidize thiols to –RS<sup>+</sup>, which in turn readily react with other thiols.[44] In contrast,  
522 H<sub>2</sub>O<sub>2</sub> can react at significant rates with thiolates but not with protonated thiols. Considering the  
523 mean protonation state under physiological pH, protein thiols are expected to react with H<sub>2</sub>O<sub>2</sub>  
524 at rate constants  $\approx 1 \text{ M}^{-1}\text{s}^{-1}$  or lower, similar to GSH [ $k = 0.87 \text{ M}^{-1}\text{s}^{-1}$  [45]]. Other than those in  
525 the active centers of peroxidases and peroxiredoxins, few protein thiols characterized to date  
526 have H<sub>2</sub>O<sub>2</sub> reactivities in excess of  $200 \text{ M}^{-1}\text{s}^{-1}$  [46,47]. Accordingly, a study analyzing the profile  
527 of thiol reactivities under more controlled conditions has shown that only a small fraction of the  
528 protein thiols are very reactive [48]. Likewise, redox proteomic studies of various cell types and  
529 organisms show few thiol proteins being oxidized in response to H<sub>2</sub>O<sub>2</sub> boluses [49–51].

530 The considerations above and the fact that Prx are both very reactive and very abundant suggest  
531 that the overall contribution of protein thiols other than those in the active centers of  
532 peroxidases and peroxiredoxins for H<sub>2</sub>O<sub>2</sub> clearance is modest. The following observations further  
533 support this notion. First, other very abundant proteins are not very H<sub>2</sub>O<sub>2</sub>-reactive. Only 6  
534 cytoplasmic proteins are more abundant than PrxI + PrxII in Jurkat T cells [13,52], and among  
535 these, glyceraldehyde 3-phosphate dehydrogenase (GAPDH) has been flagged as the most  
536 prominent H<sub>2</sub>O<sub>2</sub> target in a redox proteomic study,[49] indicating that the few more abundant  
537 proteins are less H<sub>2</sub>O<sub>2</sub>-reactive. Using the method described in Section 3.1 we estimate the  
538 concentration of GAPDH as  $\approx 71 \text{ }\mu\text{M}$ . This protein reacts with H<sub>2</sub>O<sub>2</sub> with a rate constant  $500 \text{ M}^{-1}\text{s}^{-1}$   
539 [53,54]. Hence, the pseudo-first order rate constant for H<sub>2</sub>O<sub>2</sub> reduction by this protein is a  
540 meager  $k_{GAPDH} = 0.036\text{s}^{-1}$ .

541 Second, only two cytoplasmic proteins other than peroxiredoxins and Trx were detected as  
542 significantly reversibly oxidized in response to exposure of a HEK293T cell culture to a 50  $\mu\text{M}$   
543 H<sub>2</sub>O<sub>2</sub> bolus for 5 min, in a redox proteomics study that was able to quantitatively assess the  
544 redox state of 404 thiol proteins.[51] Those oxidized proteins were GAPDH and proteasome  
545 subunit  $\alpha$  type 1. Because the bolus was sufficient to extensively oxidize both PrxI and PrxII,[51]  
546 intracellular H<sub>2</sub>O<sub>2</sub> concentrations should have increased very substantially during the pulse.

547 Third, although the redox-proteomic studies mentioned in the previous paragraph are biased  
548 towards abundant proteins it is unlikely that the set of less abundant H<sub>2</sub>O<sub>2</sub>-reactive proteins  
549 contributes significantly for H<sub>2</sub>O<sub>2</sub> clearance. Indeed, even generously considering a total of  
550 10 mM H<sub>2</sub>O<sub>2</sub>-oxidizable thiols at a 500 M<sup>-1</sup>s<sup>-1</sup> mean reactivity would amount to a pseudo-first  
551 order rate constant  $k_{RSH} = 5 \text{ s}^{-1}$  for H<sub>2</sub>O<sub>2</sub> consumption, which is still less than other reductants  
552 discussed in this section.

553 Nevertheless, a quantitative analysis based on a mathematical model for H<sub>2</sub>O<sub>2</sub> metabolism in  
554 Jurkat T cells [55] suggested that these cells contain an abundant pool (1 mM) of quite reactive  
555 ( $5 \times 10^5 \text{ M}^{-1}\text{s}^{-1}$ ) protein thiols, amounting to a substantial  $k_{RSH} = 5 \times 10^2 \text{ s}^{-1}$ . More recently, a  
556 thorough analysis of the redox response of the 2-Cys peroxiredoxin Tpx1 from the fission yeast  
557 *Schizosaccharomyces pombe* to high concentrations of ectopic H<sub>2</sub>O<sub>2</sub> also suggested the  
558 existence of a large ( $\approx 13 \text{ mM}$ ) pool of moderately H<sub>2</sub>O<sub>2</sub>-reactive ( $5 \times 10^2 \text{ M}^{-1}\text{s}^{-1}$ ) protein thiols [56],  
559 yielding  $k_{RSH} = 7. \text{ s}^{-1}$ . Nevertheless, none of these works identified the thiol proteins that might  
560 be oxidized at such rates. And in both cases reactivities and pool sizes were estimated quite  
561 indirectly by fitting complex kinetic models to experimentally determined time courses. Such  
562 estimates are very sensitive to the considerable uncertainties in both data and models. For  
563 instance, estimations in ref. [55] were based on experimental determinations of the redox  
564 potential of GSH that did not account for subcellular distribution of GSSG, which is now known  
565 to be concentrated in lysosomes and present at much lower concentrations in the cytoplasm  
566 [57]. In turn, in ref. [56] the observation of a bi-phasic response of Prx-SO<sub>2</sub><sup>-</sup> and intracellular H<sub>2</sub>O<sub>2</sub>  
567 concentrations in HEK293 to H<sub>2</sub>O<sub>2</sub> boluses has been attributed to saturation of the peroxidases  
568 and a buffering effect from abundant protein thiols. But as we shall see in the main text and in  
569 Section 5 the same bi-phasic behavior is predicted by a model that neglects both these factors.

570 Finally, it should be noted that the pseudo-first order rate constants above represent upper  
571 estimates of the contribution of the protein thiols for H<sub>2</sub>O<sub>2</sub> consumption, as they embody the  
572 assumption that the respective oxidized forms are readily reduced. Otherwise, this thiol pool  
573 will be progressively oxidized, and its contribution for eliminating H<sub>2</sub>O<sub>2</sub> under sustained load  
574 (*i.e.*, at steady state) vanishes. We therefore neglected the contribution of non-peroxidase  
575 protein thiols for H<sub>2</sub>O<sub>2</sub> clearance at steady state.

#### 576 *3.2.2.4. Dismutation by catalase*

577 In Jurkat T cells, as in most human cells, all catalase is contained within peroxisomes. As  
578 consequence, the consumption of cytoplasmic H<sub>2</sub>O<sub>2</sub> by catalase is rate limited by the permeation

579 of the peroxisomal membrane [30]. Taking this fact into account, Antunes and Cadenas [30]  
580 estimated the contribution of catalase for the clearance of cytoplasmic H<sub>2</sub>O<sub>2</sub> as  $k_{Cat} = 0.4 \text{ s}^{-1}$ .

581 From the activity per cell determinations for HeLa [36] and MCF-7 [37] —  $0.21 \pm 0.042$   
582 mL/min/ $10^6$  cells and  $0.42 \pm 0.061$  mL/min/ $10^6$  cells, respectively — we estimate the pseudo-first-  
583 order rate constants  $5.3 \text{ s}^{-1}$  and  $7.0 \text{ s}^{-1}$ , considering the respective cell volumes  $9.4 \times 10^{-13} \text{ dm}^3$  [25]  
584 and  $1.1 \times 10^{-12} \text{ dm}^3$  [28], the cytoplasm volume fractions in Supplementary Table 4 and a cell  
585 water volume fraction of 0.7. Huang & Sikes [32] made similar determinations for HeLa cells,  
586 which through similar calculations yield a pseudo-first-order rate constant of  $1.7 \text{ s}^{-1}$ . We will thus  
587 consider the geometric mean of these determinations —  $3.0 \text{ s}^{-1}$  — as reference for this  
588 parameter in HeLa cells.

### 589 3.2.2.5. Efflux

590 Because the plasma membrane is relatively permeable, part of the H<sub>2</sub>O<sub>2</sub> can leave the  
591 cell. The rate constant for this process is  $k_{effl} = k_{inf} = 5.2 \text{ s}^{-1}$  as determined above.

592 Unlike all the other H<sub>2</sub>O<sub>2</sub> clearance processes discussed above, catalase and the efflux are  
593 virtually non-saturable.[58,59] Therefore, at very high H<sub>2</sub>O<sub>2</sub> supply rates able to saturate all  
594 other processes, cytoplasmic H<sub>2</sub>O<sub>2</sub> will nearly equilibrate with the extracellular environment,  
595 because  $k_{effl} \gg k_{Cat}$ .

596

597 Altogether, the H<sub>2</sub>O<sub>2</sub> clearance capacity through processes other than reduction by the typical  
598 2-Cys peroxiredoxins adds up to:

$$599 \quad k_{Alt} = (4.1 + 75. + 0.4 + 5.2) \text{ s}^{-1} = 85. \text{ s}^{-1}$$

600 at low oxidative loads, and to

$$601 \quad k_{Alt} = (0.40 + 5.2) \text{ s}^{-1} = 5.6 \text{ s}^{-1}$$

602 under strong enough oxidative loads to deplete GSH.

### 603 3.2.3. Peroxiredoxin concentrations and rate constants

604 We consider Prx total concentration as the sum of the concentration of PrxI (Prdx1,  
605 199aa, 22.11 kDa) and PrxII (Prxd2, 196aa, 21.892 kDa) the two main 2-cys cytoplasmic  
606 peroxiredoxin.

607 Rhee *et al.* [60] determined the PrxI and PrxII contents in Jurkat T cells as  $R_{PrxI/T} = 2.7 \text{ } \mu\text{g/mg}$  of  
608 total soluble protein, and  $R_{PrxII/T} = 1.0 \text{ } \mu\text{g/mg}$  of soluble protein. Considering an average cell



609 volume of  $6.6 \times 10^{-13} \text{ dm}^3$  [18], an average protein content of  $210 \text{ g/dm}^3$  [14] and the molecular  
 610 weights of PrxI (22,110 Da) and PrxII (21,892 Da) we obtain, the following concentrations:

$$611 \quad \text{PrxI} = \frac{C_{tot}^{Jurkat} R_{\text{PrxI/T}}}{f_{\text{water}} \times f_{\text{cytoplasm}} \times MW} = \frac{2.1 \times 10^2 (\text{g/dm}^3) \times 2.7 \times 10^{-3} (\text{g PrxII/g})}{0.7 \times 0.3 \times 2.21 \times 10^4 (\text{g/mol})} = 0.12 \text{ mM}$$

$$612 \quad \text{PrxII} = \frac{C_{tot}^{Jurkat} R_{\text{PrxI/T}}}{f_{\text{water}} \times f_{\text{cytoplasm}} \times MW} = \frac{2.1 \times 10^2 (\text{g/dm}^3) \times 1.0 \times 10^{-3} (\text{g PrxII/g})}{0.7 \times 0.3 \times 2.19 \times 10^4 (\text{g/mol})} = 46. \mu\text{M}$$

613 The rate constants for the oxidation of PrxII-S<sup>-</sup> to PrxII-SO<sup>-</sup> and of PrxII-SO<sup>-</sup> to PrxII-SO<sub>2</sub><sup>-</sup>, as well  
 614 as the rate constant for conversion of PrxII-SO<sup>-</sup> to PrxII-SS, were experimentally determined as  
 615  $k_{Ox} = (1.0 \pm 0.1) \times 10^8 \text{ M}^{-1} \text{ s}^{-1}$  [61] or  $1.2 \times 10^7 \text{ M}^{-1} \text{ s}^{-1}$  [62],  $k_{Sulf} = (1.2 \pm 0.2) \times 10^4 \text{ M}^{-1} \text{ s}^{-1}$  [63,64],  
 616  $k_{Cond} = 1.7 \pm 0.3 \text{ s}^{-1}$  [63] or  $0.25 \pm 0.01 \text{ s}^{-1}$  [65], respectively. The latter value for  $k_{Cond}$  was  
 617 determined based on the intrinsic Trp fluorescence method, which reflects the conformational  
 618 changes taking place over the PrxII redox cycle. One limitation of this method is that there is no  
 619 way to unequivocally attribute the observed slow component of the fluorescence variation to  
 620 the condensation step. This attribution is questioned by the observation that the low rate  
 621 constant inferred in ref. [65] leads to overestimation of the susceptibility of Prx2 to sulfinylation  
 622 relative to that observed *in vitro* [66]. For this reason, we adopted the value  $k_{Cond} = 1.7 \text{ s}^{-1}$  [63]  
 623 in the PTTRS model.

624 The rate constant for PrxII-SS reduction by human Trx1-S<sup>-</sup> was determined as  
 625  $k_{Red} = (2.1 \pm 0.3) \times 10^5 \text{ M}^{-1} \text{ s}^{-1}$  [61].

626 For Prx1 the following rate constants were experimentally determined:  
 627  $k_{Ox} = (3.8 \pm 0.15) \times 10^7 \text{ M}^{-1} \text{ s}^{-1}$ ,  $k_{Cond} = 9.0 \pm 0.2 \text{ s}^{-1}$  [67]. The 36-fold higher  $k_{Cond}$  value for PrxI  
 628 than for PrxII is in keeping with the lower sensitivity of the former to hyperoxidation [68,69]. We  
 629 estimated the value of  $k_{Sulf}$  by fitting the following kinetic model

$$\frac{d H_2O_2}{dt} = k_{Ox} Prx-S^- H_2O_2 - k_{Sulf} Prx-SO^- H_2O_2$$

$$\frac{d Prx-S^-}{dt} = k_{Red} Trx-S^- Prx-SS - k_{Ox} Prx-S^- H_2O_2$$

$$\frac{d Prx-SO^-}{dt} = k_{Ox} Prx-S^- H_2O_2 + k_{Srx} Prx-SO_2^- - k_{Sulf} Prx-SO^- H_2O_2 - k_{Cond} Prx-SO^-$$

$$\frac{d Prx-SO_2^-}{dt} = k_{Sulf} Prx-SO^- H_2O_2$$

$$\frac{d Prx-SS}{dt} = k_{Cond} Prx-SO^- - k_{Red} Trx-S^- Prx-SS$$

$$\frac{d NADPH}{dt} = -k_{Red} Trx-S^- Prx-SS$$

631 to several independent NADPH consumption time series from coupled Prx1/Trx/TrxR assays.

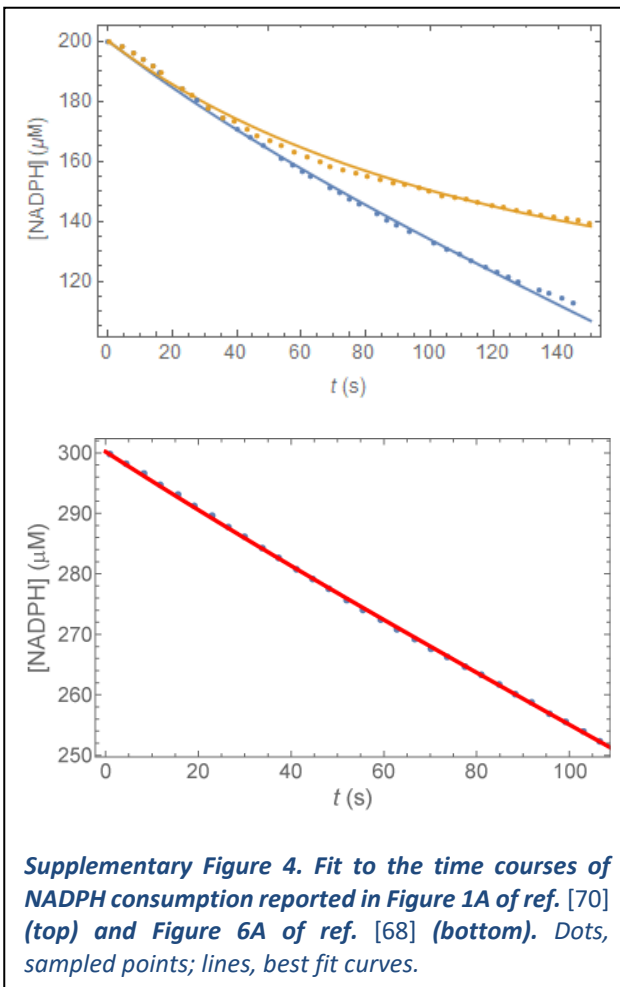

Namely, the first 150 s of the time courses reported in Fig. 1A of ref. [70] for 100  $\mu\text{M}$  and 200  $\mu\text{M}$   $\text{H}_2\text{O}_2$ , after subtracting the basal NADPH consumption rate as computed from the time course for  $[\text{H}_2\text{O}_2]=0$ . And the first 110 s of the time course reported in Figure 6A of ref. [68], after subtracting the basal NADPH consumption rate as computed from the late phase ( $t > 120$  s) of the curve.

The parameters  $k_{Ox}$  and  $k_{Cond}$  were fixed at the values indicated above, whereas  $k_{Sulf}$  and  $k_{Red}$  were left as adjustable parameters. The fits were made using *Mathematica*<sup>TM</sup> v 11 NonlinearModelFit function with default settings.

650 The best fit for the first dataset was obtained for  $k_{Sulf} = (1.61 \pm 0.026) \times 10^3 \text{ M}^{-1}\text{s}^{-1}$ ,

651  $k_{Red} = (1.43 \pm 0.012) \times 10^5 \text{ M}^{-1}\text{s}^{-1}$  (Adjusted  $R^2 = 0.99992$ , Supplementary Figure 4, top), whereas

652 the best fit for the second one was for  $k_{Sulf} = (1.1 \pm 0.11) \times 10^3 \text{ M}^{-1}\text{s}^{-1}$ ,

653  $k_{Red} = (1.11 \pm 0.010) \times 10^5 \text{ M}^{-1}\text{s}^{-1}$  (Adjusted  $R^2 = 0.999999$ , Supplementary Figure 4, bottom).

654 These values for  $k_{Sulf}$  of PrxI are in close agreement, prompting us to adopt the compromise  
 655 value  $k_{Sulf} = 1.3 \times 10^3 \text{ M}^{-1}\text{s}^{-1}$  in subsequent analyses. In turn, this value is one order of  
 656 magnitude lower than that determined for PrxII, which indicates that the lower sensitivity of PrxI  
 657 to hyperoxidation [68,69] is due to both a faster condensation step and less favorable  
 658 sulfinylation. This is in contrast to PrxIII, whose increased sulfinylation sensitivity relative to PrxII  
 659 is entirely due to a lower value of  $k_{Cond}$ , the value of  $k_{Sulf}$  being virtually identical to that for  
 660 PrxII [63].

661 The best-fit values for the  $k_{Red}$  of PrxI determined above are close to each other and comparable  
 662 to that reported for PrxII [61]. For this reason and because we could not determine the origin of  
 663 the Trx used in the experiments in refs. [68,70] we assumed that the value of  $k_{Red}$  for PrxI is the  
 664 same as for PrxII.

665 For simplicity, in the design space analysis we considered a single typical 2-Cys peroxiredoxin  
 666 with  $k_{Ox} = 4. \times 10^7 \text{ M}^{-1}\text{s}^{-1}$ , corresponding to the geometric mean of the values determined for  
 667 PrxI and PrxII and  $k_{Cond}$ ,  $k_{Sulf}$  values that are concentration-weighted averages of the values  
 668 for PrxI and PrxII:

$$669 \quad k_{Cond}^* = f_{PrxI} \times k_{Cond}^{PrxI} + f_{PrxII} \times k_{Cond}^{PrxII} = 0.72 \times 9.0 \text{ s}^{-1} + 0.28 \times 0.65 \text{ s}^{-1} = 6.7 \text{ s}^{-1}$$

$$670 \quad k_{Sulf}^* = f_{PrxI} \times k_{Sulf}^{PrxI} + f_{PrxII} \times k_{Sulf}^{PrxII} = 0.72 \times 1.3 \times 10^3 \text{ M}^{-1}\text{s}^{-1} + 0.28 \times 1.2 \times 10^4 \text{ M}^{-1}\text{s}^{-1} = 4.3 \times 10^3 \text{ M}^{-1}\text{s}^{-1}.$$

671 The value  $k_{Cond}^{PrxII} = 0.65 \text{ s}^{-1}$  is the geometric mean of those determined in refs. [63,65].

### 672 3.2.4. Peroxiredoxin glutathionylation

673 Both PrxI [71] and PrxII [72] can be glutathionylated and Grx1 and/or Srx [71,72] catalyze  
 674 their deglutathionylation. These findings raise the question of the overall importance of these  
 675 processes for the dynamics of the PTTRS, which we discuss below.

676 Peskin *et al.* [72] determined a rate constant  $k_{Glut} = 500 \text{ M}^{-1}\text{s}^{-1}$  for PrxII-SO<sup>-</sup> glutathionylation  
 677 and found that deglutathionylation was fast in presence of Grx1+GSH, such that glutathionylated  
 678 PrxII (PrxII-SSG) could only be detected in erythrocytes from Grx1-knockout mice after a  
 679 peroxide challenge. In turn, although GSH was also able to reduce PrxII-SS, this process is  
 680 relatively slow.[72]

681 The following considerations help evaluating the extent to which Prx-SO<sup>-</sup> de/glutathionylation  
 682 contributes to inhibit hyperoxidation and for Prx's catalytic redox cycle. Once a Prx-SO<sup>-</sup> forms,

683 its fate is determined by a competition between sulfinylation, glutathionylation, and  
 684 condensation. At physiological  $H_2O_2$  and GSH concentrations both glutathionylation and  
 685 condensation are much faster than sulfinylation. But for glutathionylation to strongly inhibit  
 686 sulfinylation it must be faster than condensation, because otherwise it is the latter that will most  
 687 strongly compete with sulfinylation. In erythrocytes, where PrxII is by far the dominant Prx and  
 688 the GSH concentration is  $\approx 3$  mM, the pseudo-first order rate constant for glutathionylation is  
 689  $1.5\text{ s}^{-1}$ . This is comparable to the  $k_{Cond} = 1.7\text{ s}^{-1}$  determined by the same group, and therefore  
 690 in erythrocytes PrxII-SO<sup>-</sup> de/glutathionylation can almost double the overall redox turnover of  
 691 PrxII and inhibit is hyperoxidation by up to  $\approx 50\%$ . (However, GSH may be depleted at the  
 692 oxidative loads where this inhibition might otherwise be most relevant.) Prx-SO<sup>-</sup> reduction by  
 693 GSH is thus relevant in erythrocytes, where PrxII is the dominant Prx.

694 In turn, the following observations indicate that de/glutathionylation plays only a minor role in  
 695 PrxI's redox cycle and protection against hyperoxidation. Park *et al.* [71] determined PrxI-SSG  
 696 de-glutathionylation rates of  $\approx 20\text{ nM s}^{-1}$  with  $22\text{ }\mu\text{M}$  PrxI-SSG and  $1\text{ }\mu\text{M}$  Grx1 or Srx. This Grx1  
 697 and Srx concentration is similar to the cytoplasmic concentrations in the A549 and HeLa cell lines  
 698 used by these authors, from which we can roughly infer a de-glutathionylation pseudo-first order  
 699 rate constant ( $k_{Deglut}$ ) in the order of  $10^{-3}\text{ s}^{-1}$  in these cells. In order to examine the  
 700 consequences of such a  $k_{Deglut}$  consider that the PrxI-SO<sup>-</sup> production rate is  
 701  $v_{PrxI-SS}^+ = k_{Ox} \times PrxI-S^- \times H_2O_2$ . If glutathionylation is the dominant process consuming  
 702 PrxI-SO<sup>-</sup> then the rate of PrxI-SSG production will also approach  $v_{PrxI-SS}^+$ , and the ratio between  
 703 the concentrations of PrxI-SSG and Prx-S<sup>-</sup> at steady state will be approximately:

$$704 \quad \frac{PrxI-SSG}{PrxI-S^-} = \frac{k_{Ox}}{k_{Deglut}} H_2O_2 = \frac{3.8 \times 10^7 \text{ M}^{-1} \text{ s}^{-1}}{10^{-3} \text{ s}^{-1}} H_2O_2 = 3.8 \times 10^{10} \text{ M}^{-1} H_2O_2.$$

705 Therefore, PrxI would be strongly glutathionylated even at  $H_2O_2$  concentrations as low as  
 706 0.1 nM. Similar arguments apply with respect to Prx-SS glutathionylation. However, Park et al  
 707 (2009) needed to use an enrichment approach to detect PrxI-SSG even in cells exposed to  $10\text{ }\mu\text{M}$   
 708  $H_2O_2$ . This shows that glutathionylation/deglutathionylation cannot significantly contribute for  
 709 PrxI's redox turnover or strongly inhibit PrxI sulfinylation. This low contribution may have the  
 710 following two explanations. First, because  $k_{Cond}$  for PrxI-SO<sup>-</sup> is substantially higher than for  
 711 PrxII-SO<sup>-</sup> (Section 3.2.3)  $k_{Glut}$  for PrxI ought to be comparably higher than that for PrxII-SO<sup>-</sup> for  
 712 glutathionylation to have a comparable contribution for the redox turnover of the former Prx.

713 Second, the estimated  $k_{Deglut}$  is at least 100-fold lower than the pseudo-first order rate constant  
 714 for PrxI-SS reduction by a similar (1  $\mu$ M) Trx1-S<sup>-</sup> concentration (>0.1 s<sup>-1</sup> as per Section 3.2.3).  
 715 Moreover, Grx1 and Srx together are over one order of magnitude less abundant in A549 and  
 716 HeLa cells than Trx1 (Supplementary Table 6), and they are also substantially less abundant than  
 717 Trx1 in all other human cell lines examined in the present work.

718 As further evidence for a low contribution of GSH for the Prx redox turnover, even a strong GSH  
 719 depletion failed to increase the fraction of PrxII-SS in HeLa and A549 cells.[74] Because PrxI is  
 720 the main H<sub>2</sub>O<sub>2</sub> reductant in these cells (Supplementary Table 6), if GSH contributed substantially  
 721 its redox turnover its depletion would translate on a significant elevation of the cytoplasmic H<sub>2</sub>O<sub>2</sub>  
 722 concentration, resulting in increased PrxII dimerization.

723 Because in all these cell lines examined in this work PrxI is several-fold more abundant than PrxII,  
 724 the overall contribution of de/glutathionylation for the redox turnover and sulfinylation  
 725 inhibition can be neglected in the coarse-grained single-Prx model.

726 On the other hand, it also follows from the estimates above and from the estimated activities of  
 727 PrxVI and GPx1 (Section 3.2.2 and Supplementary Table 6) that PrxII should be the main driver  
 728 of GSH oxidation in all the examined human cells.

### 729 3.2.5. Sulfiredoxin concentration and activity

730 The reduction of Prx-SO<sub>2</sub><sup>-</sup> to Prx-SO<sup>-</sup> requires ATP and a reductant and is catalyzed by  
 731 sulfiredoxin. The rate-limiting step in this process is the formation of a thiosulfinate intermediate  
 732 [75–78] (Srx-Prx) whose existence for the human enzyme has been confirmed [79]. The

733 resolution of this complex  
 generates an intramolecular  
 disulfide bond Srx-SS, that is  
 then reduced by Trx1-SH in  
 the case of the yeast [80] or  
 presumably GSH in the case  
 of human Srx [81]. Human  
 Srx has a catalytic constant  
 of  $3.0 \times 10^{-3} \text{ s}^{-1}$  for PrxI-SO<sub>2</sub><sup>-</sup>,  
 and  $K_M(\text{ATP}) = 30$   
 $\mu\text{M}$ . [82] Therefore, the  
 enzyme is normally

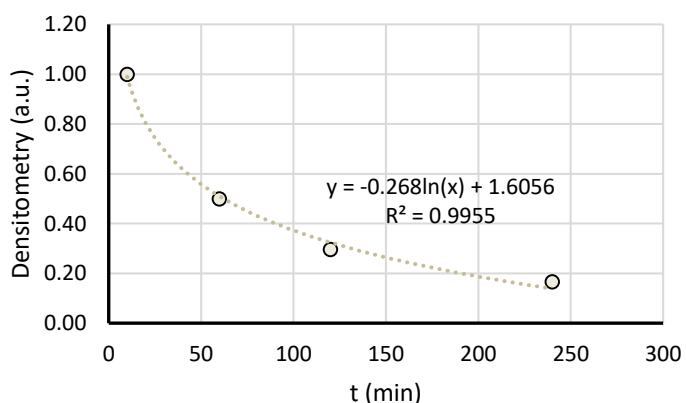

**Supplementary Figure 5. Fit of the time course of PrxI-SO<sub>2</sub><sup>-</sup> reduction in A549 cells previously exposed to 250  $\mu$ M H<sub>2</sub>O<sub>2</sub> from the immunoblot images for “Control RNA”, “ $\alpha$ -PrxSO<sub>2</sub><sup>-</sup>” panel in Figure 8 from ref. [82].**

745 saturated with ATP. The  $K_M(GSH)$  is unknown but presumed to be much lower than  
 746 physiological GSH concentrations. [81] The Michaelis constant for Prx-SO<sub>2</sub><sup>-</sup> also has not been  
 747 characterized, which prevents a detailed modeling of this process' kinetics. On the other hand,  
 748 we were able to estimate a pseudo-first-order rate constant for PrxI-SO<sub>2</sub><sup>-</sup> reduction in A549 cells  
 749 previously exposed to 250 μM H<sub>2</sub>O<sub>2</sub> from the immunoblot images for "Control RNA", "α-PrxSO<sub>2</sub>"  
 750 panel in Figure 8 from ref. [82]. Densitometry analysis of the image reveals a mono-exponential  
 751 decay of the concentration of PrxI-SO<sub>2</sub><sup>-</sup>, which is well fitted (R<sup>2</sup>=0.996) by a  
 752  $k_{Srx}^{A549} = 4.45 \times 10^{-3} \text{ s}^{-1}$  (Supplementary Figure 5). From the data in the Proteomaps database,  
 753 using the method described in Section 3.1, we estimated the concentration of Srx in A549 and  
 754 in Jurkat T cells as:

$$755 \quad Srx(A549) = \frac{\varphi_{Srx}^{A549} C_{tot}}{f_{cytoplasm} \frac{Laa_{Srx}}{Laa}} = \frac{39.76 \times 10^{-6} \times 7.0 \times 10^{-3} (M)}{0.7 \frac{145}{375}} = 1.0 \mu M$$

$$756 \quad Srx(Jurkat) = \frac{1.9 \cdot 10^{-6} \times 7.0 \times 10^{-3} (M)}{0.28 \frac{145}{375}} = 0.13 \mu M.$$

756 Therefore, assuming that the pseudo-first-order rate constant is proportional to the  
 757 concentration of Srx in each cell, we obtained:

$$758 \quad k_{Srx} = \frac{0.13 \mu M}{1.0 \mu M} 4.45 \times 10^{-3} \text{ s}^{-1} = 5.8 \times 10^{-4} \text{ s}^{-1} .$$

759 The slower reduction of Prx-SO<sub>2</sub><sup>-</sup> in HeLa than in A549 cells observed in ref. [83] is consistent  
 760 with the 11-fold lower Srx concentration in those cells as per the proteomic dataset (Section  
 761 3.5).

762 Although PrxII-SO<sub>2</sub><sup>-</sup> is known to be more rapidly reduced than PrxI-SO<sub>2</sub><sup>-</sup> in cells,[84] there is  
 763 insufficient information in the literature to determine  $k_{Srx}$  for the former Prx. However, because  
 764 PrxI is the predominant Prx in all the cell lines the assumption of similar  $k_{Srx}$  for both Prx does  
 765 not strongly affect the results.

### 766 3.2.6. Thioredoxin concentration

767 Trx1 is a predominantly cytoplasmic protein [22] that can also be found in the nucleus  
 768 [29,85]. Assuming a fully cytoplasmic localization, the cytoplasmic concentration of Trx1 (105aa)  
 769 estimated using the method described above is:

$$TrxI = \frac{\varphi_{Trx} C_{tot}^{Jurkat}}{f_{cytoplasm} \frac{Laa_{Trx}}{Laa}} = \frac{4.3 \times 10^{-4} \times 7.0 \times 10^{-3} (M)}{0.3 \frac{105}{375}} = 36. \mu M .$$

771 The quantitative proteomics data for the other *nucleated* human cells considered in this work  
 772 yield cytoplasmic concentrations in the range 17. – 69.  $\mu$ M (Supplementary Table 6). These  
 773 values are in the range of determinations obtained by other methods (Supplementary Table 5),  
 774 including a recent one to determine redox-active Trx1 [86]. The widely held view that Trx1  
 775 concentrations in human cells are in the  $\mu$ M or sub- $\mu$ M range may have been biased by early  
 776 determinations for erythrocytes, which are exceptionally Trx1-poor.

777 However, not all the Trx1 is necessarily available to reduce Prx-SS. Trx1 can covalently bind  
 778 numerous proteins [87], including very abundant actin [88]. Thioredoxin-interacting protein  
 779 (TXNIP), which inhibits Trx1's redox cycling [89], is much less abundant than Trx1 in the  
 780 proteomic datasets under consideration, though. Trx1 also extensively translocates to the  
 781 nucleus under some stress conditions,[85,90] including exposure of cells to extracellular H<sub>2</sub>O<sub>2</sub>  
 782 [91].

783 **Supplementary Table 5: Cytoplasmic thioredoxin concentrations estimated from non-proteomic**  
 784 **methods.** *Cytoplasmic concentrations were estimated from the values provided in the cited references by*  
 785 *assuming that the cytoplasm accounts for 50% of the cell volume (except erythrocytes, 100%), a protein*  
 786 *density of 0.2 g/mL cell volume [15,16] and a cell water content of 70% by volume. Although the methods*  
 787 *used do not discriminate between Trx1 and Trx2, the latter accounts for <6% of the total Trx contents in*  
 788 *cells, according to the quantitative proteomics determinations. Note the very good agreement between*  
 789 *the value for K562 cells in this table and that in Supplementary Table 6.*

| Cell type                          | Concentration<br>( $\mu$ M) | Method                                     | Ref. |
|------------------------------------|-----------------------------|--------------------------------------------|------|
| Peripheral blood mononuclear cells | 86.                         | Fluorescein isothiocyanate-labeled insulin | [86] |
| Lymphocytes                        | 53.                         | Fluorescein isothiocyanate-labeled insulin | [86] |
| Ramos                              | 21.                         | Fluorescein isothiocyanate-labeled insulin | [86] |
| U937                               | $1.1 \times 10^2$           | Fluorescein isothiocyanate-labeled insulin | [86] |
| K562                               | 22.                         | Fluorescein isothiocyanate-labeled insulin | [86] |
| Fibroblasts                        | 18.                         | Immunochemical                             | [92] |
| Erythrocytes                       | 0.56                        | Immunochemical                             | [93] |

790

### 791 3.2.7. Thioredoxin oxidation

792 Besides the reduction of typical 2-Cys peroxiredoxins other processes also contribute  
 793 for Trx1 oxidation. Prominent among these are the reduction of ribonucleotides to  
 794 deoxyribonucleotides catalyzed by ribonucleotide reductase, and the reduction of protein

795 disulfides. The former process is essential for DNA replication. Replication of the  $3.0 \times 10^9$  base  
796 pairs of the human genome during the  $\approx 12$  h duration of S phase in a Jurkat T cell [94] implies  
797 an average Trx1 oxidation rate of  $\approx 2 \mu\text{Ms}^{-1}$ . In turn, an upper estimate of the mean Trx1  
798 oxidation rate imposed by a massive oxidation of the protein thiols can be derived from the  
799 following data. Hansen et al. [43] determined that 3.6 protein thiols (PSH) per 1000 aminoacyl  
800 residues (aa) were oxidized to disulfides upon treatment of HEK293 cells with excess diamide.  
801 Reduction of the protein disulfides was essentially complete 20 minutes after the treatment.  
802 Considering that cells contain  $\approx 5 \times 10^6$  proteins/fL cell water [14], and an average human protein  
803 contains 375 aa, the concentration of protein thiols oxidized to disulfides by this extreme  
804 treatment can be roughly estimated as  $(5 \times 10^6 \text{ proteins}/10^{-15} \text{ L}) \times (375 \text{ aa/protein}) \times (3.6 \text{ PSH}/1000$   
805  $\text{aa}) / (6.0 \times 10^{23} \text{ PSH/mol}) = 11. \text{ mM}$ . Therefore, the mean rate of PSS reduction was  $(11. \text{ mM}/2)$   
806  $/ 1200 \text{ s} = 4.6 \mu\text{M s}^{-1}$ . Values for HeLa cells are in the same range [43]. However, only a small  
807 fraction of the oxidized PSH reside in the cytoplasm [43]. These mean rates are much lower than  
808 the  $V_{\text{Max}}(\text{TrxR}) = 180 \mu\text{Ms}^{-1}$ , estimated in Section 3.2.8. Therefore, they are insufficient to sustain  
809 a strong Trx1 oxidation, although peak rates may be much higher. In turn, the 166  $\mu\text{M}$  Prx if fully  
810 oxidized to Prx-SS can drive Trx1-S<sup>-</sup> oxidation at a maximal rate of  
811  $2.1 \times 10^5 (\text{M}^{-1}\text{s}^{-1}) \times 1.7 \times 10^{-4} (\text{M Prx-SS}) \times 1.2 \times 10^{-5} (\text{M Trx-S}^-) = 0.43 \text{ mM s}^{-1}$ , and can thus in  
812 principle cause the complete Trx1-S<sup>-</sup> oxidation.

### 813 3.2.8. Thioredoxin reductase concentration and activity

814 Low et al. [95] determined the activity of Trx reductase in Jurkat T cells for 5-(3-Carboxy-  
815 4-nitrophenyl)disulfanyl-2-nitrobenzoic acid (DTNB) as substrate as  $1.63 \pm 0.35 \text{ nmol}/10^6$   
816 cells/min, at 37 °C, pH 7.4. We estimated [31] that the activity with human Trx1 as substrate is  
817 1.3-fold higher. Therefore, considering a mean Jurkat T cell volume of  $6.6 \times 10^{-13} \text{ dm}^3$  and a  
818 cytoplasmic fraction of 0.3 [18] one can estimate:

$$819 \quad V_{\text{Max,TrxR}} = 1.3 \frac{1.6 \times 10^{-9} (\text{mol})}{0.3 \times 6.6 \times 10^{-9} (\text{dm}^3) \times 60 (\text{s/min})} = 0.18 \text{ mM s}^{-1} .$$

820 This is the value we will use as reference in our modelling.

821 A partly independent estimate follows from the mass fraction of thioredoxin reductase (TxnRd1,  
822 Laa= 649) ( $\varphi_{\text{TrxR}} = 4.04 \times 10^{-4}$ ) obtained from the proteomic dataset from Geiger *et al.* [12] and  
823 as reported in the Proteomaps database [13]. Applying the method described in Section 3.1,  
824 this corresponds to the following concentration:



$$825 \quad TrxR = \frac{\varphi_{TrxR} \cdot C_{tot}}{f_{cytoplasm} \frac{Laa_{TrxR}}{Laa}} = \frac{4.0 \times 10^{-4} \times 7.0 \times 10^{-3} \text{ (M)}}{0.3 \frac{649}{375}} = 5.3 \mu\text{M}$$

826 Considering the  $k_{cat} = 76.3 \text{ s}^{-1}$  estimated in ref. [31] this concentration yields

827  $V_{Max,TrxR} = 0.45 \text{ mM s}^{-1}$ , in reasonable agreement with the previous estimate.

828 TrxR follows a ping-pong catalytic mechanism [96,97] whose kinetics can be described by:

$$829 \quad v = \frac{V_{Max,TrxR}}{1 + \frac{K_{M,TrxR,NADPH}}{NADPH} + \frac{K_{M,TrxR,TrxSS}}{TrxSS}}$$

830 We considered  $K_{M,TrxR,TrxSS} = 1.8 \mu\text{M}$  [98]. The low  $K_{M,TrxR,NADPH} = 6.0 \mu\text{M}$  [99] implies that

831 except under strong and prolonged oxidative stress NADPH concentrations can be considered

832 saturating. This should be especially true for tumor cell lines, which tend to over-express the

833 pentose phosphates pathway [100] and thus have a large capacity to reduce  $\text{NADP}^+$  to NADPH.

834 Therefore, we assume that TrxR is saturated with NADPH and approximate its kinetics as

$$835 \quad v = \frac{V_{Max,TrxR} TrxSS}{TrxSS + K_{M,TrxR,TrxSS}}.$$

### 836 3.2.9. $\text{NADP}^+$ reduction capacity

837 The oxidative branch of the pentose phosphate pathway (oxPPP) is the main supplier of

838 reducing equivalents for  $\text{NADP}^+$  reduction in the cytoplasm of most cells, with the oxidation of

839 methylene tetrahydrofolate to 10-formyl-tetrahydrofolate sometimes contributing significantly

840 ( $\approx 20\%$ ). [101] The flux over oxPPP is normally limited at the first step, catalyzed by by glucose

841 6-phosphate (G6P) dehydrogenase (G6PD). Ursini *et al.* [102] determined a G6PD activity of 0.23

842  $\mu\text{mol NADPH} / \text{mg protein} / \text{min}$  in untreated proliferating Jurkat T cells, which transiently

843 increased to  $0.51 \mu\text{mol NADPH} / \text{mg protein} / \text{min}$  within 6 h after cells were treated with a 200

844  $\mu\text{M H}_2\text{O}_2$  bolus for 30 min. Similar results were found for HepG2 and Hep3B cells [102].

845 Considering a mean Jurkat T protein contents of  $210 \text{ g dm}^{-3}$  (Section 3.1) and a cytoplasmic

846 fraction of 0.3 [18], and noting that each G6P molecule entering the oxidative branch of the PPP

847 permits the reduction of 2  $\text{NADP}^+$  molecules, one finds the following  $\text{NADP}^+$  reduction capacity

848 of the oxPPP:

$$849 \quad V_{PPP} = 2 \times \frac{2.3 \times 10^{-4} (\text{mol g}^{-1} \text{min}^{-1}) \times 2.1 \times 10^2 (\text{g dm}^{-3})}{0.3 \times 60 \text{ s}} = 5.4 \text{ mM s}^{-1}$$

850 for untreated cells, and  $12. \text{ mM s}^{-1}$  for the treated ones. In turn, from the cytoplasmic G6PD  
851 concentration estimated from the proteomic data in ref. [12] through the method described in  
852 Section 3.1 ( $9.2 \text{ }\mu\text{M}$ ), one can estimate an upper limit for this rate by considering a  $690 \text{ s}^{-1}$   
853 catalytic constant for G6PD [103]. The value obtained,  $13. \text{ mM s}^{-1}$ , is in good agreement with the  
854 rate above.

855 However, the activity of G6PD is in substantial excess of cells' capacity to supply G6P [104].  
856 Indeed, at physiological plasma glucose concentrations, in the absence of oxidative stress, Jurkat  
857 T cells import glucose at a rate of just  $\approx 150 \text{ }\mu\text{M s}^{-1}$ . [105] Under oxidative stress conditions cells  
858 can not only direct most of the G6P through the oxPPP but also recycle intermediates from upper  
859 glycolysis into the oxPPP. [106] Upon this metabolic reconfiguration, the oxPPP could reduce up  
860 to 12  $\text{NADP}^+$  per G6P consumed, yielding a maximum  $\approx 1.8 \text{ mM s}^{-1}$  NADPH production. This is a  
861 theoretical upper limit corresponding to the full oxidation of glucose with a net expenditure of  
862 1 ATP/glucose. As discussed in detail in refs. [104,107], the "excess" G6PD activity is  
863 instrumental in avoiding NADPH depletion and ensuring a fast response to changes in the  
864 demand for reducing equivalents.

865 In turn, actual NADPH consumption rates are much lower than the production capacities  
866 discussed in the previous paragraph. The cytoplasmic consumption of NADPH in proliferating  
867 HEK293T and other cell lines is  $\approx 8 \text{ }\mu\text{M s}^{-1}$ . [101] Most (>80%) of this flux is devoted to  
868 biosynthesis, and in cells that were growth arrested by exposure to a  $150 \text{ }\mu\text{M H}_2\text{O}_2$  bolus the  
869 mean NADPH consumption over 5h actually decreases to  $\approx 5 \text{ }\mu\text{M s}^{-1}$ . [101] (Though substantially  
870 higher instantaneous fluxes may have been attained immediately after treatment.)

871 Altogether, these considerations indicate that cells have the means to avoid sustained strong  
872 NADPH depletion under low to moderate oxidative stress. Indeed, Kuehne *et al.* [106] found that  
873 exposure of fibroblasts to a  $500 \text{ }\mu\text{M H}_2\text{O}_2$  bolus caused just  $\approx 30\%$  NADPH depletion.

### 874 3.3. Estimations for other human cells

875 The concentrations of the relevant proteins in the other cell lines considered in the  
876 work, were computed through the mass fraction method described in Section 3.1, using the data  
877 generated by Geiger *et al.* (2012) [12]. We have also used the dataset from Wiśniewski *et al.* [21]  
878 for human hepatocytes and HepG2 cells.

879 The condensation rate constants for the peroxiredoxin and the pseudo-first order rate constants  
880 for Srx were estimated through the methods described for Jurkat T cells in Sections 3.2.1 and  
881 3.2.4, respectively.

882 The  $V_{Max}$  for TrxR was estimated from the concentration of this enzyme by considering the  
 883 catalytic constant  $k_{cat} = 76.3s^{-1}$  estimated in ref. [31].

884 As discussed in Section 3.2.1, we were able to estimate  $k_{inf}$  for Jurkat T, HeLa, MCF-7 cells and  
 885 erythrocytes but are unaware of data that permit this estimation for any other human cells.  
 886 However, the estimates for these cells suggest that this parameter does not vary widely among  
 887 cell types. Therefore we assume  $k_{inf} = 10. s^{-1}$ , the geometric mean of the values for the four cell  
 888 mentioned above, for all other human cells examined.

889 The sum of the contributions from PrxVI, GPx1, catalase and efflux were used as an  
 890 approximation of the cytoplasm's capacity to scavenge  $H_2O_2$  through processes other than  
 891 reduction by PrxI and PrxII.

892 The contribution from PrxVI activity for all other cell lines was estimated as described in Section  
 893 3.2.2.2 for Jurkat T cells.

894 The GPx1 activities in Jurkat T, HeLa, MCF-7 cells and erythrocytes were obtained from the  
 895 literature (Section 3.2.2.1). For all the other human cells the GPx1 activity was assumed as  
 896 proportional to GPx1 protein mass as given in the Proteomaps database [13] for the dataset  
 897 from ref. [12] or from the dataset in ref. [21] and the same proportionality constant as for Jurkat  
 898 T cells. Therefore, drawing on the estimate in Section 3.2.2.1, and further assuming that the  
 899 total protein concentration is essentially invariant among cell types (*i.e.*,  $C_{tot}^{Cell\ type} = C_{tot}^{Jurkat}$ ), the  
 900 estimated value is given by:

$$901 \quad k_{GPx}^{Cell\ type} = \frac{k_{GPx}^{Jurkat}}{\varphi_{GPx}^{Jurkat}} \varphi_{GPx}^{Cell\ type} = \frac{4.1\ s^{-1}}{32.17\ ppm} \varphi_{GPx}^{Cell\ type}\ s^{-1} \quad (42)$$

902 In all cell lines examined catalase is confined to peroxisomes. As a consequence, its action on  
 903 cytoplasmic  $H_2O_2$  is limited by the membrane permeation step. The peroxisomal-membrane-  
 904 limited Cat activities in Jurkat T, HeLa, MCF-7 cells and erythrocytes were obtained from the  
 905 literature (Section 3.2.2.4). For simplicity we assumed that all other cell lines show the same  
 906 proportionality between catalase abundance and effective pseudo-first-order rate constant for  
 907 consumption of cytoplasmic  $H_2O_2$  as Jurkat T cells. Therefore, drawing on the estimate in Section  
 908 3.2.2.4, and further assuming that the total protein concentration is essentially invariant among  
 909 cell types (*i.e.*,  $C_{tot}^{Cell\ type} = C_{tot}^{Jurkat}$ ), the estimated value is given by:

910 
$$k_{Cat}^{Cell\ type} = \frac{\varphi_{Cat}^{Cell\ type}}{\varphi_{Cat}^{Jurkat}} k_{Cat}^{Jurkat} = \frac{0.4\ s^{-1}}{246.98\ ppm} \varphi_{Cat}^{Cell\ type}\ s^{-1}. \quad (43)$$

911 Although this is admittedly a rough estimate of  $k_{Cat}^{Cell\ type}$ , its uncertainty is a minor concern  
 912 because  $k_{Cat}^{Cell\ type}$  typically has a minor contribution to  $k_{Alt}$ .

### 913 3.4. Estimations for *Saccharomyces cerevisiae*

#### 914 3.4.1. H<sub>2</sub>O<sub>2</sub> Permeability

915 The permeability constant and pseudo-first order rate constant for permeation to/from  
 916 the cytoplasm were estimated from data in figure 1 of ref. [108], which shows the time course  
 917 of H<sub>2</sub>O<sub>2</sub> consumption by a yeast liquid culture with OD 0.5 (7x10<sup>6</sup> cells/ml). By fitting an  
 918 exponential decay to this data (Supplementary Figure 6) we first find the pseudo-first order rate  
 919 constant for the consumption of extracellular H<sub>2</sub>O<sub>2</sub>:  $k_{cells} = (1.33 \pm 0.08) \times 10^{-3}\ s^{-1}$ . From this  
 920 value and considering the average cell surface area for yeast as 133±9.5 μm<sup>2</sup> [109] we then  
 921 obtain the permeability coefficient:

922 
$$k_{perm} = \frac{1.33 \times 10^{-3}\ (s^{-1})}{7 \times 10^9\ (cells\ dm^{-3}) \times 1.33 \times 10^{-8}\ (dm^2)} = 1.43 \times 10^{-5}\ dm\ s^{-1}$$

923 Considering that the water volume fraction of *S. cerevisiae* cells is  $f_{water} = 0.68$  [110], that the  
 924 cell volume is 42 μm<sup>3</sup> [111] and that the volume ratio of cytoplasm to full cell is  $f_{cytoplasm} = 0.70$   
 925 [112], we obtain the cytoplasmic water volume:

926 
$$V_{cytoplasm} = f_{cytoplasm} f_{water} V_{yeast\ cell} = 0.70 \times 0.68 \times 4.2 \times 10^{-14}\ dm^3 = 2.0 \times 10^{-14}\ dm^3.$$

927 From this we finally obtain the following pseudo-first order rate constant for permeation:

928 
$$k_{inf} = \frac{1.43 \times 10^{-5}\ (dms^{-1}) \times 1.33 \times 10^{-8}\ (dm^2)}{2.0 \times 10^{-14}\ (dm^3)} = 9.5\ s^{-1},$$

929 which is similar to that for human cells.

#### 930 3.4.2. Alternative H<sub>2</sub>O<sub>2</sub> sinks

931 The cytoplasm of *S. cerevisiae* contains catalase T (CTT1) and alkyl hydroperoxide  
 932 reductase (Ahp1), an atypical 2-Cys peroxiredoxin. Furthermore, cytochrome c peroxidase (CcP)  
 933 in the mitochondrial intermembrane space may also contribute to clear cytoplasmic H<sub>2</sub>O<sub>2</sub>, as the  
 934 latter is expected to freely cross the mitochondrial outer membrane. The contributions of these  
 935 enzymes for cytoplasmic H<sub>2</sub>O<sub>2</sub> clearance were estimated as follows.

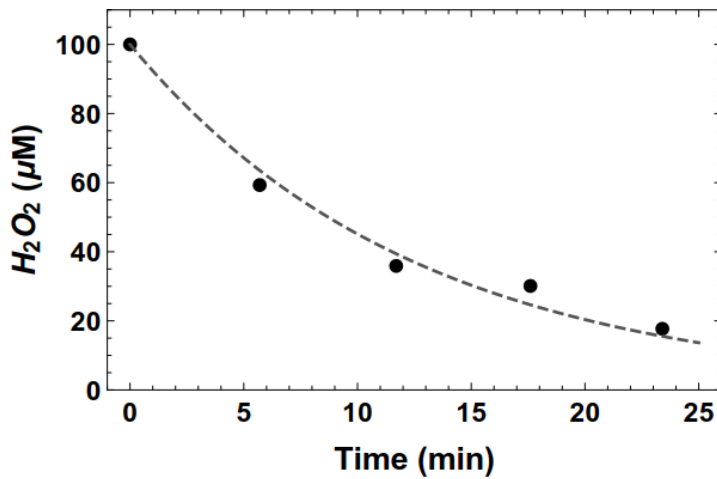

Supplementary Figure 6. Fit of the time course of H<sub>2</sub>O<sub>2</sub> consumption in *S. cerevisiae* cells culture exposed to a 100 µM H<sub>2</sub>O<sub>2</sub> bolus. Black dots, experimental data; broken line, best fit to the function  $H_2O_2 = 100 \exp(-k_{consumption} t)$ . Best fit parameter was  $k_{consumption} = (1.33 \pm 0.08) \times 10^{-3} s^{-1}$ . The fitting was done using the function `NonLinearModelFit` in `Mathematica 10.3`.

### 3.4.2.1. Cytochrome c peroxidase

From the molecule counts per cell in ref. [113], and assuming that H<sub>2</sub>O<sub>2</sub> can freely permeate between cytosol and the mitochondrial intermembrane space and that the volume of the latter compartment is negligible, the estimated concentration of CcP is:

$$948 \quad CcP = \frac{\frac{N_{CcP}}{N_A}}{V_{cytoplasm}} = \frac{\frac{6725 \text{ molecule}}{6.02 \times 10^{23} \text{ molecule mol}^{-1}}}{2.0 \times 10^{-14} \text{ dm}^3} = 0.54 \mu\text{M}$$

949 Considering the rate constant for H<sub>2</sub>O<sub>2</sub> reduction by CcP ( $3.9 \times 10^7 \text{ M}^{-1} \text{ s}^{-1}$  [114]) one obtains:

$$950 \quad k_{CcP} = 0.54 \times 10^{-6} (\text{M}) \times 3.9 \times 10^7 (\text{M}^{-1} \text{ s}^{-1}) = 21. \text{ s}^{-1} .$$

### 951 3.4.2.2. Catalase T

952 Branco *et al.* [108] determined a  $A_{Cat} = 1.1 \times 10^{-2} \text{ dm}^3 \text{ g}^{-1} \text{ s}^{-1}$  catalase activity in extracts  
 953 from yeast growing in exponential phase, which is abolished in *ctt1Δ* mutants. Considering  
 954  $m_{prot} = 5.7 \text{ pg}$  as the protein content of a yeast cell [115], this activity translates into:

$$955 \quad k_{CTT1} = \frac{A_{cat} m_{prot}}{V_{cytoplasm}} = \frac{1.1 \times 10^{-2} (\text{dm}^3 \text{ g}^{-1} \text{ s}^{-1}) \times 5.7 \times 10^{-12} (\text{g})}{2.0 \times 10^{-14} (\text{dm}^3)} = 3.1 \text{ s}^{-1} .$$

### 956 3.4.2.3. Alkyl hydroperoxide reductase

957 From the molecule counts per cell in ref. [113] the estimated concentration of Ahp1 is:

$$958 \quad Ahp1 = \frac{\frac{N_{Ahp1}}{N_A}}{V_{cytoplasm}} = \frac{\frac{16228 \text{ molecule}}{6.02 \times 10^{23} \text{ molecule mol}^{-1}}}{2.0 \times 10^{-14} \text{ dm}^3} = 1.3 \mu\text{M}$$

959 The second-order rate constant for H<sub>2</sub>O<sub>2</sub> reduction by Ahp1 can be estimated from the specific  
 960 activity (3.3×10<sup>-4</sup> mol g<sup>-1</sup> s<sup>-1</sup>) and Michaelis constant (1.5×10<sup>-4</sup> M) determined in ref. [116],  
 961 considering a molecular mass of 1.9×10<sup>4</sup> g mol<sup>-1</sup> (<http://www.uniprot.org/>)[22]:

$$962 \quad k_{Ahp1}^* = \frac{3.3 \times 10^{-4} (\text{mol g}^{-1} \text{ s}^{-1}) \times 1.9 \times 10^4 (\text{g mol}^{-1})}{1.5 \times 10^{-4} (\text{M})} = 4.2 \times 10^4 \text{ M}^{-1} \text{ s}^{-1} .$$

963 From this one obtains the following pseudo-first order rate constant:

$$964 \quad k_{Ahp1} = 1.3 \times 10^{-6} (\text{M}) \times 4.2 \times 10^4 (\text{M}^{-1} \text{ s}^{-1}) = 0.054 \text{ s}^{-1} ,$$

965 which is negligible in comparison to other H<sub>2</sub>O<sub>2</sub> sinks.

966

967 Altogether, the H<sub>2</sub>O<sub>2</sub> clearance capacity through processes other than reduction by the typical  
 968 2-Cys peroxiredoxins and including the efflux through the plasma membrane adds up to:

$$969 \quad k_{Alt} = (21. + 3.1 + 9.5) \text{ s}^{-1} = 34. \text{ s}^{-1}$$

### 970 3.4.3. Peroxiredoxin concentrations and rate constants

971 *S. cerevisiae* contains two cytoplasmic typical 2-Cys peroxiredoxins, Tsa1 and Tsa2. Their  
 972 cytoplasmic concentrations can be estimated from the protein counts in ref. [113] as:

$$973 \quad Tsa1 = \frac{\frac{N_{Tsa1}}{N_A}}{V_{cytoplasm}} = \frac{\frac{378212 \text{ molecule}}{6.02 \times 10^{23} \text{ molecule mol}^{-1}}}{2.0 \times 10^{-14} \text{ dm}^3} = 31. \mu\text{M} ,$$

$$974 \quad Tsa2 = \frac{\frac{N_{Tsa2}}{N_A}}{V_{cytoplasm}} = \frac{\frac{4820 \text{ molecule}}{6.02 \times 10^{23} \text{ molecule mol}^{-1}}}{2.0 \times 10^{-14} \text{ dm}^3} = 0.40 \mu\text{M} .$$

975 The rate constants for H<sub>2</sub>O<sub>2</sub> reduction by these Prx have been determined by Tairum *et al.* [117]  
 976 as (4.7±2.2)×10<sup>7</sup> M<sup>-1</sup>s<sup>-1</sup> and (5.0±1.7)×10<sup>6</sup> M<sup>-1</sup>s<sup>-1</sup>, respectively. (For comparison, previous  
 977 determinations [118] yielded 2.2×10<sup>7</sup> M<sup>-1</sup>s<sup>-1</sup> and 1.3×10<sup>7</sup> M<sup>-1</sup>s<sup>-1</sup>, respectively.) Because Tsa1 is  
 978 much more abundant than Tsa2 it is a good approximation to consider  $Prx_T = 31. \mu\text{M}$ ,

$$979 \quad k_{Ox} = 4.7 \times 10^7 \text{ M}^{-1} \text{ s}^{-1} .$$

980 The rate constants for the condensation reaction and for Prx-SS reduction by Trx1 were  
 981 estimated through a global fit of the following model (44) to the NADPH oxidation progress  
 982 curves reported in ref. [119]:

$$\frac{d Tsa1-S^-}{dt} = k_{Red} \times Tsa1-SS \times Trx1-S^- - k_{Ox} \times Tsa1-S^- \times H_2O_2$$

$$\frac{d Tsa1-SO^-}{dt} = k_{Ox} \times Tsa1-S^- \times H_2O_2 - k_{Cond} \times Tsa1-SO^- - k_{Sulf} \times Tsa1-SO^- \times H_2O_2$$

$$\frac{d Tsa1-SS}{dt} = k_{Cond} \times Tsa1-SO^- - k_{Red} \times Tsa1-SS \times Trx1-S^-$$

$$983 \quad \frac{d Trx1-S^-}{dt} = k_{Trr1} \times Trx1-SS - k_{Red} \times Tsa1-SS \times Trx1-S^- \quad (44)$$

$$\frac{d NADPH}{dt} = -k_{Trr1} \times Trx1-SS$$

$$Tsa1_T = Tsa1-SS + Tsa1-S^- + Tsa1-SO^- + Tsa1-SO_2^-$$

$$Trx1_T = Trx1-SS + Trx1-S^-$$

984 In order to make all the relevant parameters identifiable and facilitate the global fitting we  
985 rescaled all the variables as follows:

$$986 \quad x = \frac{Tsa1-S^-}{Tsa1_T}, y = \frac{Tsa1-SO^-}{Tsa1_T}, z = \frac{Tsa1-SS}{Tsa1_T}, w = \frac{Tsa1-SO_2^-}{Tsa1_T},$$

$$r = \frac{Trx1-S^-}{Trx1_T}, s = \frac{Trx1-SS}{Trx1_T}, n = \frac{NADPH}{Trx1_T},$$

$$\tau = t \times k_{Trr1}, \mu = \frac{Tsa1_T}{Trx1_T}, \delta = \frac{k_{Cond} \times Tsa1_T}{Trx1_T},$$

$$\psi = \frac{k_{Cond}}{k_{Trr1}}, \rho = \frac{k_{Red} \times Tsa1_T}{k_{Trr1}}, \alpha = \frac{k_{Ox} \times Tsa1_T^2}{k_{Trr1}}, \xi = \frac{k_{Sulf} \times Tsa1_T}{k_{Trr1}}.$$

987 We fixed the value of  $k_{Trr1} = 3.4 \times 10^7 \text{ (M}^{-1}\text{s}^{-1}) \times 2.0 \times 10^{-7} \text{ (M)} = 6.8 \text{ s}^{-1}$  based on the

988  $k_{cat} / K_M = 3.4 \times 10^7 \text{ M}^{-1}\text{s}^{-1}$  value determined in ref. [120], and we used the NonlinearModelFit

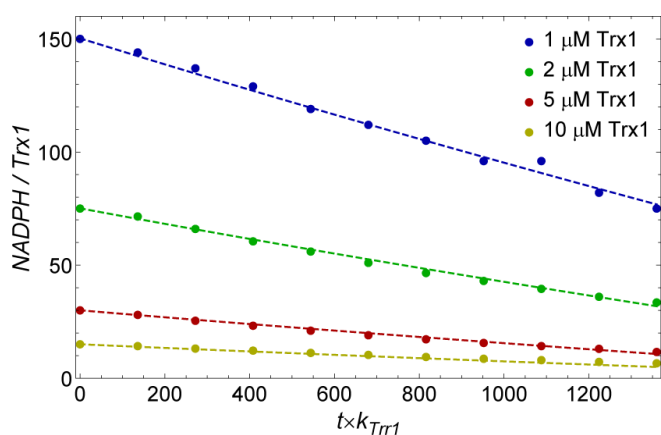

**Supplementary Figure 7. Global fit (broken lines) of the NADPH progress curves reported in ref. [119] (dots) for reaction mixtures containing 150  $\mu\text{M}$  NADPH, 200  $\mu\text{M}$   $\text{H}_2\text{O}_2$ , 1  $\mu\text{M}$  Tsa1, 0.2  $\mu\text{M}$  Trr1, and 1  $\mu\text{M}$ , 2  $\mu\text{M}$ , 5  $\mu\text{M}$  and 10  $\mu\text{M}$  Trx1. Fitted values are  $\rho = 0.195 \pm 0.015$ ,  $\psi = 0.0854 \pm 0.0045$ ,  $\xi = (9. \pm 5.0) \times 10^{-7}$  ( $R^2 = 0.9996$ ).**

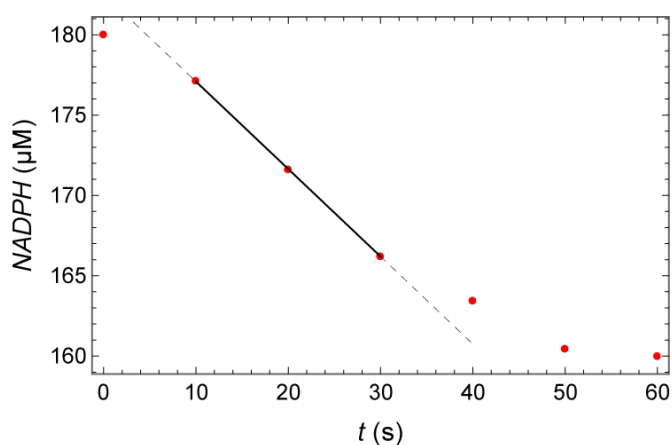

**Supplementary Figure 8. Determination of the rate of NADPH consumption in the experiment reported in in Figure 6A from ref. [121]. The reaction mixture contained 0.225  $\mu\text{M}$  Trx2, 0.075  $\mu\text{M}$  thioredoxin reductase 2, 2.1  $\mu\text{M}$  Tsa1, 0.18 mM NADPH, 20  $\mu\text{M}$   $\text{H}_2\text{O}_2$ , 1 mM azide, 100  $\mu\text{M}$  DTPA, 50 mM Hepes.NaOH, pH 7.4. The black line was fitted to the 10 s – 20 s data points, yielding a slope  $5.4 \times 10^{-7} \text{ M s}^{-1}$ .**

function of *Mathematica*<sup>TM</sup> 10.3 with default settings to fit the scaled model to the data, with  $\rho, \psi$  as adjustable parameters. This procedure achieved an excellent fit (Supplementary Figure 7). Solving the scaling for the original parameters yields

$$k_{Cond} = 0.58 \pm 0.046 \text{ s}^{-1},$$

$$k_{Red} = (1.33 \pm 0.071) \times 10^6 \text{ M}^{-1} \text{ s}^{-1},$$

$$k_{Sulf} = 7. \pm 3.4 \text{ M}^{-1} \text{ s}^{-1}.$$

Of note, this value for  $k_{Sulf}$  is much lower than that estimated for the human typical 2-Cys peroxiredoxins [63], consistent with the low hyperoxidation shown in the experiments in ref. [119] for Tsa1 treatment with 200  $\mu\text{M}$   $\text{H}_2\text{O}_2$ .

The value of  $k_{Red}$  for the reduction of Tsa1 by Trx2 was roughly estimated from the rate of NADPH oxidation reported in Figure 6A from ref. [121] (Supplementary Figure 8). In order

1014 to approximate the concentration of NADPH we assumed that the decrease in absorbance at  
 1015 340 nm over the course of the experiment corresponded to the consumption of 20  $\mu\text{M}$  NADPH,  
 1016 the  $\text{H}_2\text{O}_2$  concentration initially present in the reaction medium. With this approximation, the  
 1017 time course showed a decrease in NADPH concentration at a constant rate of  $0.54 \mu\text{M s}^{-1}$  from  
 1018 10 s to 30 s, from which a  $k_{Red} = 1.2 \times 10^6 \text{ M}^{-1} \text{ s}^{-1}$  can be estimated. This value is within the  
 1019 experimental error of the value estimated above for Tsa1 reduction by Trx1 and of the same  
 1020 order of magnitude of that ( $6.4 \times 10^6 \text{ M}^{-1} \text{ s}^{-1}$ ) determined for the reduction of Ahp1 by Trx2 [122].



1021 The value of  $k_{Red}$  to be considered in the model is a concentration-weighted average of the  
 1022 values for Trx1 and Trx2:

$$1023 \quad k_{Red} = 0.33 \times 1.33 \times 10^6 \text{ M}^{-1} \text{ s}^{-1} + 0.67 \times 1.2 \times 10^6 \text{ M}^{-1} \text{ s}^{-1} = 1.2 \times 10^6 \text{ M}^{-1} \text{ s}^{-1},$$

1024 where 0.33 and 0.67 are the fractions of Trx contributed by Trx1 and Trx2, respectively (Section  
 1025 3.4.5). In lack of specific data we assume that the sulfinylation rate constant for Tsa2 is similar  
 1026 to that for Tsa1. This assumption is of minor consequence, given the low concentration of Tsa2.

### 1027 3.4.4. Sulfiredoxin concentration and activity

1028 The cytoplasmic concentration of Srx was estimated from spectral count in ref. [113],  
 1029 under the assumptions that concentration is the same in the cytoplasm and in the nucleus and  
 1030 that the nucleus constitutes 9% of the cell volume [112]:

$$1031 \quad Srx = \frac{N_{Srx}}{N_A} = \frac{538 \text{ molecule}}{6.02 \times 10^{23} \text{ molecule mol}^{-1}} = 0.039 \text{ } \mu\text{M}.$$

$$V_{cytoplasm} + V_{nucleus} = (20. + 2.6) \times 10^{-15} \text{ dm}^3$$

1032 The catalytic constant for yeast Srx is  $(3.0 \pm 0.1) \times 10^{-2} \text{ s}^{-1}$  [78] and a  $K_M(\text{Tsa1-SO}_2^-) = 20 \text{ } \mu\text{M}$  can be  
 1033 inferred from data in ref. [76]. Thus, except when a large fraction of Tsa1 is sulfinylated the  
 1034 reduction of  $\text{Tsa1-SO}_2^-$  follows approximately pseudo-first order kinetics with a rate constant

$$1035 \quad k_{Srx} = \frac{3.0 \times 10^{-2} \text{ (s}^{-1})}{2.0 \times 10^{-5} \text{ (M)}} 3.9 \times 10^{-8} \text{ (M)} = 5.9 \times 10^{-5} \text{ s}^{-1}.$$

1036 At  $\text{Tsa1-SO}_2^-$  concentrations substantially above  $20 \text{ } \mu\text{M}$  the reduction rate will eventually  
 1037 saturate at  $3.0 \times 10^{-2} \text{ (s}^{-1}) \times 3.9 \times 10^{-8} \text{ (M)} = 1.2 \text{ nM s}^{-1}$ . Because these high  
 1038  $\text{Tsa1-SO}_2^-$  concentrations, corresponding to >65% hyperoxidation, should only be attained at  
 1039 very high  $v_{sup}$ , we neglect Srx saturation.

### 1040 3.4.5. Thioredoxin concentration

1041 *S. cerevisiae* has two thioredoxin isoforms that are functionally redundant to a large  
 1042 extent and are present in most organelles: Trx1 and Trx2. We considered the two isoform as a  
 1043 single thioredoxin. From the protein count in ref. [113] we can estimate their aggregate  
 1044 concentration as:

$$1045 \quad Trx_T = \frac{N_{Trx1} + N_{Trx2}}{N_A} = \frac{(8579 + 17237) \text{ molecule}}{6.02 \times 10^{23} \text{ molecule mol}^{-1}} = 1.5 \text{ } \mu\text{M}$$

$$f_{water} V_{yeast} = 0.68 \times 4.2 \times 10^{-14} \text{ dm}^3$$

1046 3.4.6. Thioredoxin reductase concentration and activity

1047 From the spectral count in ref. [113] we can estimate the concentration of TrxR1 as  
1048 follows, neglecting its contents in the mitochondrial intermembrane space:

$$1049 \quad TrxR = \frac{N_{TrxR}}{N_A} = \frac{292122 \text{ molecule}}{6.02 \times 10^{23} \text{ molecule mol}^{-1}} = 24. \mu\text{M}$$

$V_{cytoplasm} = 2.0 \times 10^{-14} \text{ dm}^3$

1050 *S. cerevisiae* TrxR has similar  $k_{cat} = 43. \text{s}^{-1}$  for both Trx1 and Trx2,[120] which translates into

$$1051 \quad V_{Max} = k_{cat} \times TrxR = 43. (\text{s}^{-1}) \times 2.4 \times 10^{-5} (\text{M}) = 1.0 \text{ mM s}^{-1}.$$

1052 The  $K_M$  for these two substrates are also quite similar (1.3  $\mu\text{M}$  and 0.6  $\mu\text{M}$ , respectively  
1053 [120]) yielding a weighted average

$$1054 \quad K_M = \frac{8579 \times 1.3 (\mu\text{M}) + 17237 \times 0.6 (\mu\text{M})}{8579 + 17237} = 0.8 \mu\text{M}.$$

1055 3.5. Summary of protein concentrations and kinetic parameters

1056 **Supplementary Table 6. Summary of the protein concentrations and kinetic parameters estimated in this work.** The values  
 1057 of the concentrations and parameters entering the kinetic model are presented in Table 2 of the main text. *Italicized values*  
 1058 were determined specifically for the cells in point.

|                          | PrxI                | PrxII               | PrxVI | GPx1                | Cat              | Srx                | Grx1  | Trx1             | TrxR1 | k <sub>Cat</sub> | k <sub>PrxVI</sub>  | k <sub>GPx1</sub> | k <sub>Inf</sub> |
|--------------------------|---------------------|---------------------|-------|---------------------|------------------|--------------------|-------|------------------|-------|------------------|---------------------|-------------------|------------------|
| Localization:            | C                   | C                   | C     | C/M                 | P <sup>a</sup>   | C                  | C     | C                | C     | -                | -                   | -                 | -                |
| Units:                   | μM                  | μM                  | μM    | μM                  | μM               | μM                 | μM    | μM               | μM    | s <sup>-1</sup>  | s <sup>-1</sup>     | s <sup>-1</sup>   | s <sup>-1</sup>  |
| A549                     | 47.                 | 2.0                 | 11.   | 0.27                | 1.4              | 1.0                | 1.9   | 29.              | 7.7   | 0.13             | 33.                 | 0.96              | 10.              |
| GAMG                     | 71.                 | 5.4                 | 14.   | 3.6                 | 3.2              | 0.57               | 1.2   | 44.              | 7.6   | 0.32             | 42.                 | 13.               | 10.              |
| HEK293                   | 1.1×10 <sup>2</sup> | 32.                 | 45.   | 4.6                 | 1.1              | 0.092              | 0.33  | 46.              | 2.5   | 0.11             | 1.3×10 <sup>2</sup> | 16.               | 10.              |
| HeLa                     | 51.                 | 15.                 | 27.   | 0.98                | 1.9              | 0.24               | 0.41  | 24.              | 3.1   | 3.0              | 80.                 | 73.               | 12.              |
| HepG2                    | 69.                 | 24.                 | 36.   | 2.1                 | 4.5              | 0.57               | 4.9   | 27.              | 1.5   | 0.44             | 1.1×10 <sup>2</sup> | 7.1               | 10.              |
| Jurkat T                 | 1.2×10 <sup>2</sup> | 46.                 | 25.   | 1.2                 | 4.1              | 0.12               | 9.4   | 36.              | 5.5   | 0.40             | 75.                 | 4.1               | 5.2              |
| K562                     | 72.                 | 29.                 | 55.   | 0.1                 | 3.9              | 0.077              | 0.026 | 28.              | 1.8   | 0.38             | 1.6×10 <sup>2</sup> | 0.35              | 10.              |
| LnCap                    | 50.                 | 36.                 | 33.   | 5.6                 | 9.8              | 0.21               | 0.23  | 17.              | 4.1   | 0.96             | 1.0×10 <sup>2</sup> | 19.               | 10.              |
| MCF-7                    | 59.                 | 33.                 | 17.   | 3.5                 | 1.9              | 0.74               | 0.17  | 23.              | 3.0   | 7.0              | 51.                 | 6.8               | 14.              |
| RKO                      | 59.                 | 28.                 | 43.   | 1.1                 | 0.89             | 1.5                | 15.   | 69.              | 3.6   | 0.086            | 1.3×10 <sup>2</sup> | 3.7               | 10.              |
| U-2 OS                   | 73.                 | 11.                 | 27.   | 1.5                 | 1.6              | 0.55               | 2.9   | 18.              | 4.4   | 0.16             | 82.                 | 5.2               | 10.              |
| HepG2 <sup>b</sup>       | 86.                 | 24.                 | 21.   | 0.049               | 7.8              | 0.34               | 2.9   | 24.              | 0.62  | 0.76             | 63.                 | 0.17              | 10.              |
| Hepatocytes <sup>b</sup> | 67.                 | 19.                 | 61.   | 2.4                 | 43.              | 0.065              | 4.7   | 63.              | 0.65  | 4.2              | 1.8×10 <sup>2</sup> | 8.3               | 10.              |
| Erythrocytes             | 6.8                 | 5.7×10 <sup>2</sup> | 3.0   | 1.3×10 <sup>2</sup> | 24. <sup>c</sup> | -                  | -     | 0.56             | 0.13  | 218.             | 9.0                 | 25.               | 11.              |
| Yeast                    | 31. <sup>d</sup>    | 0.40 <sup>e</sup>   | -     | 0.54 <sup>f</sup>   | -                | 0.039 <sup>g</sup> | -     | 1.5 <sup>h</sup> | 24.   | 3.1              | -                   | 21.               | 9.5              |

1059 Subcellular localization is reported as: N, nuclear; C, cytoplasmic; M, mitochondrial; P, peroxisome.

1060 <sup>a</sup> Concentration referred to cell water volume. <sup>b</sup> From the dataset in ref. [21]. <sup>c</sup> In erythrocytes catalase is localized in the cytoplasm.

1061 <sup>d</sup> Tsa1. <sup>e</sup> Tsa2. <sup>f</sup> Ccp<sup>g</sup> Also localized to the nucleus. <sup>h</sup> Present in most organelles.

#### 1062 4. Numerical model considering PrxI and PrxII separately

1063 In order to evaluate the redox state of PrxI and PrxII separately in simulations of wet-lab  
 1064 experiments we set up the model below, which treats these Prx as separate entities and  
 1065 accounts for H<sub>2</sub>O<sub>2</sub> permeation.

$$\frac{d H_2O_{2,out}}{dt} = \frac{\kappa n_{cells} S}{V_{medium}} (H_2O_2 - H_2O_{2,out})$$

$$\frac{d H_2O_2}{dt} = \frac{\kappa S}{V_{cytoplasm}} (H_2O_{2,out} - H_2O_2) - k_{Alt} H_2O_2 - k_{Ox} (PrxI-S^- + PrxII-S^-) H_2O_2 -$$

$$- k'_{Sulf} PrxI-SO^- H_2O_2 - k''_{Sulf} PrxII-SO^- H_2O_2$$

$$\frac{d PrxI-SO^-}{dt} = k_{Ox} PrxI-S^- H_2O_2 + k_{Srx} PrxI-SO_2^- - k'_{Sulf} PrxI-SO^- H_2O_2 - k'_{Cond} PrxI-SO^-$$

$$\frac{d PrxI-SO_2^-}{dt} = k'_{Sulf} PrxI-SO^- H_2O_2 - k_{Srx} PrxI-SO_2^-$$

$$\frac{d PrxI-SS}{dt} = k'_{Cond} PrxI-SO^- - k_{Red} Trx-S^- PrxI-SS$$

$$\frac{d PrxII-SO^-}{dt} = k_{Ox} PrxII-S^- H_2O_2 + k_{Srx} PrxII-SO_2^- - k''_{Sulf} PrxII-SO^- H_2O_2 - k''_{Cond} PrxII-SO^-$$

$$\frac{d PrxII-SO_2^-}{dt} = k''_{Sulf} PrxII-SO^- H_2O_2 - k_{Srx} PrxII-SO_2^-$$

$$\frac{d PrxII-SS}{dt} = k''_{Cond} PrxII-SO^- - k_{Red} Trx-S^- PrxII-SS$$

$$\frac{d Trx-SS}{dt} = k_{Red} Trx-S^- (PrxI-SS + PrxII-SS) - \frac{V_{App} Trx-SS}{K_M + Trx-SS}$$

1066  $PrxI_T = PrxI-S^- + PrxI-SS + PrxI-SO^- + PrxI-SO_2^-$

$$PrxII_T = PrxII-S^- + PrxII-SS + PrxII-SO^- + PrxII-SO_2^-$$

$$Trx_T = Trx-S^- + Trx-SS$$

1067 Here,  $H_2O_{2,out}$  stands for the concentration of H<sub>2</sub>O<sub>2</sub> in the medium,  $\kappa$  stands for the  
 1068 permeability constant of the cell membrane,  $n_{cells}$  stands for the number of cells in the medium  
 1069 volume ( $V_{medium}$ ) considered, and  $k'_{Cond}$ ,  $k''_{Cond}$  ( $k'_{Sulf}$ ,  $k''_{Sulf}$ ) represent the condensation  
 1070 (sulfinylation) rate constants for PrxI-SO<sup>-</sup> and PrxII-SO<sup>-</sup>, respectively.

1071 **5. Simulation of experimental results**

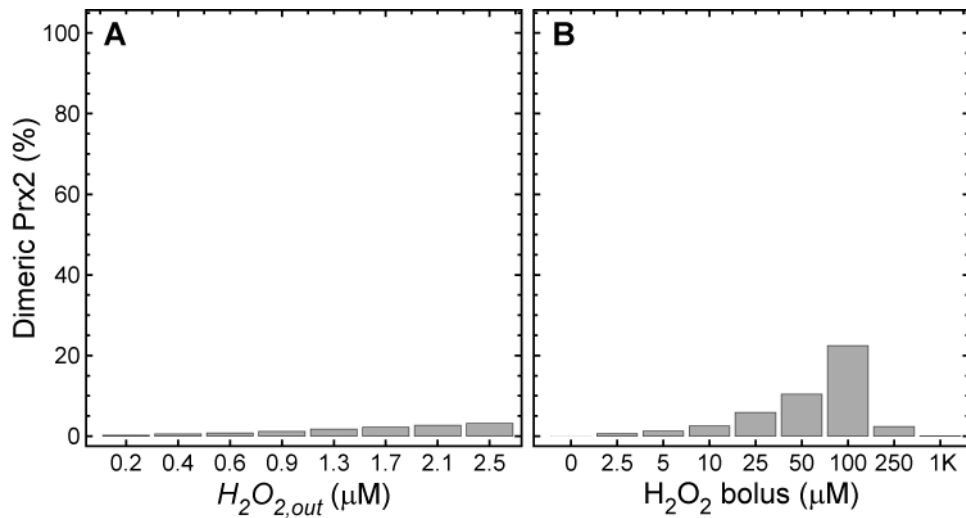

1072 **Supplementary Figure 9. Simulation of experiments treating HEK293 cells with H<sub>2</sub>O<sub>2</sub> steady states (A)**  
1073 **and boluses (B).** Plots show the percentage of disulfide-crosslinked PrxII dimers at various steady  
1074 extracellular H<sub>2</sub>O<sub>2</sub> concentrations (A), or 5 min after bolus treatment (B) under the conditions of the  
1075 experiments described in Figures 6A and 6B (respectively) from Sobotta et al. [33]. Simulations were  
1076 carried out using Model 2 (Section 0) with the parameters in Table 2 and Supplementary Table 6.  
1077

1078

1079

1080

1081

1082

1083

1084

1085

1086

1087

1088

1089

1090

1091

1092

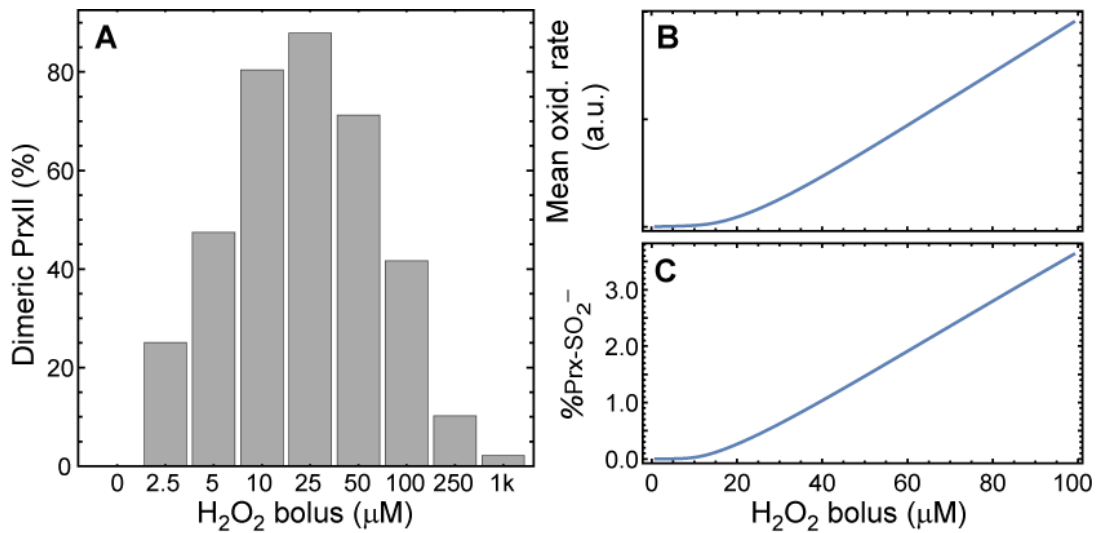

**Supplementary Figure 10. Simulation of experiments treating HEK293 cells with H<sub>2</sub>O<sub>2</sub> boluses considering a low Trx1 availability.** (A) Percentage of disulfide-crosslinked PrxII dimers 5 min after bolus treatment under the conditions of the experiments described in Figure 6B from Sobotta et al. [33]. The underestimation of crosslinked PrxII monomers at very high H<sub>2</sub>O<sub>2</sub> boluses is likely due to the neglect of GSH and NADPH depletion at the extremely high  $v_{sup}$  values attained under these non-physiological conditions. (B) Mean H<sub>2</sub>O<sub>2</sub> probe oxidation rate between  $t=30$  s and  $t=120$  s and (C) percentage of hyperoxidized Prx monomers 10 min after bolus treatment under the conditions of the experiments described in Figures 6D and 6F (respectively) from Tomalin et al. [56]. Simulations were carried out using Model 2 (Section 0) with the parameters in Table 2 and Supplementary Table 6, except for  $[Trx1]=1.5$  μM.

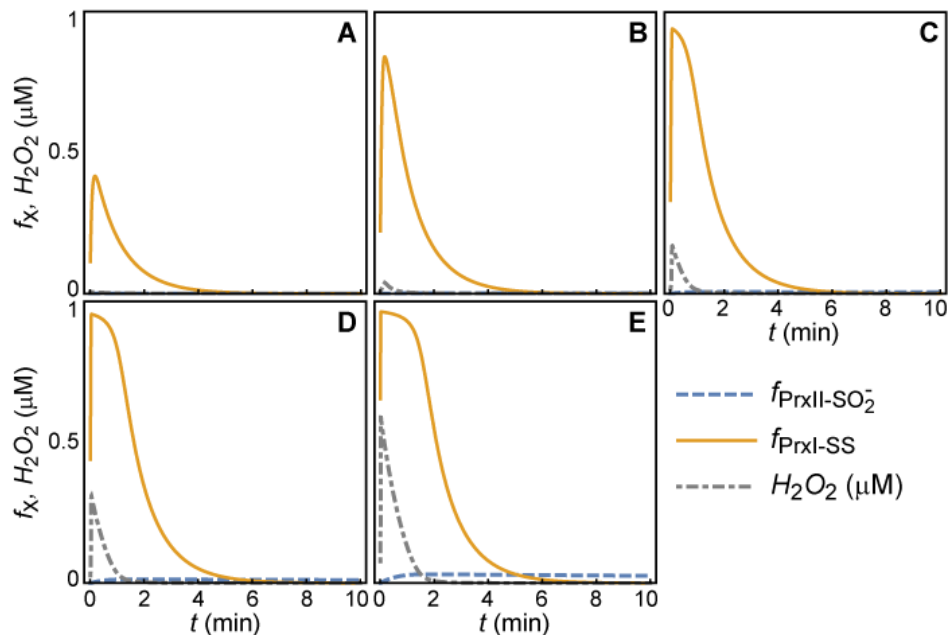

**Supplementary Figure 11. Simulated time courses for treatment of HEK293 cells with H<sub>2</sub>O<sub>2</sub> boluses.** Treatments under the conditions of the experiments described in Figures 6D and 6F from Tomalin et al. [56]. For comparison to Supplementary Figure 10B please note that the mean rate of probe oxidation is proportional to the area under the H<sub>2</sub>O<sub>2</sub> curve from  $t=30$  s to  $t=120$  s. (A) 5 μM H<sub>2</sub>O<sub>2</sub> bolus, (B) 10 μM, (C) 15 μM, (D) 20 μM, (E) 30 μM. Simulations were carried out using Model 2, with the same parameters as for Supplementary Figure 10. Similar results are obtained using Model 1, with the total fractions of disulfide and sulfinate peroxiredoxins as variables.

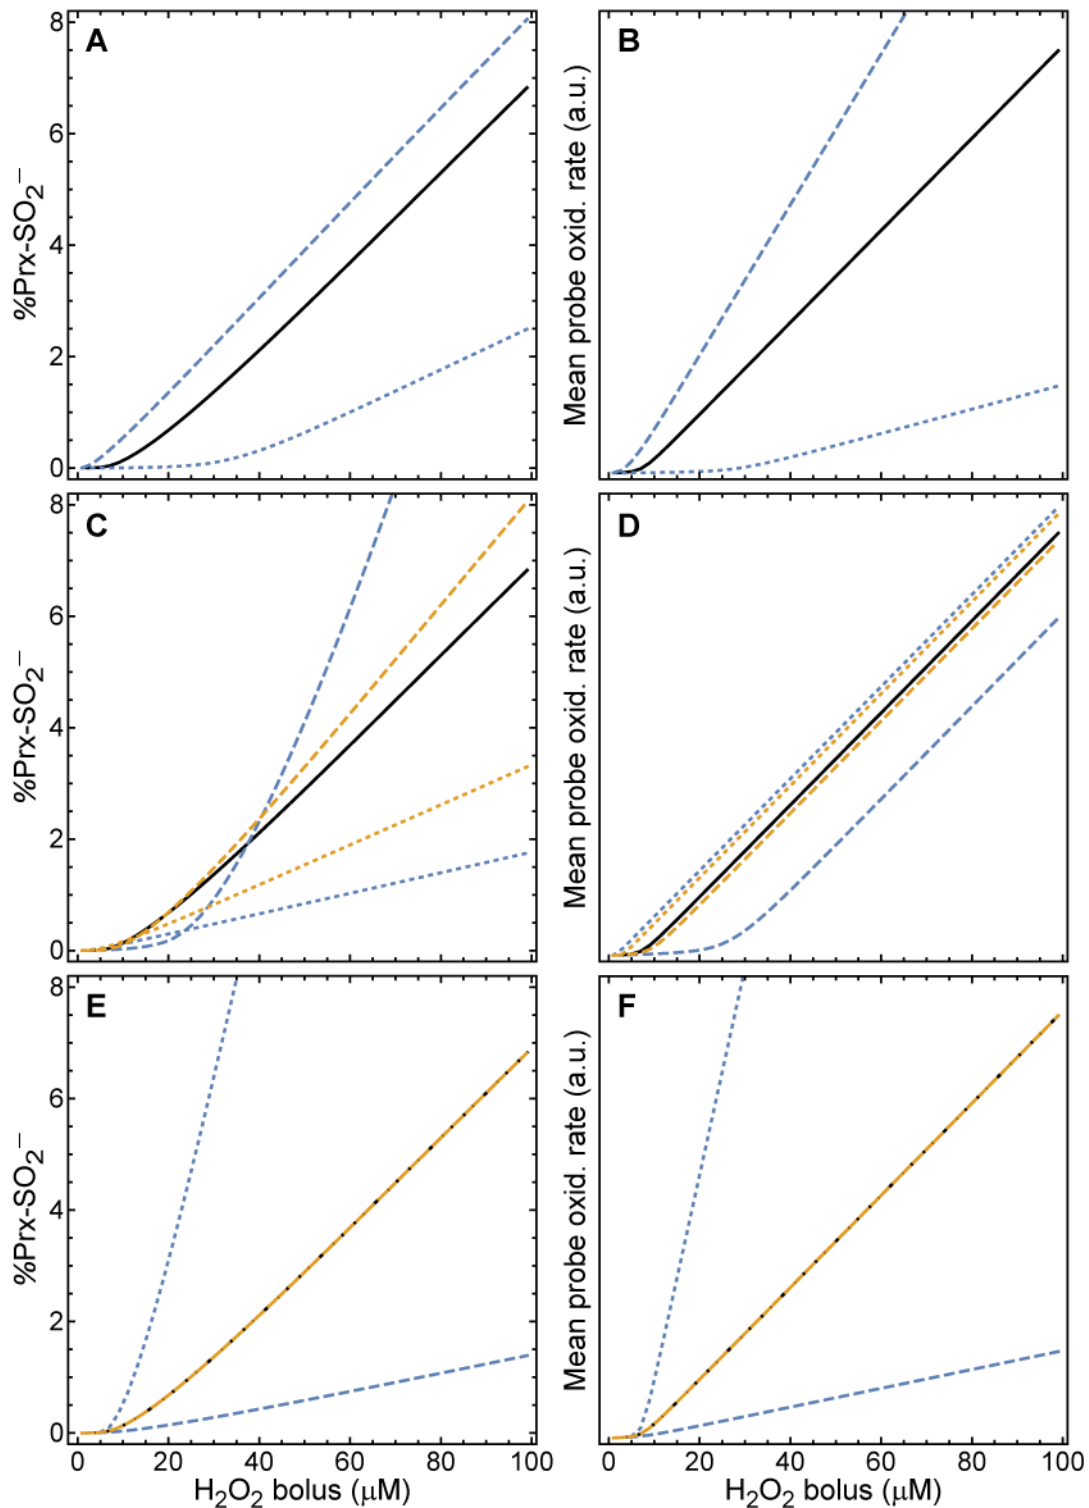

1094  
 1095  
 1096  
 1097  
 1098  
 1099  
 1100  
 1101  
 1102  
 1103

**Supplementary Figure 12. Influence of various factors on the threshold for Prx hyperoxidation and cytoplasmic H<sub>2</sub>O<sub>2</sub> accumulation.** Percentage of hyperoxidized Prx monomers 10 min after bolus treatment (A,C,E) and mean H<sub>2</sub>O<sub>2</sub> probe oxidation rate between t=30 s and t=120 s (B,D,F) under the conditions of the experiments described in Figures 6F and 6D (respectively) from Tomalin et al. [56]. Except as otherwise indicated, simulations were carried out using Model 1 and the parameters in Table 2 and Supplementary Table 6 for HEK293 cells (except [Trx1]= 1.5 μM) as reference. Solid black lines, results obtained for the reference parameter values; dotted and dashed lines, effect of 5-fold decrease or increase (respectively) of the following parameters: (A,B) permeability constant; (C,D) Trx<sub>T</sub>, blue;  $v_{Max}^{App}$ , yellow; (E,F) k<sub>Alt</sub>, blue; Prx<sub>T</sub>, yellow, overlapping the black line.

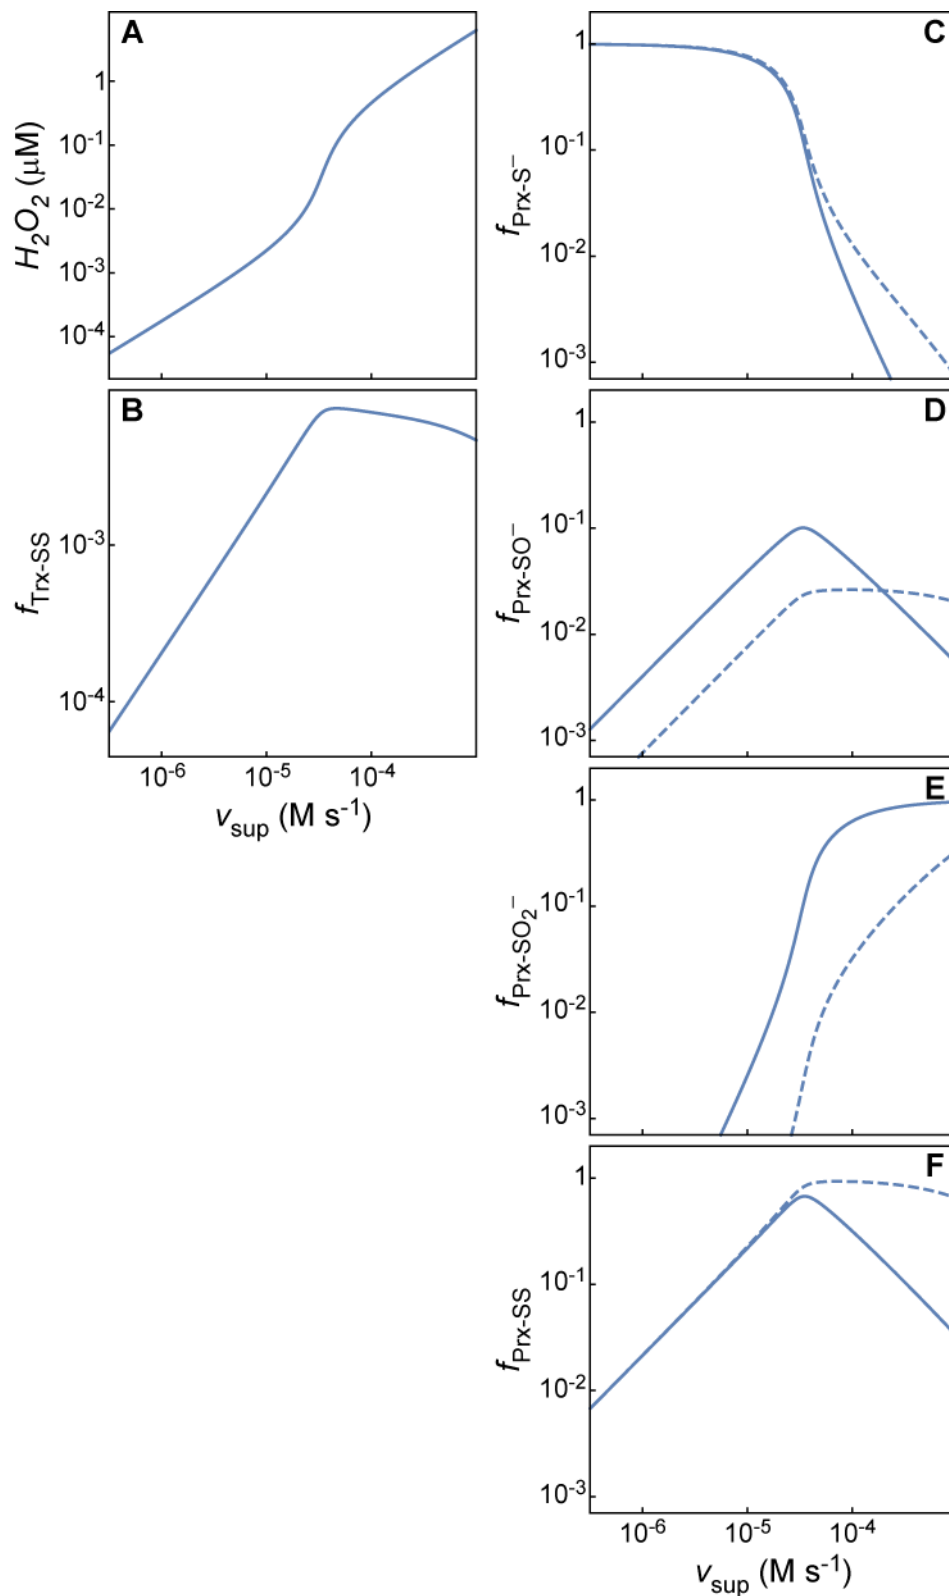

1105  
 1106 **Supplementary Figure 13. Simulated steady state response of the PTTRS in HEK293 cells to  $H_2O_2$  supply.**  
 1107 In panels C-F solid and dashed lines refer to PrxII and PrxI, respectively. Simulations were carried out using  
 1108 a variant of Model 2 (Section 0) replacing  $H_2O_2$  permeation by a prescribed  $H_2O_2$  supply rate ( $v_{sup}$ ).  
 1109 Parameter values are as shown in Table 2 and Supplementary Table 6 for HEK293 cells, except for  
 1110  $[Trx1] = 1.5 \mu M$ . Note the quite abrupt decrease in the fraction of both PrxI and PrxII in thiolate form over  
 1111 a narrow range of  $v_{sup}$ .



1112  
1113  
1114

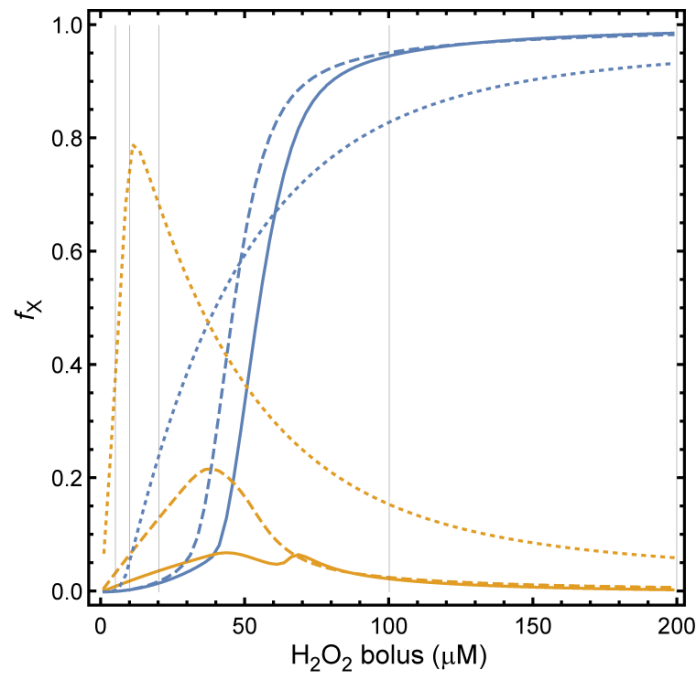

1115  
1116  
1117  
1118  
1119  
1120  
1121  
1122  
1123

**Supplementary Figure 14. Simulation of experiments treating Jurkat T cells with H<sub>2</sub>O<sub>2</sub> boluses.** Fraction of Prx as Prx-SO<sub>2</sub><sup>-</sup> (blue) and Prx-SS (yellow) for 10<sup>6</sup> Jurkat T cells/mL 10 min after treatment with the indicated boluses, for 100% (solid lines), 30% (dashed) and 3% of the Trx concentration indicated in Supplementary Table 6 for this cell line. The vertical gray lines indicate the boluses examined in Figures 2E and 3A of ref. [95]. Comparisons must take into account that the experiments over-estimate the fraction of disulfide-crosslinked Prx dimers due to adventitious oxidation during sample handling.[95] Note that the simulations considering the Trx concentration estimated from the proteomic dataset yield a good fit to the experimental observations but those considering 30% or 3% of this concentration do not.

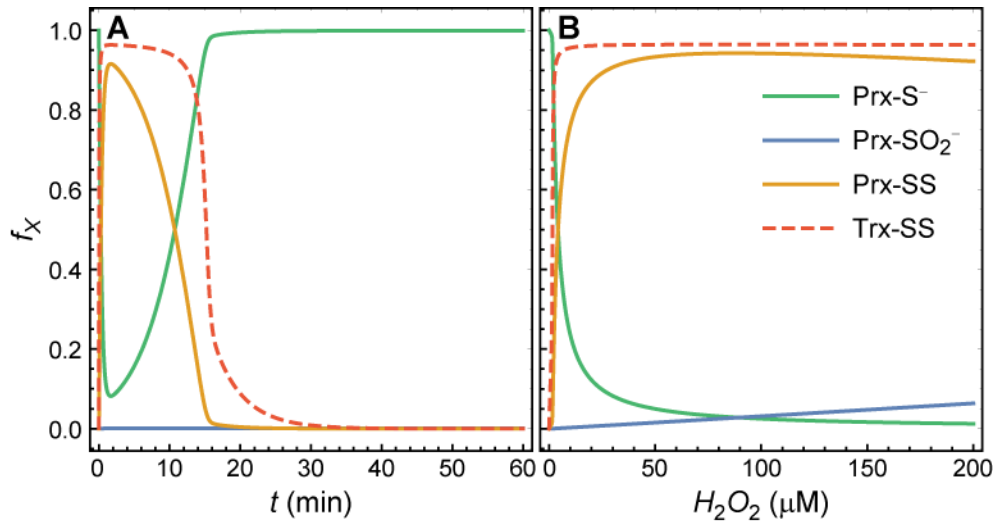

**Supplementary Figure 15. Simulation of experiments treating human erythrocytes with  $H_2O_2$  boluses.** Fraction of Prx as Prx-S<sup>-</sup>, Prx-SO<sub>2</sub><sup>-</sup> and Prx-SS, and of Trx as Trx-SS for  $5 \times 10^6$  erythrocytes/mL treated with  $5 \mu M$   $H_2O_2$  (A, compare to Figure 4A of ref. [95]) or 10 min after treatment with the indicated boluses (B, compare to Figure 3B of ref. [95]). Comparisons must take into account that the experiments overestimate the fraction of disulfide-crosslinked Prx dimers due to adventitious oxidation during sample handling.[95] Although computational predictions with Model 1 are less accurate than those with the much more complex model in ref. [31], they still provide a good match to the experimental observations.

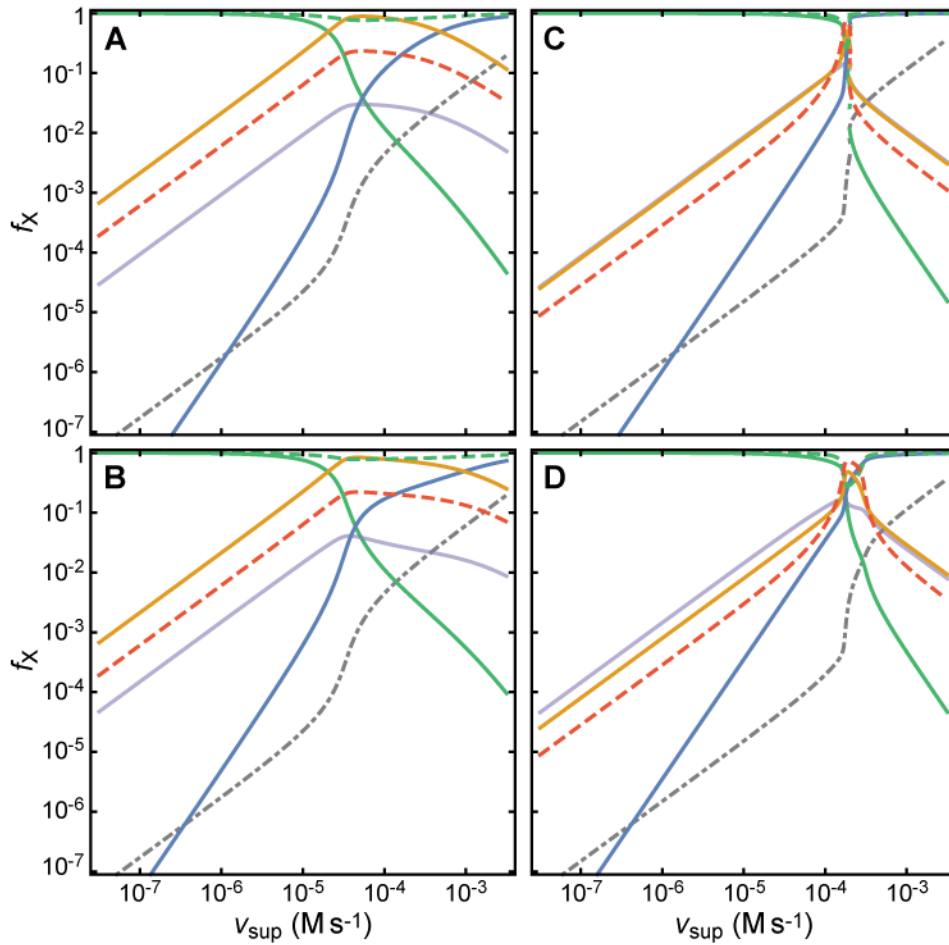

1125

1126 **Supplementary Figure 16. Comparison of simulation results from Model 1 (A,C) and Model 2 (B,D) for**  
 1127 **HEK293 (A,B) and Jurkat T (C,D) cells.** Simulations were carried out using the parameters in Table 2 and  
 1128 **Supplementary Table 6, except for  $[Trx1] = 1.5 \mu M$  in the case of HEK293.** Both models predict essentially  
 1129 **similar behavior.** Color codes are as for Figure 2 except that cytoplasmic  $H_2O_2$  concentrations are scaled  
 1130 **by  $100 \mu M$ .**

1131

1132 6. Additional design space slices and responses

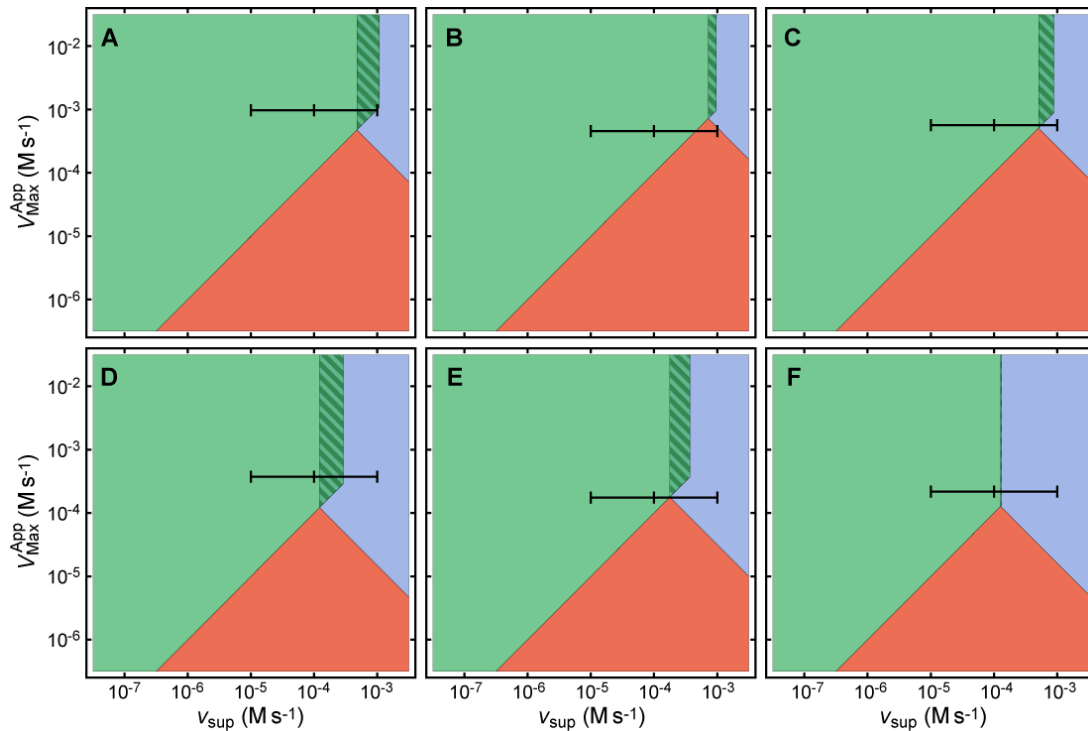

**Supplementary Figure 17.** Slices of the design space of the PTTRS over the physiological ( $v_{sup}$ ,  $V_{Max}^{App}$ ) planes for GaMG (A,D) , RKO (B,E), and U-2 OS (C,F) cells. In lack of reliable morphometric data for these cells, we consider the extreme values of  $f_{cytoplasm}$  and  $f_{nucleus}$  among the other cells in **Supplementary Table 4**. Namely,  $f_{cytoplasm}=0.3$ ,  $f_{nucleus}=0.6$  (A-C), and  $f_{cytoplasm}=0.78$ ,  $f_{nucleus}=0.18$  (D-F).

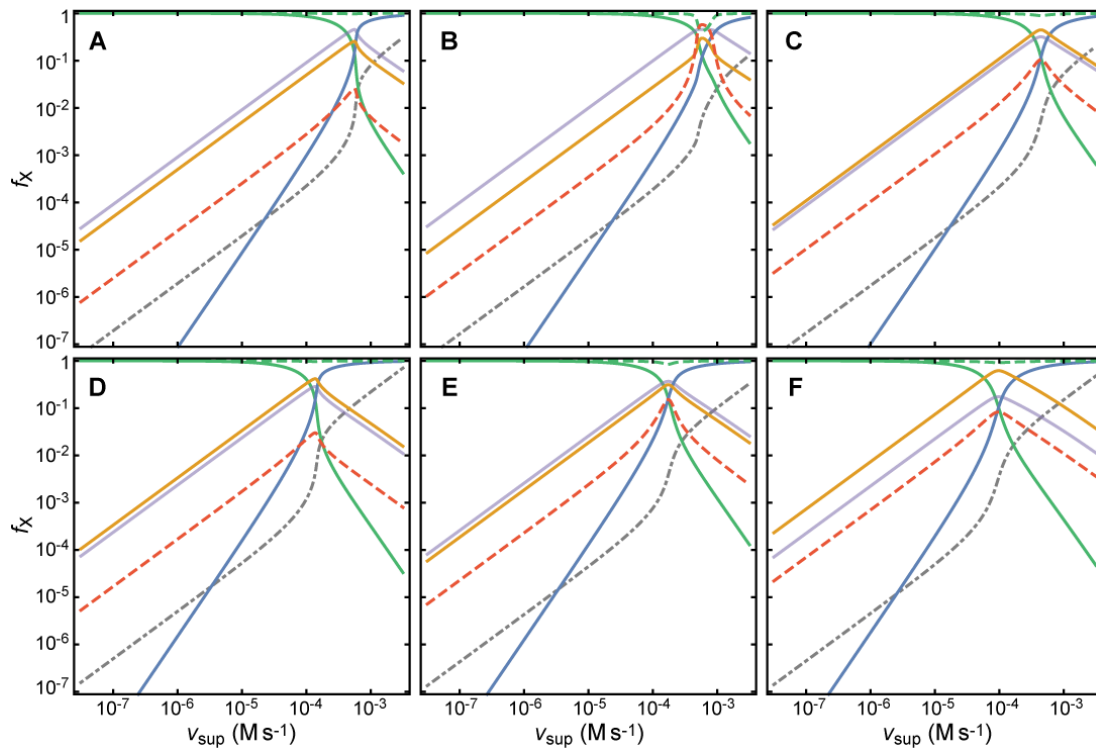

**Supplementary Figure 18.** Responses of the PTTRS to  $H_2O_2$  supply rates in GaMG (A,D), RKO (B,E), and U-2 OS (C,F) cells. Morphometric parameters are as for Supplementary Figure 17. Note the logarithmic scales. Predictions at  $v_{sup} > \approx 0.5 \text{ mM s}^{-1}$  may be inaccurate due to neglect of NADPH depletion. Color codes are as for Figure 2 from the main text. Cytoplasmic  $H_2O_2$  concentrations are scaled by  $100 \mu\text{M}$ .

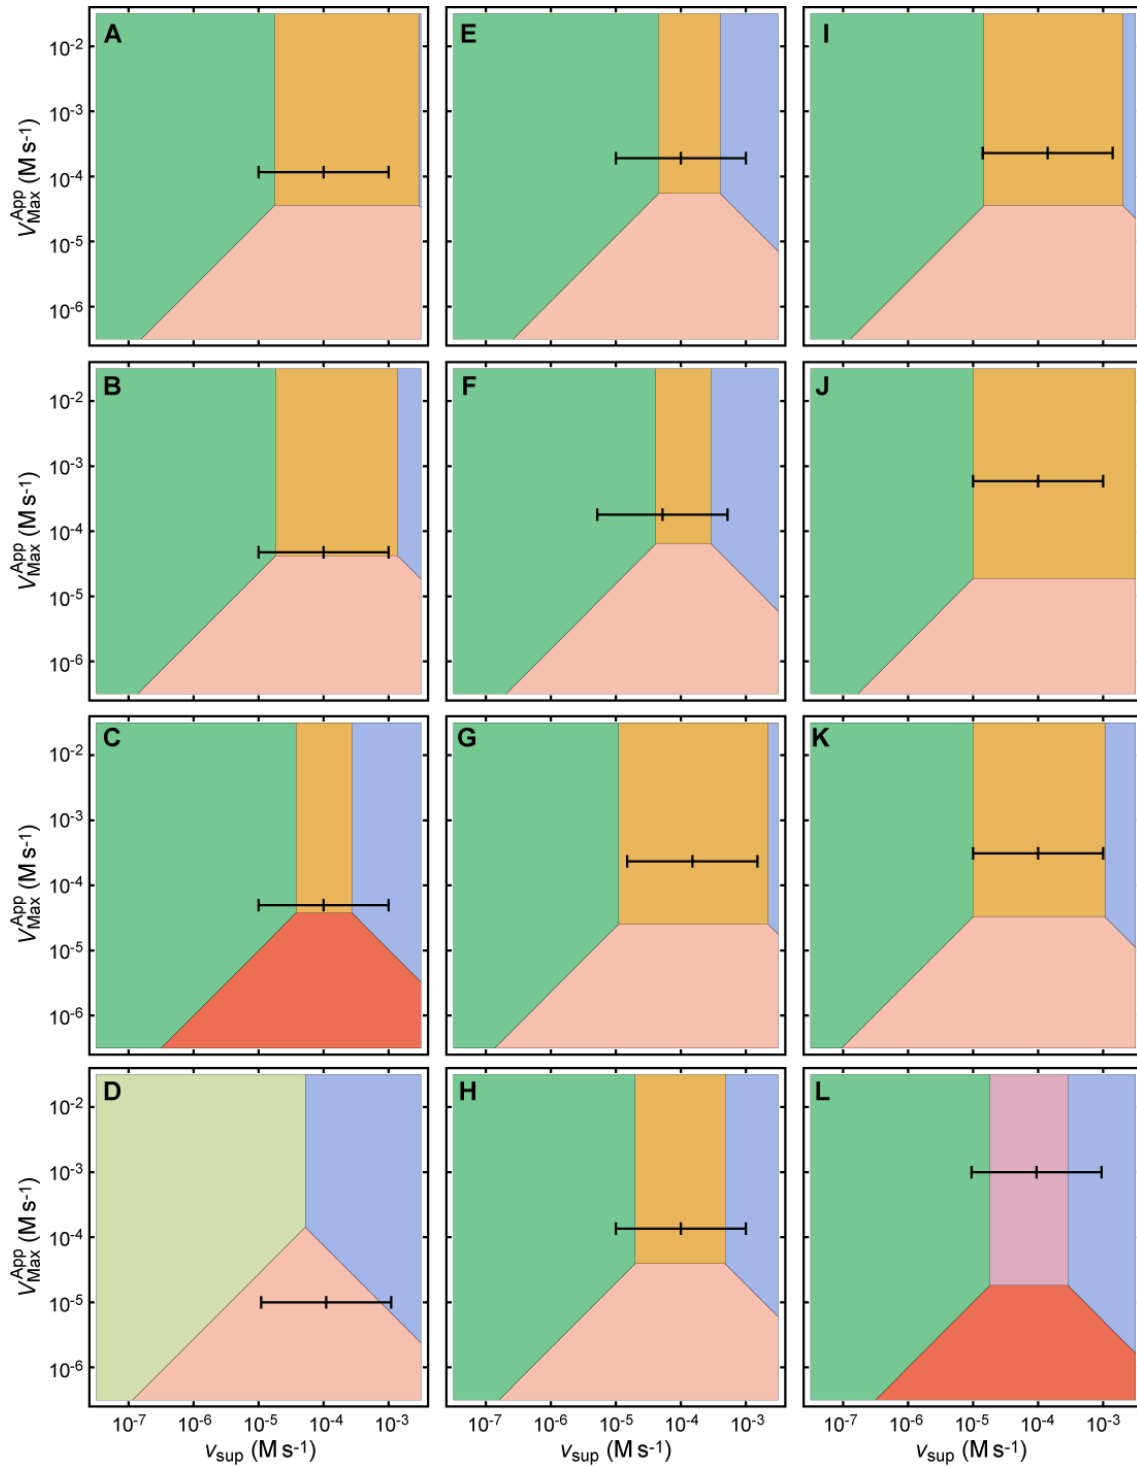

1133

1134 **Supplementary Figure 19. Slices of the design space of the PTRS over the physiological ( $v_{sup}, V_{Max}^{APP}$ )**  
 1135 **plane considering that only 3% of the Trx1 in nucleated human cells is available to reduce Prx-SS. The**  
 1136 **black scales inside the plots mark the apparent  $V_{Max}$  of TrxR and the values of  $v_{sup}$  corresponding to 1  $\mu$ M,**  
 1137 **10  $\mu$ M and 100  $\mu$ M extracellular  $H_2O_2$ . These values of  $v_{sup}$  were estimated based on the known cell**  
 1138 **permeability and morphology (HeLa, MCF-7, Jurkat T cells, erythrocytes and *S. cerevisiae*) or assuming**  
 1139  **$k_{inf} = 10 s^{-1}$  (all other cells). Note the logarithmic scales. Color codes are as for Figure 2. A, HepG2, ref. [52];**  
 1140 **B, HepG2, ref. [21]; C, hepatocytes; D, erythrocytes; E, HEK293; F, Jurkat T; G, HeLa; H, K562; I, MCF-7;**  
 1141 **J, A549; K, LnCap; L, *S. cerevisiae*.**

1142

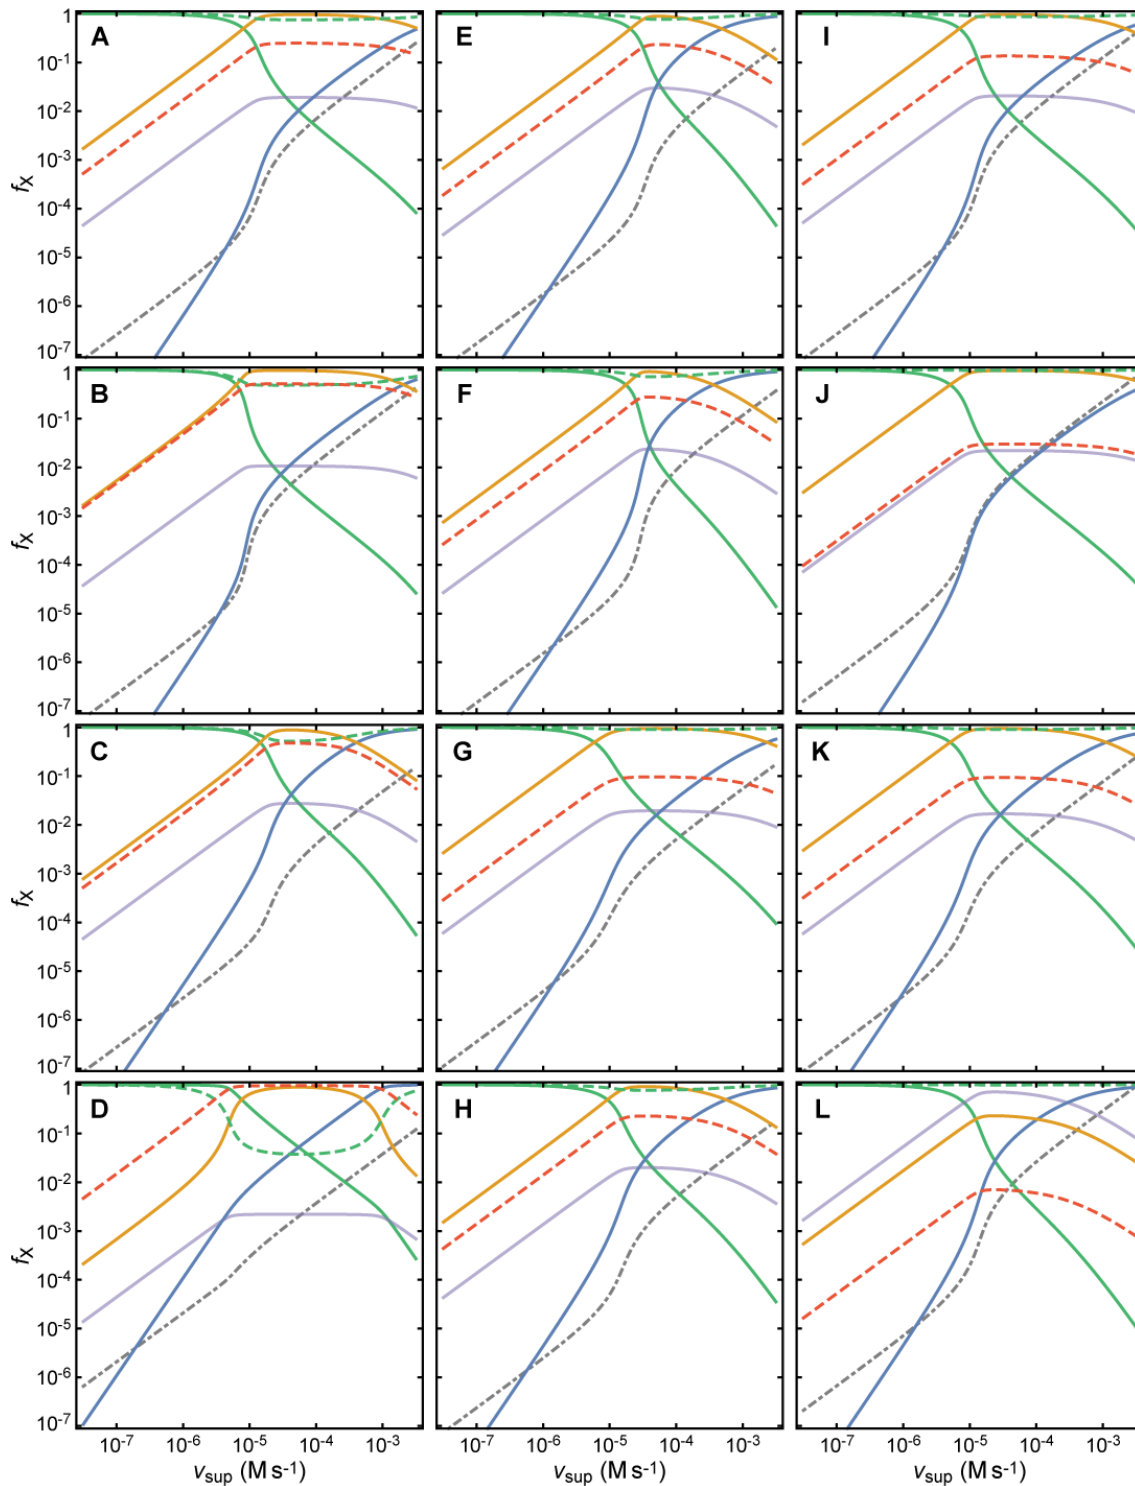

1144

1145 **Supplementary Figure 20. Responses of the PTTRS to  $H_2O_2$  supply rates for human cell types and *S.***  
 1146 ***cerevisiae* considering that only 3% of the Trx1 in nucleated human cells is available to reduce Prx-SS.**  
 1147 **Note the logarithmic scales. The plots were obtained by numerical integration of equations (1) in the main**  
 1148 **text with the parameters in Table 2, except for the concentration of Trx1 in nucleated human cells being**  
 1149 **3% of the values presented in that table. Predictions of the responses at  $v_{sup} > \approx 0.5 \text{ mM s}^{-1}$  may be**  
 1150 **inaccurate due to neglect of NADPH depletion. Color codes are as for Figure 2, except that cytoplasmic**  
 1151  **$H_2O_2$  concentrations are scaled by  $100 \mu\text{M}$ . A, HepG2, ref. [52]; B, HepG2, ref. [21]; C, hepatocytes; D,**  
 1152 **erythrocytes; E, HEK293; F, Jurkat T; G, HeLa; H, K562; I, MCF-7; J, A549; K, LnCap; L, *S. cerevisiae*.**

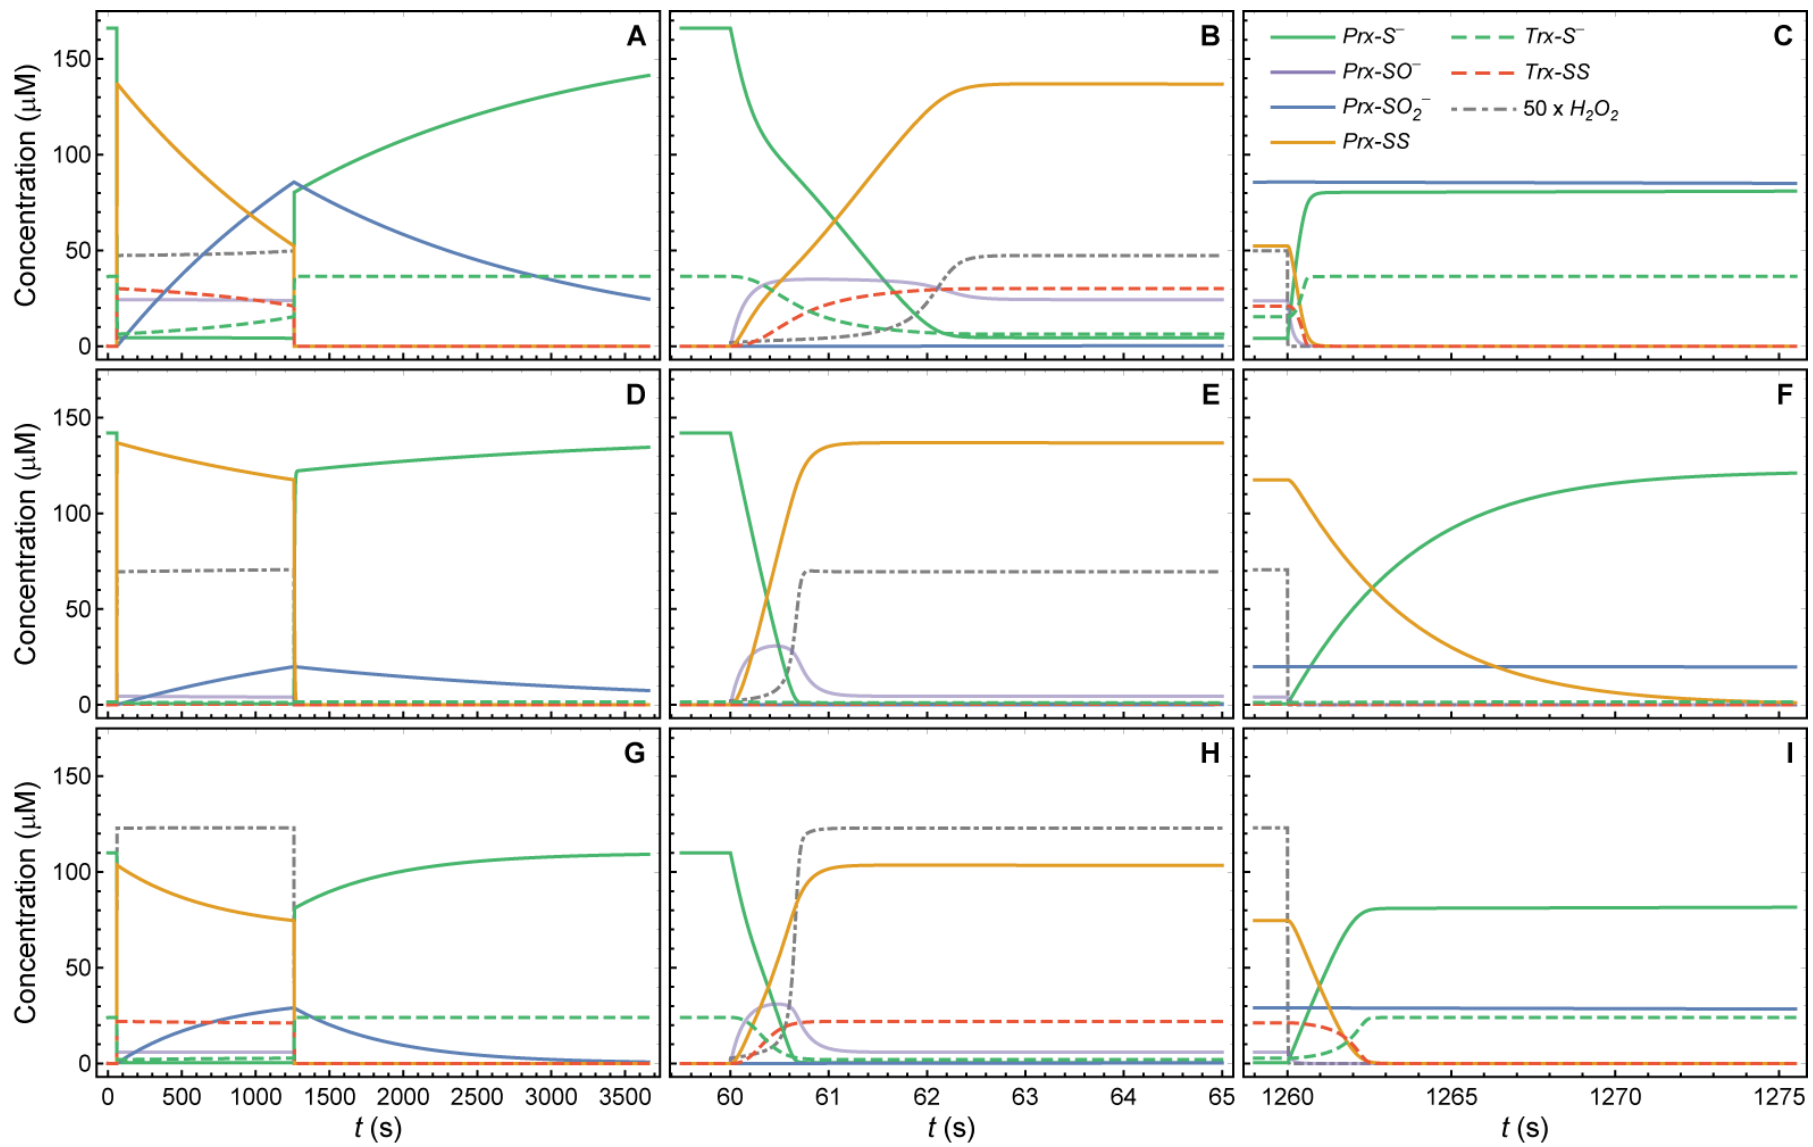

1153

1154 **Supplementary Figure 21. Transient response of the PTRS to temporary increases in  $H_2O_2$  supply beyond the limits of region TTPU.** (A,B,C) Jurkat T cells, Response H; (D,E,F)  
1155 HEK293 cells with  $Trx_T$  set to  $1.5 \mu M$ , Response PD; (G,H,I) HepG2 cells, Response D.  $v_{sup}$  was increased from  $10 \text{ nM s}^{-1}$  to  $250 \mu M \text{ s}^{-1}$  between  $t= 60 \text{ s}$  and  $t= 1260 \text{ s}$ , amounting  
1156 to a  $H_2O_2$  dose near the limit of what cells can survive. The time scale is expanded around  $t= 60 \text{ s}$  (B,E,H) and  $t= 1260 \text{ s}$  (C,F,I) to show the fast dynamics following the onset  
1157 and termination of the high- $v_{sup}$  period.  $H_2O_2$  concentrations are multiplied by 50, to fit in the same scale.

1158



## 1159 7. References

- 1160 [1] P.M.B.M. Coelho, A. Salvador, M.A. Savageau, Quantifying global tolerance of  
1161 biochemical systems: design implications for moiety-transfer cycles., *PLoS*  
1162 *Computational Biology*. 5 (2009) e1000319. doi:10.1371/journal.pcbi.1000319.
- 1163 [2] M.A. Savageau, P.M.B.M. Coelho, R.A. Fasani, D.A. Tolla, A. Salvador, Phenotypes and  
1164 tolerances in the design space of biochemical systems., *Proceedings of the National*  
1165 *Academy of Sciences of the United States of America*. 106 (2009) 6435–40.  
1166 doi:10.1073/pnas.0809869106.
- 1167 [3] R.A. Fasani, M.A. Savageau, Automated construction and analysis of the design space for  
1168 biochemical systems, *Bioinformatics*. 26 (2010) 2601–2609.  
1169 doi:10.1093/bioinformatics/btq479.
- 1170 [4] J.G. Lomnitz, M.A. Savageau, Phenotypic deconstruction of gene circuitry, *Chaos*. 23  
1171 (2013) 25108. doi:10.1063/1.4809776.
- 1172 [5] J.G. Lomnitz, M.A. Savageau, Strategy revealing phenotypic differences among synthetic  
1173 oscillator designs., *ACS Synthetic Biology*. 3 (2014) 686–701. doi:10.1021/sb500236e.
- 1174 [6] J.G. Lomnitz, M.A. Savageau, Elucidating the genotype–phenotype map by automatic  
1175 enumeration and analysis of the phenotypic repertoire, *Npj Systems Biology and*  
1176 *Applications*. 1 (2015) 15003. doi:10.1038/npjbsba.2015.3.
- 1177 [7] M.A. Savageau, Design principles for elementary gene circuits: Elements, methods, and  
1178 examples, *Chaos*. 11 (2001) 142–159. doi:10.1063/1.1349892.
- 1179 [8] M.A. Savageau, Biochemical systems analysis. I. Some mathematical properties of the  
1180 rate law for the component enzymatic reactions, *Journal Of Theoretical Biology*. 25  
1181 (1969) 365–369.
- 1182 [9] M.A. Savageau, Biochemical systems analysis. II. The steady-state solutions for an n-pool  
1183 system using a power-law approximation, *Journal Of Theoretical Biology*. 25 (1969) 370–  
1184 379.
- 1185 [10] M.A. Savageau, Biochemical systems analysis. III. Dynamic solutions using a power-law  
1186 approximation, *Journal Of Theoretical Biology*. 26 (1970) 215–226.
- 1187 [11] S. Schuster, T. Hofer, Determining all extreme semi-positive conservation relations in

- 1188 chemical-reaction systems - A test criterion for conservativity, *Journal Of The Chemical*  
1189 *Society-Faraday Transactions*. 87 (1991) 2561–2566.
- 1190 [12] T. Geiger, A. Wehner, C. Schaab, J. Cox, M. Mann, Comparative proteomic analysis of  
1191 eleven common cell lines reveals ubiquitous but varying expression of most proteins,  
1192 *Molecular & Cellular Proteomics: MCP*. 11 (2012) M111.014050.  
1193 doi:10.1074/mcp.M111.014050.
- 1194 [13] W. Liebermeister, E. Noor, A. Flamholz, D. Davidi, J. Bernhardt, R. Milo, Visual account of  
1195 protein investment in cellular functions, *Proceedings of the National Academy of*  
1196 *Sciences*. 111 (2014) 8488–8493. doi:10.1073/pnas.1314810111.
- 1197 [14] R. Milo, What is the total number of protein molecules per cell volume? A call to rethink  
1198 some published values, *BioEssays*. 35 (2013) 1050–1055. doi:10.1002/bies.201300066.
- 1199 [15] Z. Wang, W. Shen, D.P. Kotler, S. Heshka, L. Wielopolski, J.F. Aloia, M.E. Nelson, R.N.  
1200 Pierson, S.B. Heymsfield, Total body protein: a new cellular level mass and distribution  
1201 prediction model., *The American Journal of Clinical Nutrition*. 78 (2003) 979–84.
- 1202 [16] R.J. Ellis, Macromolecular crowding: an important but neglected aspect of the  
1203 intracellular environment, *Current Opinion in Structural Biology*. 11 (2001) 114–119.  
1204 doi:10.1016/S0959-440X(00)00172-X.
- 1205 [17] C. Fumarola, S. La Monica, R.R. Alfieri, E. Borra, G.G. Guidotti, Cell size reduction induced  
1206 by inhibition of the mTOR/S6K-signaling pathway protects Jurkat cells from apoptosis.,  
1207 *Cell Death and Differentiation*. 12 (2005) 1344–57. doi:10.1038/sj.cdd.4401660.
- 1208 [18] Y. Feng, N. Zhang, K.M. Jacobs, W. Jiang, L. V. Yang, Z. Li, J. Zhang, J.Q. Lu, X.-H. Hu,  
1209 Polarization imaging and classification of Jurkat T and Ramos B cells using a flow  
1210 cytometer, *Cytometry Part A*. 85 (2014) 986–986. doi:10.1002/cyto.a.22524.
- 1211 [19] L. Brocchieri, S. Karlin, Protein length in eukaryotic and prokaryotic proteomes., *Nucleic*  
1212 *Acids Research*. 33 (2005) 3390–400. doi:10.1093/nar/gki615.
- 1213 [20] R. Milo, R. Phillips, *Cell Biology by the Numbers*, 1st ed., Taylor & Francis, New York, 2016.
- 1214 [21] J.R. Wiśniewski, A. Vildhede, A. Norén, P. Artursson, In-depth quantitative analysis and  
1215 comparison of the human hepatocyte and hepatoma cell line HepG2 proteomes, *Journal*  
1216 *of Proteomics*. 136 (2016) 234–247. doi:10.1016/j.jprot.2016.01.016.
- 1217 [22] The UniProt Consortium, UniProt: a hub for protein information, *Nucleic Acids Research*.  
1218 43 (2015) D204–D212. doi:10.1093/nar/gku989.

- 1219 [23] R. Jiang, H. Shen, Y.-J. Piao, The morphometrical analysis on the ultrastructure of A549  
1220 cells., *Romanian Journal of Morphology and Embryology*. 51 (2010) 663–7.
- 1221 [24] H. Kempe, A. Schwabe, F. Crémazy, P.J. Verschure, F.J. Bruggeman, The volumes and  
1222 transcript counts of single cells reveal concentration homeostasis and capture biological  
1223 noise., *Molecular Biology of the Cell*. 26 (2015) 797–804. doi:10.1091/mbc.E14-08-1296.
- 1224 [25] A. Fujioka, K. Terai, R.E. Itoh, K. Aoki, T. Nakamura, S. Kuroda, E. Nishida, M. Matsuda,  
1225 Dynamics of the Ras/ERK MAPK Cascade as Monitored by Fluorescent Probes, *Journal of*  
1226 *Biological Chemistry*. 281 (2006) 8917–8926. doi:10.1074/jbc.M509344200.
- 1227 [26] R. Huang, L. Zhao, H. Chen, R.-H. Yin, C.-Y. Li, Y.-Q. Zhan, J.-H. Zhang, C. Ge, M. Yu, X.-M.  
1228 Yang, Megakaryocytic Differentiation of K562 Cells Induced by PMA Reduced the Activity  
1229 of Respiratory Chain Complex IV, *PLoS ONE*. 9 (2014) e96246.  
1230 doi:10.1371/journal.pone.0096246.
- 1231 [27] D.C. Lazar, E.H. Cho, M.S. Luttgen, T.J. Metzner, M.L. Uson, M. Torrey, M.E. Gross, P.  
1232 Kuhn, Cytometric comparisons between circulating tumor cells from prostate cancer  
1233 patients and the prostate-tumor-derived LNCaP cell line., *Physical Biology*. 9 (2012)  
1234 16002. doi:10.1088/1478-3975/9/1/016002.
- 1235 [28] M.J. Moore, E.M. Strohm, M.C. Kolios, Assessment of the Nucleus-to-Cytoplasmic Ratio  
1236 in MCF-7 Cells Using Ultra-high Frequency Ultrasound and Photoacoustics, *International*  
1237 *Journal of Thermophysics*. 37 (2016) 118. doi:10.1007/s10765-016-2129-y.
- 1238 [29] P.J. Thul, L. Åkesson, M. Wiking, D. Mahdessian, A. Geladaki, H. Ait Blal, T. Alm, A.  
1239 Asplund, L. Björk, L.M. Breckels, A. Bäckström, F. Danielsson, L. Fagerberg, J. Fall, L. Gatto,  
1240 C. Gnann, S. Hober, M. Hjelmare, F. Johansson, S. Lee, C. Lindskog, J. Mulder, C.M.  
1241 Mulvey, P. Nilsson, P. Oksvold, J. Rockberg, R. Schutten, J.M. Schwenk, Å. Sivertsson, E.  
1242 Sjöstedt, M. Skogs, C. Stadler, D.P. Sullivan, H. Tegel, C. Winsnes, C. Zhang, M. Zwahlen,  
1243 A. Mardinoglu, F. Pontén, K. von Feilitzen, K.S. Lilley, M. Uhlén, E. Lundberg, A subcellular  
1244 map of the human proteome, *Science*. 356 (2017).
- 1245 [30] F. Antunes, E. Cadenas, Estimation of H<sub>2</sub>O<sub>2</sub> gradients across biomembranes, *Febs*  
1246 *Letters*. 475 (2000) 121–126. doi:doi:10.1016/S0003-9861(02)00049-8.
- 1247 [31] R. Benfeitas, G. Selvaggio, F. Antunes, P.M.B.M. Coelho, A. Salvador, Hydrogen peroxide  
1248 metabolism and sensing in human erythrocytes: A validated kinetic model and  
1249 reappraisal of the role of peroxiredoxin II, *Free Radical Biology and Medicine*. 74 (2014)  
1250 35–49. doi:10.1016/j.freeradbiomed.2014.06.007.

- 1251 [32] B.K. Huang, H.D. Sikes, Quantifying intracellular hydrogen peroxide perturbations in  
 1252 terms of concentration, *Redox Biology*. 2 (2014) 955–962.  
 1253 doi:10.1016/j.redox.2014.08.001.
- 1254 [33] M.C. Sobotta, A.G. Barata, U. Schmidt, S. Mueller, G. Millonig, T.P. Dick, Exposing cells to  
 1255 H<sub>2</sub>O<sub>2</sub>: A quantitative comparison between continuous low-dose and one-time high-dose  
 1256 treatments, *Free Radical Biology and Medicine*. 60 (2013) 325–335.  
 1257 doi:10.1016/j.freeradbiomed.2013.02.017.
- 1258 [34] B.A. Wagner, J.R. Witmer, T.J. van 't Erve, G.R. Buettner, An Assay for the Rate of Removal  
 1259 of Extracellular Hydrogen Peroxide by Cells., *Redox Biology*. 1 (2013) 210–217.  
 1260 doi:10.1016/j.redox.2013.01.011.
- 1261 [35] C.M. Doskey, V. Buranasudja, B.A. Wagner, J.G. Wilkes, J. Du, J.J. Cullen, G.R. Buettner,  
 1262 Tumor cells have decreased ability to metabolize H<sub>2</sub>O<sub>2</sub>: Implications for pharmacological  
 1263 ascorbate in cancer therapy, *Redox Biology*. 10 (2016) 274–284.  
 1264 doi:10.1016/j.redox.2016.10.010.
- 1265 [36] V. Oliveira-Marques, T. Silva, F. Cunha, G. Covas, H.S. Marinho, F. Antunes, L. Cyrne, A  
 1266 quantitative study of the cell-type specific modulation of c-Rel by hydrogen peroxide and  
 1267 TNF- $\alpha$ , *Redox Biology*. 1 (2013) 347–352. doi:10.1016/j.redox.2013.05.004.
- 1268 [37] V. de Oliveira-Marques, L. Cyrne, H.S. Marinho, F. Antunes, A quantitative study of NF-  
 1269 kappa B activation by H<sub>2</sub>O<sub>2</sub>: Relevance in inflammation and synergy with TNF- $\alpha$ ,  
 1270 *Journal of Immunology*. 178 (2007) 3893–3902.
- 1271 [38] L. Flohé, G. Loschen, W.A. Gunzler, E. Eichele, Glutathione peroxidase, V. The kinetic  
 1272 mechanism, *Hoppe-Seylers Zeitschrift Fur Physiologische Chemie*. 353 (1972) 987–999.
- 1273 [39] G. Takebe, J. Yarimizu, Y. Saito, T. Hayashi, H. Nakamura, J. Yodoi, S. Nagasawa, K.  
 1274 Takahashi, A comparative study on the hydroperoxide and thiol specificity of the  
 1275 glutathione peroxidase family and selenoprotein P, *Journal Of Biological Chemistry*. 277  
 1276 (2002) 41254–41258. doi:10.1074/jbc.M202773200.
- 1277 [40] A.B. Fisher, C. Dodia, Y. Manevich, J.-W. Chen, S.I. Feinstein, Phospholipid  
 1278 Hydroperoxides Are Substrates for Non-selenium Glutathione Peroxidase, *Journal Of  
 1279 Biological Chemistry*. 274 (1999) 21326–21334.
- 1280 [41] Y. Manevich, S.I. Feinstein, A.B. Fisher, Activation of the antioxidant enzyme 1-CYS  
 1281 peroxiredoxin requires glutathionylation mediated by heterodimerization with GST,

- 1282 Proceedings of the National Academy of Sciences. 101 (2004) 3780–3785.  
1283 doi:10.1073/pnas.0400181101.
- 1284 [42] S. Zhou, E.M. Sorokina, S. Harper, H. Li, L. Ralat, C. Dodia, D.W. Speicher, S.I. Feinstein,  
1285 A.B. Fisher, Peroxiredoxin 6 homodimerization and heterodimerization with glutathione  
1286 S-transferase pi are required for its peroxidase but not phospholipase A2 activity, Free  
1287 Radical Biology and Medicine. 94 (2016) 145–156.  
1288 doi:10.1016/j.freeradbiomed.2016.02.012.
- 1289 [43] R.E. Hansen, D. Roth, J.R. Winther, Quantifying the global cellular thiol-disulfide status,  
1290 Proceedings of the National Academy of Sciences. 106 (2009) 422–427.  
1291 doi:10.1073/pnas.0812149106.
- 1292 [44] N.S. Kosower, E.M. Kosower, B. Wertheim, W.S. Correa, Diamide, a new reagent for the  
1293 intracellular oxidation of glutathione to the disulfide, Biochemical and Biophysical  
1294 Research Communications. 37 (1969) 593–596. doi:10.1016/0006-291X(69)90850-X.
- 1295 [45] C.C. Winterbourn, D. Metodiewa, Reactivity of biologically important thiol compounds  
1296 with superoxide and hydrogen peroxide, 27 (1999).
- 1297 [46] J.R. Stone, An assessment of proposed mechanisms for sensing hydrogen peroxide in  
1298 mammalian systems, Archives Of Biochemistry And Biophysics. 422 (2004) 119–124.
- 1299 [47] H.S. Marinho, C. Real, L. Cyrne, H. Soares, F. Antunes, Hydrogen peroxide sensing,  
1300 signaling and regulation of transcription factors., Redox Biology. 2 (2014) 535–562.  
1301 doi:10.1016/j.redox.2014.02.006.
- 1302 [48] E. Weerapana, C. Wang, G.M. Simon, F. Richter, S. Khare, M.B.D. Dillon, D.A. Bachovchin,  
1303 K. Mowen, D. Baker, B.F. Cravatt, Quantitative reactivity profiling predicts functional  
1304 cysteines in proteomes, Nature. 468 (2010) 790–795.
- 1305 [49] J.W. Baty, M.B. Hampton, C.C. Winterbourn, Proteomic detection of hydrogen peroxide-  
1306 sensitive thiol proteins in Jurkat cells, Biochem. J. 389 (2005) 785–795.  
1307 doi:10.1042/bj20050337.
- 1308 [50] N. Le Moan, G. Clement, S. Le Maout, F. Tacnet, M.B. Toledano, The *Saccharomyces*  
1309 *cerevisiae* proteome of oxidized protein thiols - Contrasted functions for the thioredoxin  
1310 and glutathione pathways, Journal Of Biological Chemistry. 281 (2006) 10420–10430.
- 1311 [51] K. Araki, H. Kusano, N. Sasaki, R. Tanaka, T. Hatta, K. Fukui, T. Natsume, Redox  
1312 Sensitivities of Global Cellular Cysteine Residues under Reductive and Oxidative Stress,

- 1313 Journal of Proteome Research. 15 (2016) 2548–2559.  
 1314 doi:10.1021/acs.jproteome.6b00087.
- 1315 [52] T. Geiger, A. Wehner, C. Schaab, J. Cox, M. Mann, Comparative Proteomic Analysis of  
 1316 Eleven Common Cell Lines Reveals Ubiquitous but Varying Expression of Most Proteins,  
 1317 Molecular & Cellular Proteomics. 11 (2012) M111.014050-M111.014050.  
 1318 doi:10.1074/mcp.M111.014050.
- 1319 [53] C. Little, P.J. O’Brien, Mechanism of Peroxide-Inactivation of the Sulphydryl Enzyme  
 1320 Glyceraldehyde-3-Phosphate Dehydrogenase, European Journal of Biochemistry. 10  
 1321 (1969) 533–538. doi:10.1111/j.1432-1033.1969.tb00721.x.
- 1322 [54] C.C. Winterbourn, M.B. Hampton, Thiol chemistry and specificity in redox signaling, Free  
 1323 Radical Biology and Medicine. 45 (2008) 549–561.  
 1324 doi:10.1016/j.freeradbiomed.2008.05.004.
- 1325 [55] N.J. Adimora, D.P. Jones, M.L. Kemp, A Model of Redox Kinetics Implicates the Thiol  
 1326 Proteome in Cellular Hydrogen Peroxide Responses, Antioxidants & Redox Signaling. 13  
 1327 (2010) 731–743. doi:10.1089/ars.2009.2968.
- 1328 [56] L.E. Tomalin, A.M. Day, Z.E. Underwood, G.R. Smith, P. Dalle Pezze, C. Rallis, W. Patel,  
 1329 B.C. Dickinson, J. Bähler, T.F. Brewer, C.J.-L. Chang, D.P. Shanley, E.A. Veal, Increasing  
 1330 extracellular H<sub>2</sub>O<sub>2</sub> produces a bi-phasic response in intracellular H<sub>2</sub>O<sub>2</sub>, with  
 1331 peroxiredoxin hyperoxidation only triggered once the cellular H<sub>2</sub>O<sub>2</sub>-buffering capacity is  
 1332 overwhelmed, Free Radical Biology and Medicine. 95 (2016) 333–348.  
 1333 doi:10.1016/j.freeradbiomed.2016.02.035.
- 1334 [57] B. Morgan, D. Ezeriņa, T.N.E. Amoako, J. Riemer, M. Seedorf, T.P. Dick, Multiple  
 1335 glutathione disulfide removal pathways mediate cytosolic redox homeostasis., Nature  
 1336 Chemical Biology. 9 (2013) 119–25. doi:10.1038/nchembio.1142.
- 1337 [58] S. Mueller, H.D. Riedel, W. Stremmel, Determination of catalase activity at physiological  
 1338 hydrogen peroxide concentrations, Analytical Biochemistry. 245 (1997) 55–60.
- 1339 [59] J. Switala, P.C. Loewen, Diversity of properties among catalases, Archives of Biochemistry  
 1340 and Biophysics. 401 (2002) 145–154. doi:10.1016/S0003-9861(02)00049-8.
- 1341 [60] S.G. Rhee, S.W. Kang, T.S. Chang, W. Jeong, K. Kim, Peroxiredoxin, a novel family of  
 1342 peroxidases, IUBMB Life. 52 (2001) 35–41. doi:10.1080/15216540252774748.
- 1343 [61] B. Manta, M. Hugo, C. Ortiz, G. Ferrer-Sueta, M. Trujillo, A. Denicola, The peroxidase and

- 1344 peroxynitrite reductase activity of human erythrocyte peroxiredoxin 2., Archives of  
1345 Biochemistry and Biophysics. 484 (2009) 146–54. doi:10.1016/j.abb.2008.11.017.
- 1346 [62] A.V. Peskin, F.M. Low, L.N. Paton, G.J. Maghzal, M.B. Hampton, C.C. Winterbourn, The  
1347 High Reactivity of Peroxiredoxin 2 with H<sub>2</sub>O<sub>2</sub> Is Not Reflected in Its Reaction with  
1348 Other Oxidants and Thiol Reagents, The Journal of Biological Chemistry. 282 (2007)  
1349 11885–11892. doi:10.1074/jbc.M700339200.
- 1350 [63] A. V Peskin, N. Dickerhof, R.A. Poynton, L.N. Paton, P.E. Pace, M.B. Hampton, C.C.  
1351 Winterbourn, Hyperoxidation of peroxiredoxins 2 and 3: Rate constants for the reactions  
1352 of the sulfenic acid of the peroxidatic cysteine, J. Biol. Chem. 288 (2013) 14170–14177.  
1353 doi:10.1074/jbc.M113.460881.
- 1354 [64] R.A. Poynton, A. V Peskin, A.C. Haynes, W.T. Lowther, M.B. Hampton, C.C. Winterbourn,  
1355 Kinetic analysis of structural influences on the susceptibility of peroxiredoxins 2 and 3 to  
1356 hyperoxidation, Biochemical Journal. 473 (2016) 411–421. doi:10.1042/BJ20150572.
- 1357 [65] L.A.C. Carvalho, D.R. Truzzi, T.S. Fallani, S. V Alves, J.C. Toledo Junior, O. Augusto, L.E.S.  
1358 Netto, F.C. Meotti, Urate hydroperoxide oxidizes human peroxiredoxin 1 and  
1359 peroxiredoxin 2., The Journal of Biological Chemistry. (2017) jbc.M116.767657.  
1360 doi:10.1074/jbc.M116.767657.
- 1361 [66] A. V Peskin, N. Dickerhof, R.A. Poynton, L.N. Paton, P.E. Pace, M.B. Hampton, C.C.  
1362 Winterbourn, Hyperoxidation of peroxiredoxins 2 and 3: Rate constants for the reactions  
1363 of the sulfenic acid of the peroxidatic cysteine, The Journal of Biological Chemistry. 288  
1364 (2013) 14170–14177. doi:10.1074/jbc.M113.460881.
- 1365 [67] L.A.C. Carvalho, D.R. Truzzi, T.S. Fallani, S. V Alves, J.C. Toledo Junior, O. Augusto, L.E.S.  
1366 Netto, F.C. Meotti, Urate hydroperoxide oxidizes human peroxiredoxin 1 and  
1367 peroxiredoxin 2., The Journal of Biological Chemistry. 292 (2017) 8705–8715.  
1368 doi:10.1074/jbc.M116.767657.
- 1369 [68] H.A. Woo, S.H. Yim, D.H. Shin, D. Kang, D.-Y. Yu, S.G. Rhee, Inactivation of peroxiredoxin  
1370 I by phosphorylation allows localized H<sub>2</sub>O<sub>2</sub> accumulation for cell signaling, Cell. 140  
1371 (2010) 517–528.
- 1372 [69] J.H. Seo, J.C. Lim, D.Y. Lee, K.S. Kim, G. Piszczek, H.W. Nam, Y.S. Kim, T. Ahn, C.H. Yun, K.  
1373 Kim, P.B. Chock, H.Z. Chae, Novel Protective Mechanism against Irreversible  
1374 Hyperoxidation of Peroxiredoxin N-alpha-terminal acetylation of human peroxiredoxin,  
1375 Journal Of Biological Chemistry. 284 (2009) 13455–13465. doi:10.1074/jbc.M900641200.

- 1376 [70] K.-S. Yang, S.W. Kang, H.A. Woo, S.C. Hwang, H.Z. Chae, K. Kim, S.G. Rhee, Inactivation of  
1377 human peroxiredoxin I during catalysis as the result of the oxidation of the catalytic site  
1378 cysteine to cysteine-sulfinic acid, *J Biol Chem.* 277 (2002) 38029–38036.
- 1379 [71] J.W. Park, J.J. Mieyal, S.G. Rhee, P.B. Chock, Deglutathionylation of 2-Cys Peroxiredoxin  
1380 Is Specifically Catalyzed by Sulfiredoxin, *The Journal of Biological Chemistry.* 284 (2009)  
1381 23364–23374. doi:10.1074/jbc.M109.021394.
- 1382 [72] A. V. Peskin, P.E. Pace, J.B. Behring, L.N. Paton, M. Soethoudt, M.M. Bachschmid, C.C.  
1383 Winterbourn, Glutathionylation of the Active Site Cysteines of Peroxiredoxin 2 and  
1384 Recycling by Glutaredoxin, *The Journal of Biological Chemistry.* 291 (2016) 3053–3062.  
1385 doi:10.1074/jbc.M115.692798.
- 1386 [73] H.Z. Chae, H.J. Kim, S.W. Kang, S.G. Rhee, Characterization of three isoforms of  
1387 mammalian peroxiredoxin that reduce peroxides in the presence of thioredoxin,  
1388 *Diabetes Research and Clinical Practice.* 45 (1999) 101–112. doi:10.1016/S0168-  
1389 8227(99)00037-6.
- 1390 [74] B.K. Huang, T.F. Langford, H.D. Sikes, Using Sensors and Generators of H<sub>2</sub>O<sub>2</sub> to Elucidate  
1391 the Toxicity Mechanism of Piperlongumine and Phenethyl Isothiocyanate, *Antioxidants  
1392 & Redox Signaling.* 24 (2016) 924–938. doi:10.1089/ars.2015.6482.
- 1393 [75] W.T. Lowther, A.C. Haynes, Reduction of cysteine sulfinic acid in eukaryotic, typical 2-Cys  
1394 peroxiredoxins by sulfiredoxin., *Antioxidants & Redox Signaling.* 15 (2011) 99–109.  
1395 doi:10.1089/ars.2010.3564.
- 1396 [76] X. Roussel, A. Kriznik, C. Richard, S. Rahuel-Clermont, G. Branlant, Catalytic Mechanism  
1397 of Sulfiredoxin from *Saccharomyces cerevisiae* Passes through an Oxidized Disulfide  
1398 Sulfiredoxin Intermediate That Is Reduced by Thioredoxin, *Journal Of Biological  
1399 Chemistry.* 284 (2009) 33048–33055. doi:10.1074/jbc.M109.035352.
- 1400 [77] X. Roussel, S. Boukhenouna, S. Rahuel-Clermont, G. Branlant, The rate-limiting step of  
1401 sulfiredoxin is associated with the transfer of the  $\gamma$ -phosphate of ATP to the sulfinic acid  
1402 of overoxidized typical 2-Cys peroxiredoxins, *FEBS Letters.* 585 (2011) 574–578.  
1403 doi:10.1016/j.febslet.2011.01.012.
- 1404 [78] X. Roussel, G. Béchade, A. Kriznik, A. Van Dorsselaer, S. Sanglier-Cianferani, G. Branlant,  
1405 S. Rahuel-Clermont, Evidence for the Formation of a Covalent Thiosulfinate Intermediate  
1406 with Peroxiredoxin in the Catalytic Mechanism of Sulfiredoxin, *Journal of Biological  
1407 Chemistry.* 283 (2008) 22371–22382. doi:10.1074/jbc.M800493200.



- 1408 [79] J.C. Moon, G.M. Kim, E.K. Kim, H.N. Lee, B. Ha, S.Y. Lee, H.H. Jang, Reversal of 2-Cys  
1409 peroxiredoxin oligomerization by sulfiredoxin, *Biochemical and Biophysical Research*  
1410 *Communications*. 432 (2013) 291–295. doi:10.1016/j.bbrc.2013.01.114.
- 1411 [80] W. Jeong, S.J. Park, T.-S. Chang, D.-Y. Lee, S.G. Rhee, Molecular Mechanism of the  
1412 Reduction of Cysteine Sulfinic Acid of Peroxiredoxin to Cysteine by Mammalian  
1413 Sulfiredoxin, *Journal of Biological Chemistry*. 281 (2006) 14400–14407.  
1414 doi:10.1074/jbc.M511082200.
- 1415 [81] S. Boukhenouna, H. Mazon, G. Branlant, C. Jacob, M.B. Toledano, S. Rahuel-Clermont,  
1416 Evidence That Glutathione and the Glutathione System Efficiently Recycle 1-Cys  
1417 Sulfiredoxin *In Vivo*, *Antioxidants & Redox Signaling*. 22 (2015) 731–743.  
1418 doi:10.1089/ars.2014.5998.
- 1419 [82] T.-S. Chang, W. Jeong, H.A. Woo, S.M. Lee, S. Park, S.G. Rhee, Characterization of  
1420 mammalian sulfiredoxin and its reactivation of hyperoxidized peroxiredoxin through  
1421 reduction of cysteine sulfinic acid in the active site to cysteine, *J. Biol. Chem.* 279 (2004)  
1422 50994–51001.
- 1423 [83] H.A. Woo, S.W. Kang, H.K. Kim, K.-S. Yang, H.Z. Chae, S.G. Rhee, Reversible oxidation of  
1424 the active site cysteine of peroxiredoxins to cysteine sulfinic acid. Immunoblot detection  
1425 with antibodies specific for the hyperoxidized cysteine-containing sequence, *J Biol Chem*.  
1426 278 (2003) 47361–47364.
- 1427 [84] M. Chevallet, E. Wagner, S. Luche, A. van Dorsselaer, E. Leize-Wagner, T. Rabilloud,  
1428 Regeneration of peroxiredoxins during recovery after oxidative stress - Only some  
1429 overoxidized peroxiredoxins can be reduced during recovery after oxidative stress,  
1430 *Journal Of Biological Chemistry*. 278 (2003) 37146–37153. doi:10.1074/jbc.M305161200.
- 1431 [85] S.J. Wei, A. Botero, K. Hirota, C.M. Bradbury, S. Markovina, A. Laszlo, D.R. Spitz, P.C.  
1432 Goswami, J. Yodoi, D. Gius, Thioredoxin nuclear translocation and interaction with redox  
1433 factor-1 activates the activator protein-1 transcription factor in response to ionizing  
1434 radiation., *Cancer Research*. 60 (2000) 6688–95.
- 1435 [86] S.J. Montano, J. Lu, T.N. Gustafsson, A. Holmgren, Activity assays of mammalian  
1436 thioredoxin and thioredoxin reductase: Fluorescent disulfide substrates, mechanisms,  
1437 and use with tissue samples, *Analytical Biochemistry*. 449 (2014) 139–146.  
1438 doi:10.1016/J.AB.2013.12.025.
- 1439 [87] S. Lee, S.M. Kim, R.T. Lee, Thioredoxin and Thioredoxin Target Proteins: From Molecular

- 1440 Mechanisms to Functional Significance, *Antioxidants and Redox Signaling*. 18 (2012)  
1441 1165–1207. doi:10.1089/ars.2011.4322.
- 1442 [88] X. Wang, S. Ling, D. Zhao, Q. Sun, Q. Li, F. Wu, J. Nie, L. Qu, B. Wang, X. Shen, Y. Bai, Y. Li,  
1443 Y. Li, Redox Regulation of Actin by Thioredoxin-1 Is Mediated by the Interaction of the  
1444 Proteins via Cysteine 62, *Antioxidants & Redox Signaling*. 13 (2010) 565–573.  
1445 doi:10.1089/ars.2009.2833.
- 1446 [89] A. Nishiyama, M. Matsui, S. Iwata, K. Hirota, H. Masutani, H. Nakamura, Y. Takagi, H.  
1447 Sono, Y. Gon, J. Yodoi, Identification of thioredoxin-binding protein-2/vitamin D(3) up-  
1448 regulated protein 1 as a negative regulator of thioredoxin function and expression., *The*  
1449 *Journal of Biological Chemistry*. 274 (1999) 21645–50. doi:10.1074/JBC.274.31.21645.
- 1450 [90] K. Hirota, M. Matsui, S. Iwata, A. Nishiyama, K. Mori, J. Yodoi, AP-1 transcriptional activity  
1451 is regulated by a direct association between thioredoxin and Ref-1., *Proceedings of the*  
1452 *National Academy of Sciences of the United States of America*. 94 (1997) 3633–8.
- 1453 [91] P. Schroeder, R. Popp, B. Wiegand, J. Altschmied, J. Haendeler, Nuclear redox-signaling is  
1454 essential for apoptosis inhibition in endothelial cells--important role for nuclear  
1455 thioredoxin-1., *Arteriosclerosis, Thrombosis, and Vascular Biology*. 27 (2007) 2325–31.  
1456 doi:10.1161/ATVBAHA.107.149419.
- 1457 [92] M. Kontou, C. Adelfalk, M. Hirsch-Kauffmann, M. Schweiger, Suboptimal Action of NF- $\kappa$ B  
1458 in Fanconi Anemia Cells Results from Low Levels of Thioredoxin, *Biological Chemistry*.  
1459 384 (2003). doi:10.1515/BC.2003.166.
- 1460 [93] I. Grattagliano, S. Russmann, V.O. Palmieri, P. Portincasa, G. Palasciano, B.H. Lauterburg,  
1461 Glutathione peroxidase, thioredoxin, and membrane protein changes in erythrocytes  
1462 predict ribavirin-induced anemia[ast], *Clin Pharmacol Ther*. 78 (2005) 422–432.
- 1463 [94] R. Eidukevicius, D. Characiejus, R. Janavicius, N. Kazlauskaite, V. Pasukoniene, M.  
1464 Mauricas, W. Den Otter, A method to estimate cell cycle time and growth fraction using  
1465 bromodeoxyuridine-flow cytometry data from a single sample., *BMC Cancer*. 5 (2005)  
1466 122. doi:10.1186/1471-2407-5-122.
- 1467 [95] F.M. Low, M.B. Hampton, A. V Peskin, C.C. Winterbourn, Peroxiredoxin 2 functions as a  
1468 noncatalytic scavenger of low-level hydrogen peroxide in the erythrocyte, *Blood*. 109  
1469 (2007) 2611–2617. doi:10.1182/blood-2006-09-048728.
- 1470 [96] L.W. Zhong, E.S.J. Arner, A. Holmgren, Structure and mechanism of mammalian

1471 thioredoxin reductase: The active site is a redox-active selenolthiol/selenenylsulfide  
1472 formed from the conserved cysteine-selenocysteine sequence, *Proceedings Of The*  
1473 *National Academy Of Sciences Of The United States Of America.* 97 (2000) 5854–5859.

1474 [97] S. Gromer, L.D. Arscott, C.H. Williams, R.H. Schirmer, K. Becker, Human placenta  
1475 thioredoxin reductase. Isolation of the selenoenzyme, steady state kinetics, and  
1476 inhibition by therapeutic gold compounds, 273 (1998) 20096–20101.  
1477 doi:10.1074/jbc.273.32.20096.

1478 [98] A.A. Turanov, D. Su, V.N. Gladyshev, Characterization of Alternative Cytosolic Forms and  
1479 Cellular Targets of Mouse Mitochondrial Thioredoxin Reductase, *Journal of Biological*  
1480 *Chemistry.* 281 (2006) 22953–22963. doi:10.1074/jbc.M604326200.

1481 [99] S. Urig, K. Becker, On the potential of thioredoxin reductase inhibitors for cancer  
1482 therapy., *Seminars in Cancer Biology.* 16 (2006) 452–65.  
1483 doi:10.1016/j.semcancer.2006.09.004.

1484 [100] R.A. Cairns, I.S. Harris, T.W. Mak, Regulation of cancer cell metabolism, *Nature Reviews*  
1485 *Cancer.* 11 (2011) 85–95. doi:10.1038/nrc2981.

1486 [101] J. Fan, J. Ye, J.J. Kamphorst, T. Shlomi, C.B. Thompson, J.D. Rabinowitz, Quantitative flux  
1487 analysis reveals folate-dependent NADPH production., *Nature.* 510 (2014) 298–302.  
1488 doi:10.1038/nature13236.

1489 [102] M. V Ursini, A. Parrella, G. Rosa, S. Salzano, G. Martini, Enhanced expression of glucose-  
1490 6-phosphate dehydrogenase in human cells sustaining oxidative stress., *Biochemical*  
1491 *Journal.* 323 (1997) 801–6.

1492 [103] H.N. Kirkman, W.G. Wilson, E.H. Clemons, Regulation of glucose-6-phosphate-  
1493 dehydrogenase .1. Intact red- cells, *Journal of Laboratory and Clinical Medicine.* 95 (1980)  
1494 877–887.

1495 [104] A. Salvador, M.A. Savageau, Quantitative evolutionary design of glucose 6-phosphate  
1496 dehydrogenase expression in human erythrocytes, *Proceedings of the National Academy*  
1497 *of Sciences.* 100 (2003) 14463–14468. doi:10.1073/pnas.2335687100.

1498 [105] K. Birsoy, R. Possemato, F.K. Lorbeer, E.C. Bayraktar, P. Thiru, B. Yucel, T. Wang, W.W.  
1499 Chen, C.B. Clish, D.M. Sabatini, Metabolic determinants of cancer cell sensitivity to  
1500 glucose limitation and biguanides., *Nature.* 508 (2014) 108–12.  
1501 doi:10.1038/nature13110.

- 1502 [106] A. Kuehne, H. Emmert, J. Soehle, M. Winnefeld, F. Fischer, H. Wenck, S. Gallinat, L.  
1503 Terstegen, R. Lucius, J. Hildebrand, N. Zamboni, Acute Activation of Oxidative Pentose  
1504 Phosphate Pathway as First-Line Response to Oxidative Stress in Human Skin Cells.,  
1505 *Molecular Cell*. 59 (2015) 359–371. doi:10.1016/j.molcel.2015.06.017.
- 1506 [107] A. Salvador, M.A. Savageau, Evolution of enzymes in a series is driven by dissimilar  
1507 functional demands, *Proceedings of the National Academy of Sciences*. 103 (2006) 2226–  
1508 2231. doi:10.1073/pnas.0510776103.
- 1509 [108] M.R. Branco, H.S. Marinho, L. Cyrne, F. Antunes, Decrease of H<sub>2</sub>O<sub>2</sub> plasma membrane  
1510 permeability during adaptation to H<sub>2</sub>O<sub>2</sub> in *Saccharomyces cerevisiae*., *The Journal of*  
1511 *Biological Chemistry*. 279 (2004) 6501–6506. doi:10.1074/jbc.M311818200.
- 1512 [109] C.D. Powell, D.E. Quain, K.A. Smart, Chitin scar breaks in aged *Saccharomyces cerevisiae*,  
1513 *Microbiology*. 149 (2003) 3129–3137. doi:10.1099/mic.0.25940-0.
- 1514 [110] M. Kamihira, M. Taniguchi, T. Kobayashi, Sterilization of Microorganisms with  
1515 Supercritical Carbon Dioxide, *Agricultural and Biological Chemistry*. 51 (1987) 407–412.  
1516 doi:10.1080/00021369.1987.10868053.
- 1517 [111] P. Jorgensen, J.L. Nishikawa, B.-J. Breitkreutz, M. Tyers, Systematic Identification of  
1518 Pathways That Couple Cell Growth and Division in Yeast, *Science*. 297 (2002) 395–400.  
1519 doi:10.1126/science.1070850.
- 1520 [112] M. Uchida, Y. Sun, G. McDermott, C. Knoechel, M.A. Le Gros, D. Parkinson, D.G. Drubin,  
1521 C.A. Larabell, Quantitative analysis of yeast internal architecture using soft X-ray  
1522 tomography., *Yeast (Chichester, England)*. 28 (2011) 227–36. doi:10.1002/yea.1834.
- 1523 [113] S. Ghaemmaghami, W.-K.K. Huh, K. Bower, R.W. Howson, A. Belle, N. Dephoure, E.K.  
1524 O’Shea, J.S. Weissman, Global analysis of protein expression in yeast, *Nature*. 425 (2003)  
1525 737–741. doi:10.1038/nature02046.
- 1526 [114] J.E. Erman, L.B. Vitello, Yeast cytochrome c peroxidase: mechanistic studies via protein  
1527 engineering., *Biochimica et Biophysica Acta*. 1597 (2002) 193–220.
- 1528 [115] N. Ertugay, H. Hamamci, Continuous cultivation of bakers’ yeast: Change in cell  
1529 composition at different dilution rates and effect of heat stress on trehalose level, *Folia*  
1530 *Microbiologica*. 42 (1997) 463–467. doi:10.1007/BF02826554.
- 1531 [116] J.S. Jeong, S.J. Kwon, S.W. Kang, S.G. Rhee, K. Kim, Purification and Characterization of a  
1532 Second Type Thioredoxin Peroxidase (Type II TPx) from *Saccharomyces cerevisiae*†,

1533 Biochemistry. 38 (1998) 776–783. doi:10.1021/BI9817818.

1534 [117] C.A. Tairum, M.C. Santos, C.A. Breyer, R.R. Geyer, C.J. Nieves, S. Portillo-Ledesma, G.  
1535 Ferrer-Sueta, J.C. Toledo, M.H. Toyama, O. Augusto, L.E.S. Netto, M.A. de Oliveira, M.A.  
1536 de Oliveira, Catalytic Thr or Ser Residue Modulates Structural Switches in 2-Cys  
1537 Peroxiredoxin by Distinct Mechanisms., Scientific Reports. 6 (2016) 33133.  
1538 doi:10.1038/srep33133.

1539 [118] R. Ogusucu, D. Rettori, D.C. Munhoz, L.E. Soares Netto, O. Augusto, Reactions of yeast  
1540 thioredoxin peroxidases I and II with hydrogen peroxide and peroxyxynitrite: Rate  
1541 constants by competitive kinetics, Free Radical Biology and Medicine. 42 (2007) 326–334.  
1542 doi:10.1016/j.freeradbiomed.2006.10.042.

1543 [119] C.A. Tairum Jr., M.A. de Oliveira, B.B. Horta, F.J. Zara, L.E.S. Netto, Disulfide Biochemistry  
1544 in 2-Cys Peroxiredoxin: Requirement of Glu50 and Arg146 for the Reduction of Yeast Tsa1  
1545 by Thioredoxin, Journal of Molecular Biology. 424 (2012) 28–41.  
1546 doi:10.1016/j.jmb.2012.09.008.

1547 [120] M.A. Oliveira, K.F. Discola, S. V. Alves, F.J. Medrano, B.G. Guimarães, L.E.S. Netto, Insights  
1548 into the Specificity of Thioredoxin Reductase–Thioredoxin Interactions. A Structural and  
1549 Functional Investigation of the Yeast Thioredoxin System, Biochemistry. 49 (2010) 3317–  
1550 3326. doi:10.1021/bi901962p.

1551 [121] D.C. Munhoz, L.E.S. Netto, Cytosolic Thioredoxin Peroxidase I and II Are Important  
1552 Defenses of Yeast against Organic Hydroperoxide Insult CATALASES AND  
1553 PEROXIREDOXINS COOPERATE IN THE DECOMPOSITION OF H<sub>2</sub>O<sub>2</sub> BY YEAST, Journal of  
1554 Biological Chemistry. 279 (2004) 35219–35227. doi:10.1074/jbc.M313773200.

1555 [122] F.-M. Lian, J. Yu, X.-X. Ma, X.-J. Yu, Y. Chen, C.-Z. Zhou, Structural snapshots of yeast alkyl  
1556 hydroperoxide reductase Ahp1 peroxiredoxin reveal a novel two-cysteine mechanism of  
1557 electron transfer to eliminate reactive oxygen species., The Journal of Biological  
1558 Chemistry. 287 (2012) 17077–87. doi:10.1074/jbc.M112.357368.

1559
